# Supplementary material for: Uranium perturbs signaling and iron uptake response in Arabidopsis thaliana roots
Source: Royal Society of Chemistry journal article supplement (doi:10.1039/c4mt00005f), 2014-01-01

**AT1G01580**

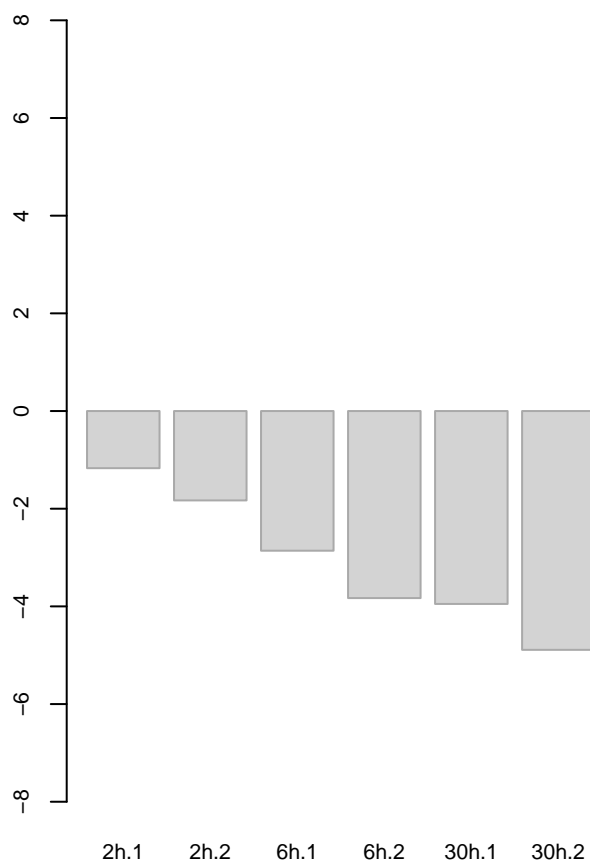

**AT1G03870**

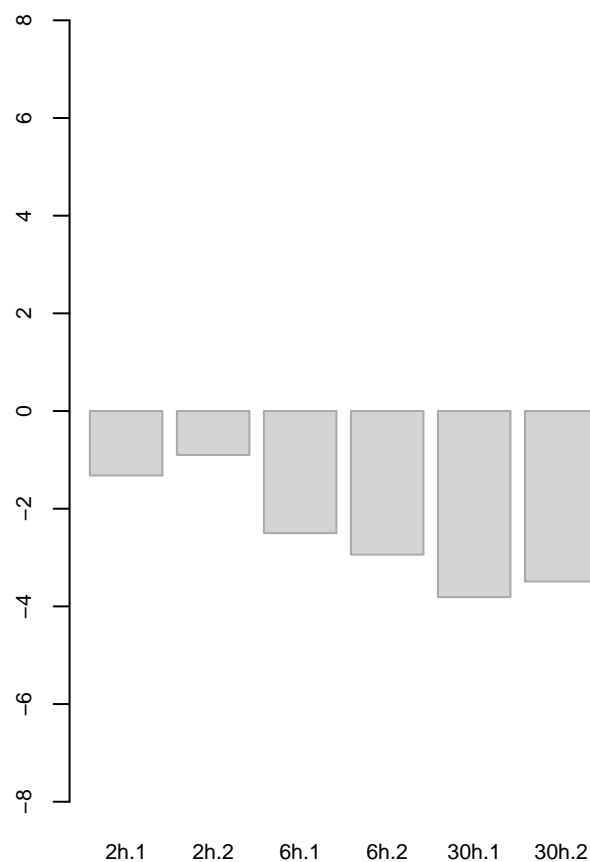

**AT1G05250**

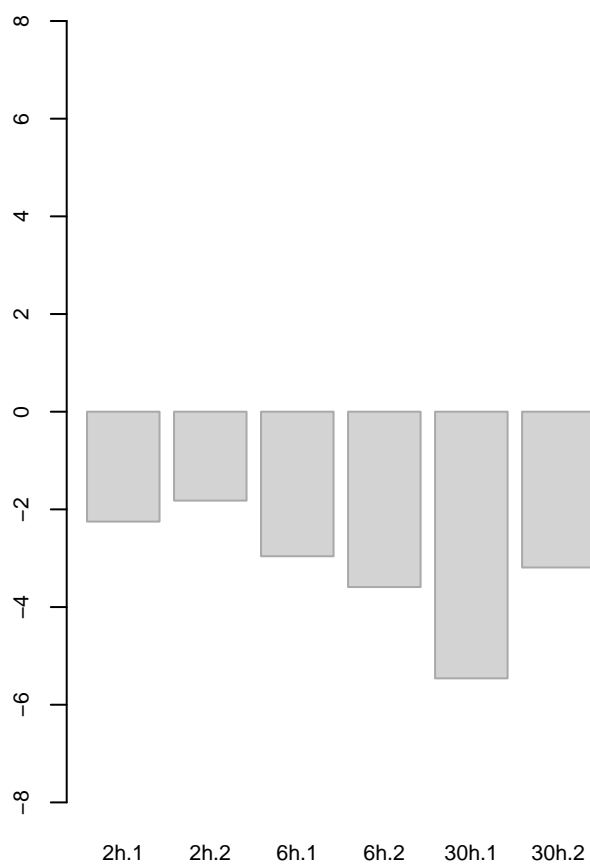

**AT1G05250**

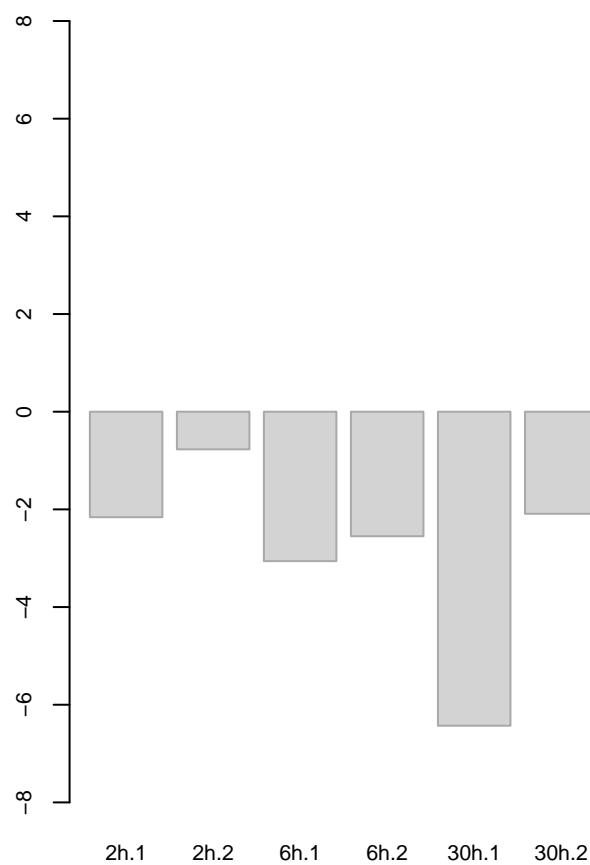

**AT1G07730**

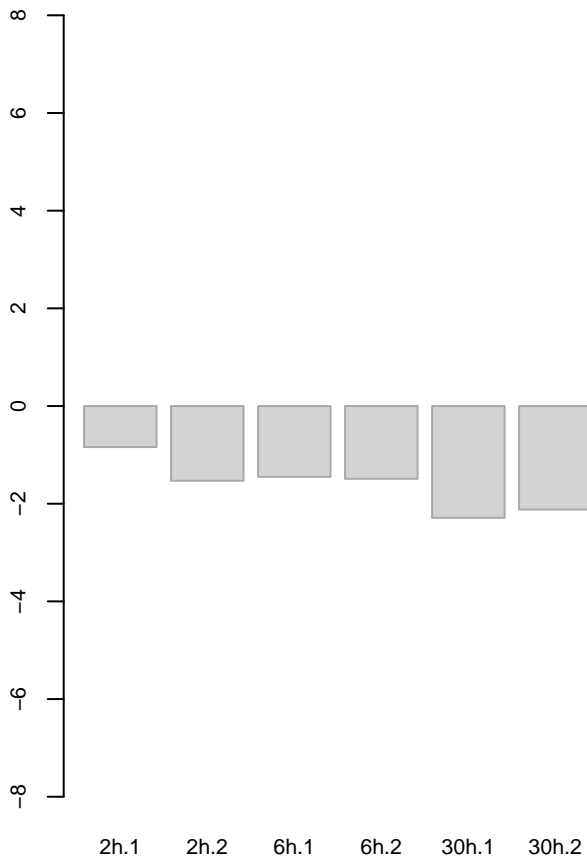

**AT1G07740**

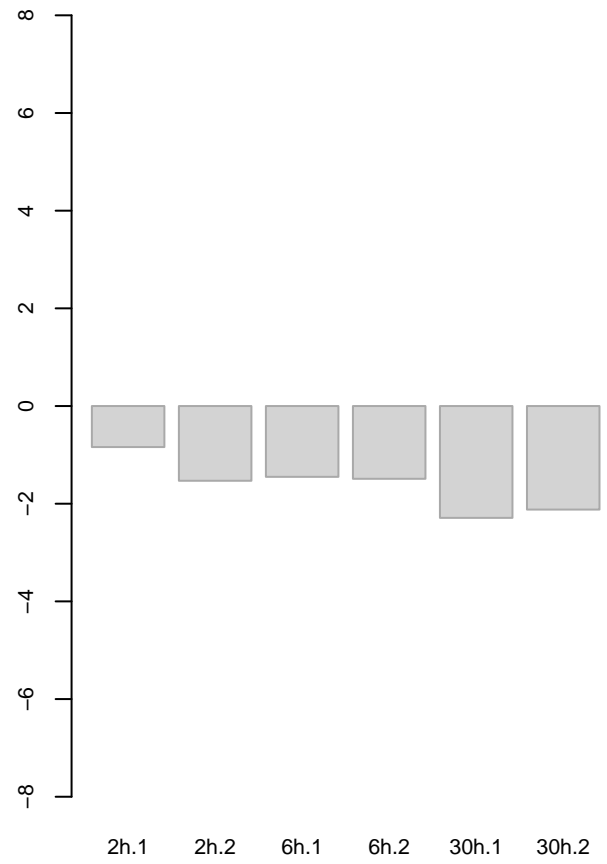

**AT1G11540**

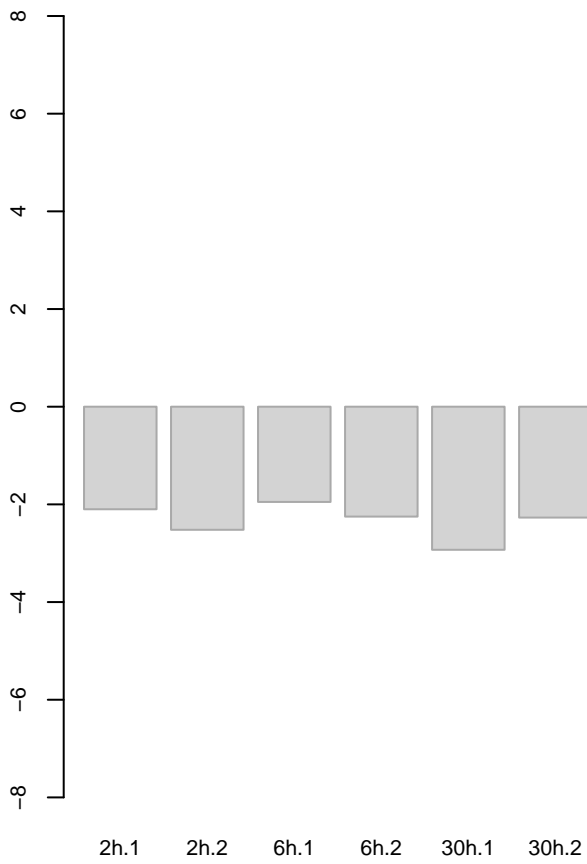

**AT1G11580**

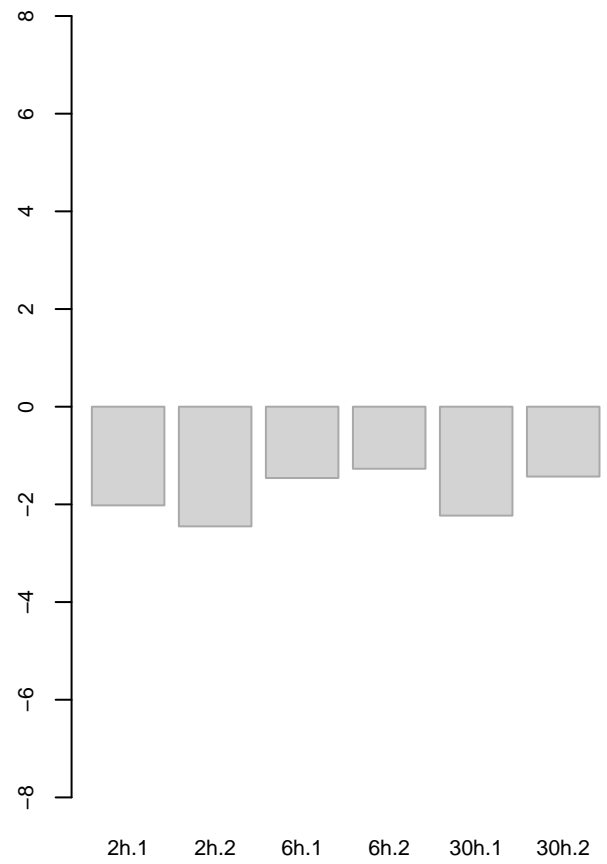

**AT1G12080**

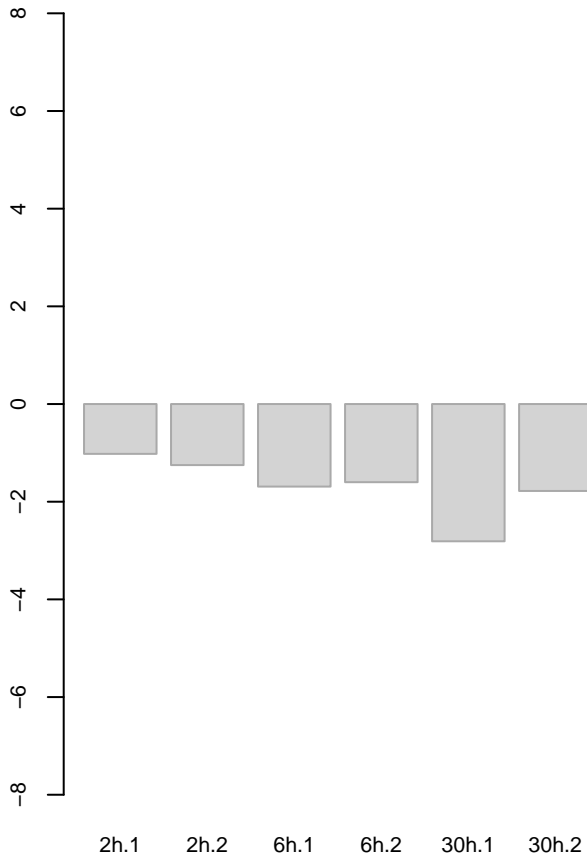

**AT1G12560**

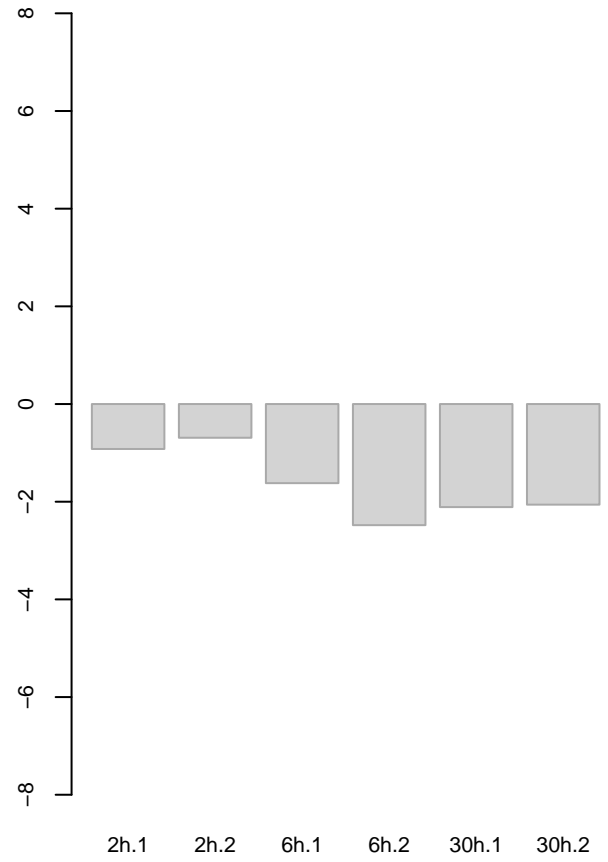

**AT1G12940**

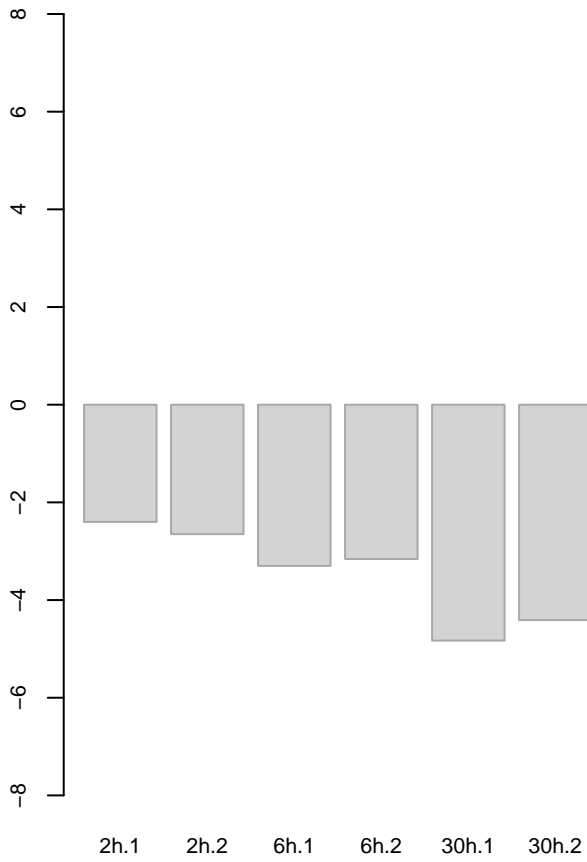

**AT1G13340**

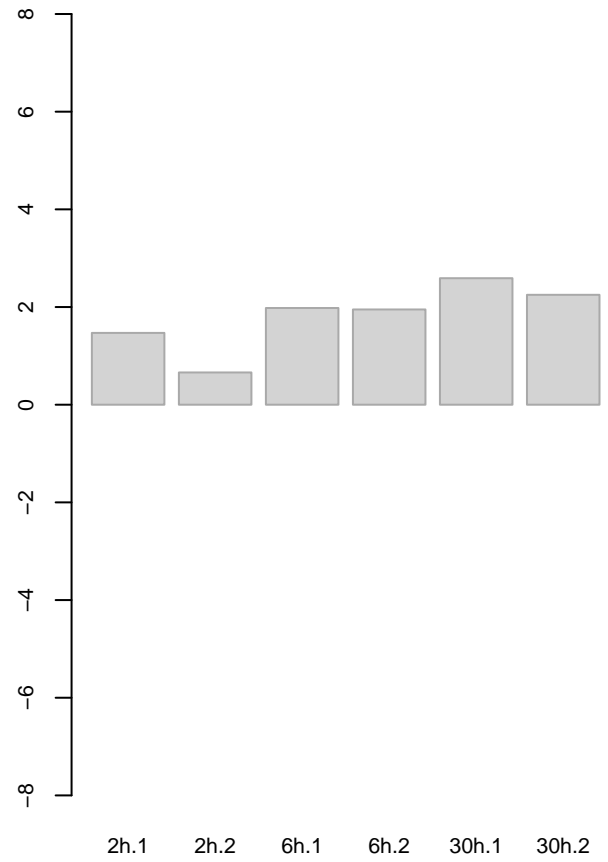

**AT1G17420**

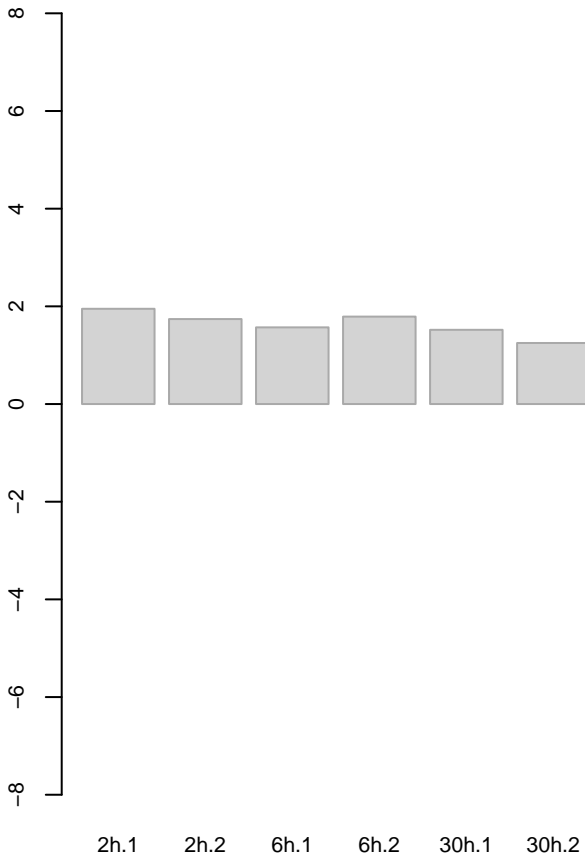

**AT1G23720**

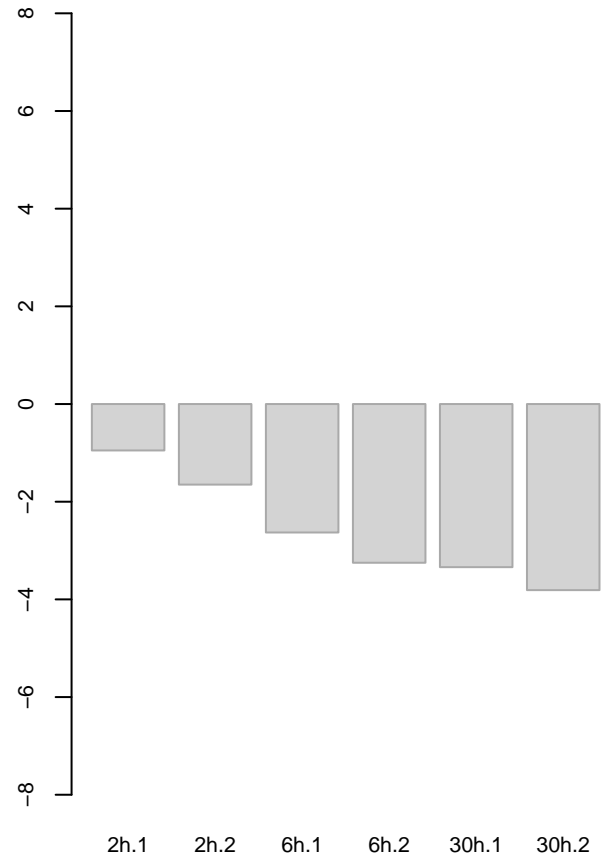

**AT1G25400**

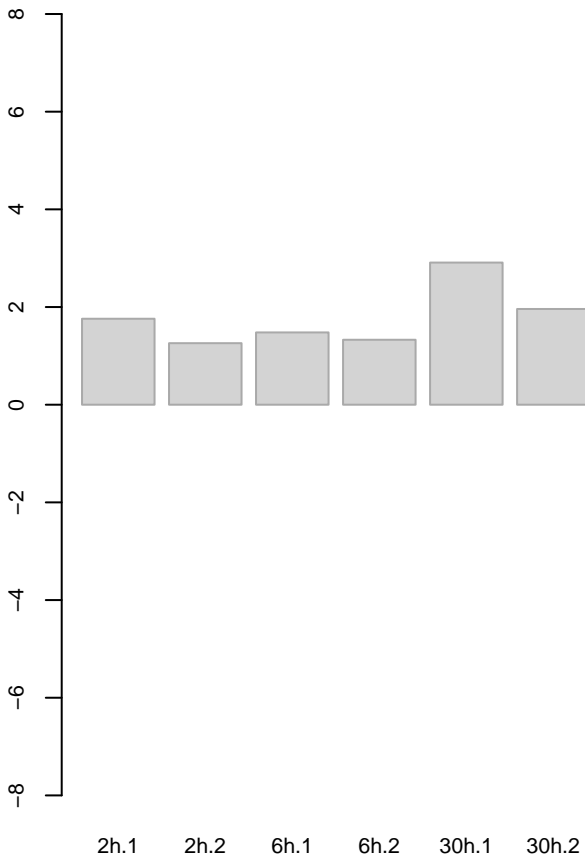

**AT1G27100**

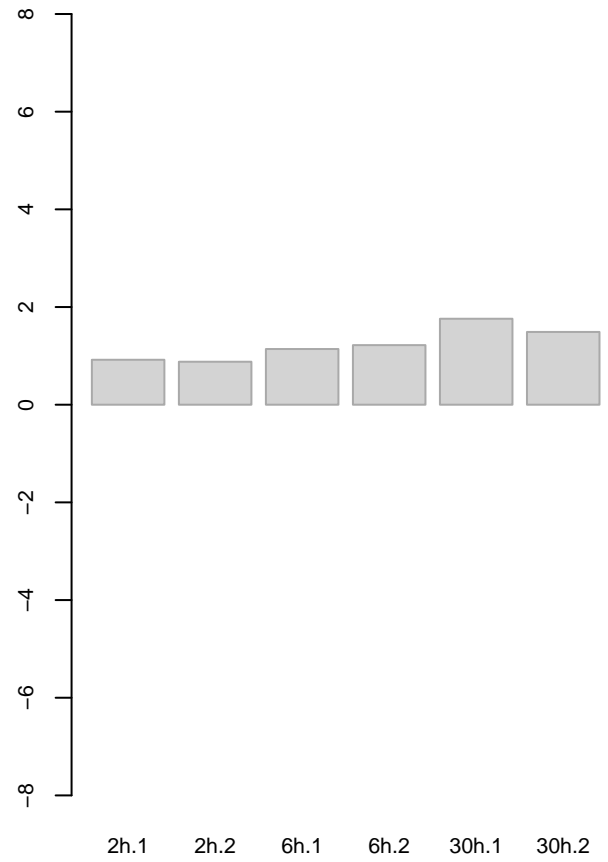

**AT1G27100**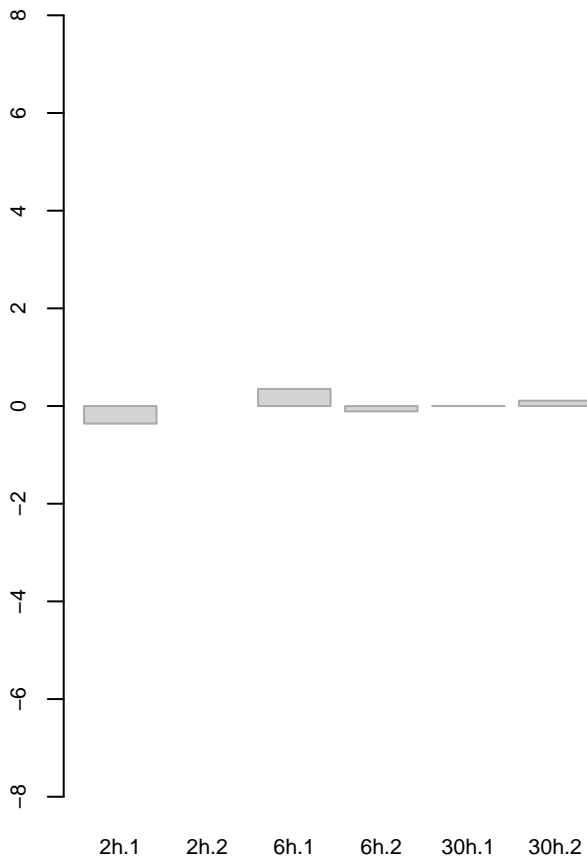**AT1G30870**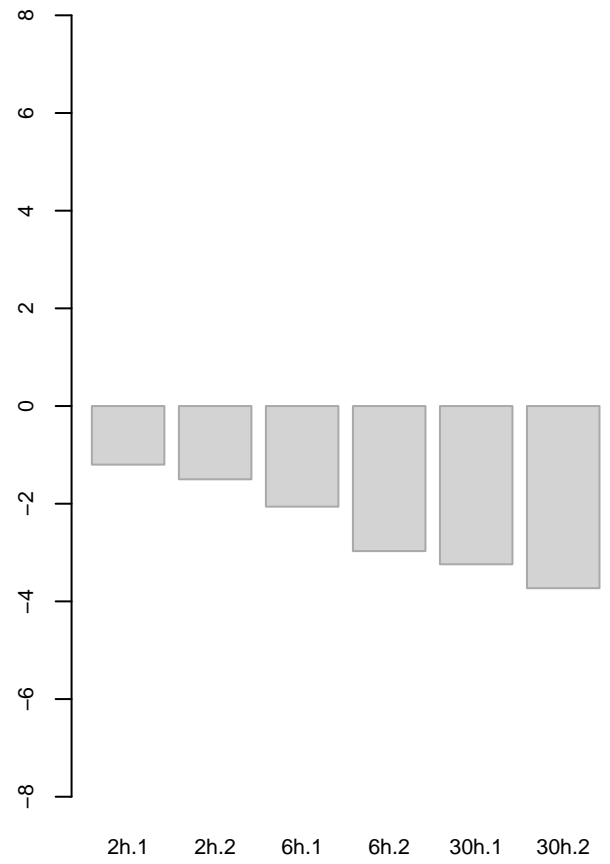**AT1G33110**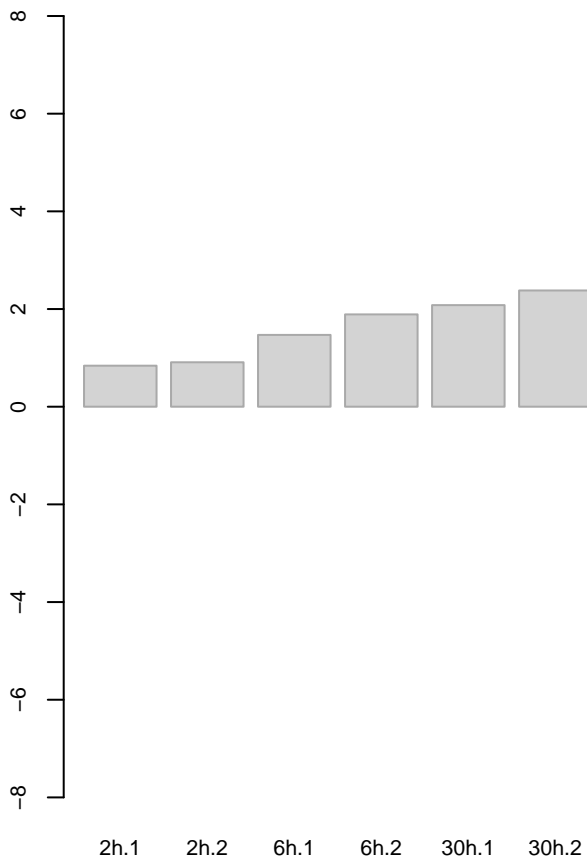**AT1G33900**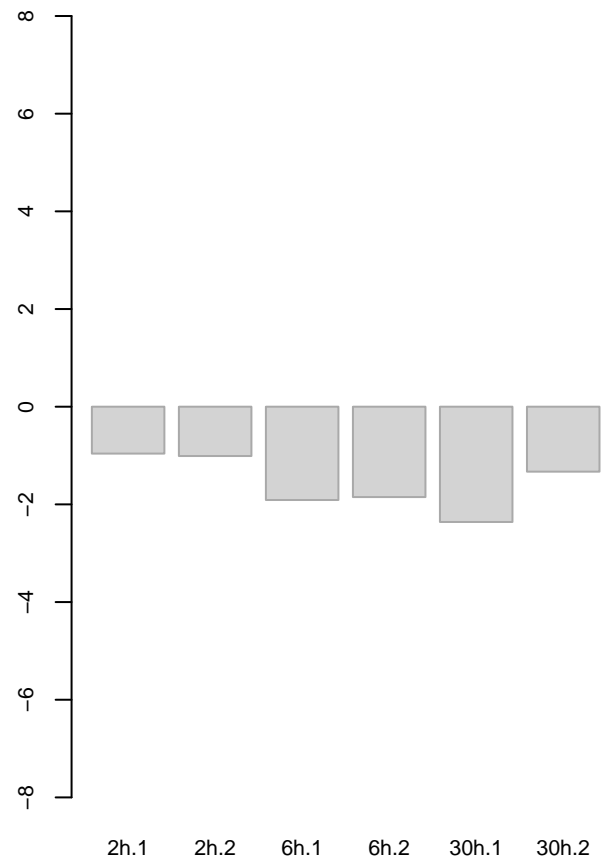

**AT1G52200**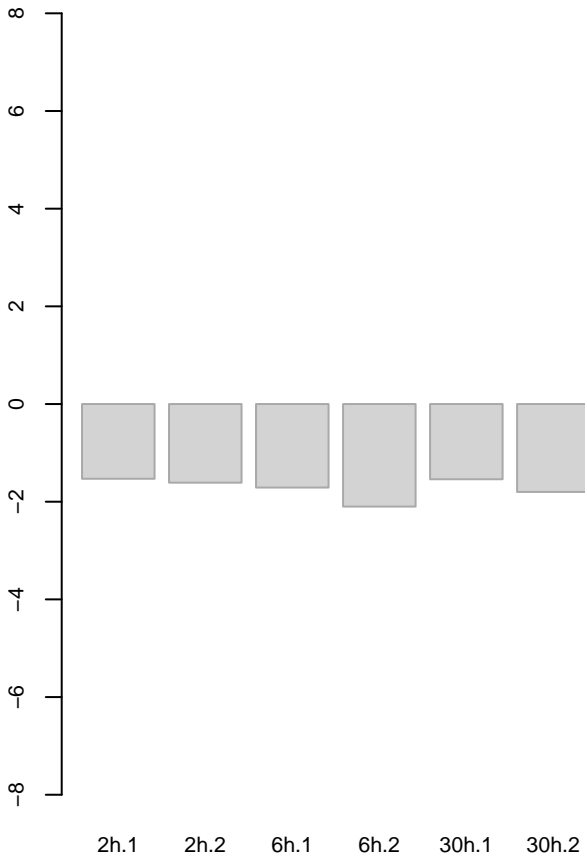**AT1G53130**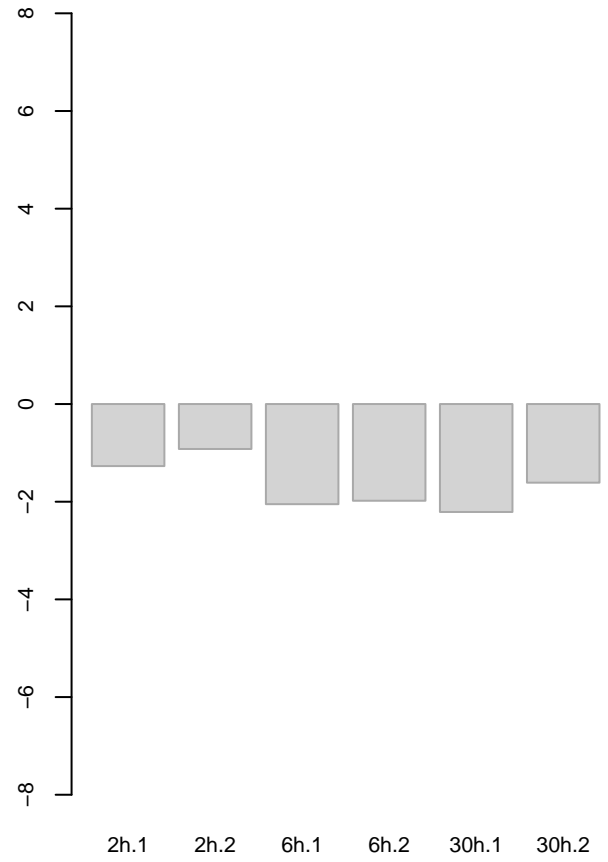**AT1G59590**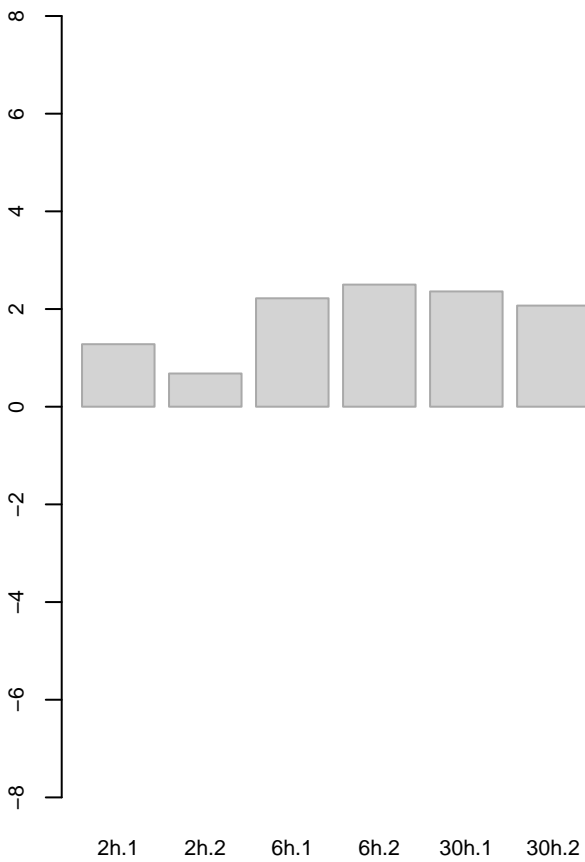**AT1G61340**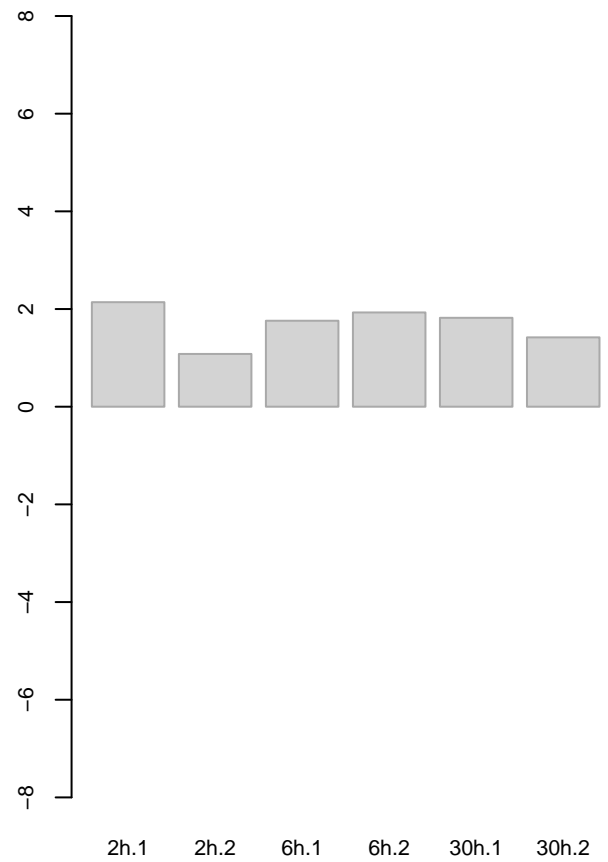

**AT1G69840**

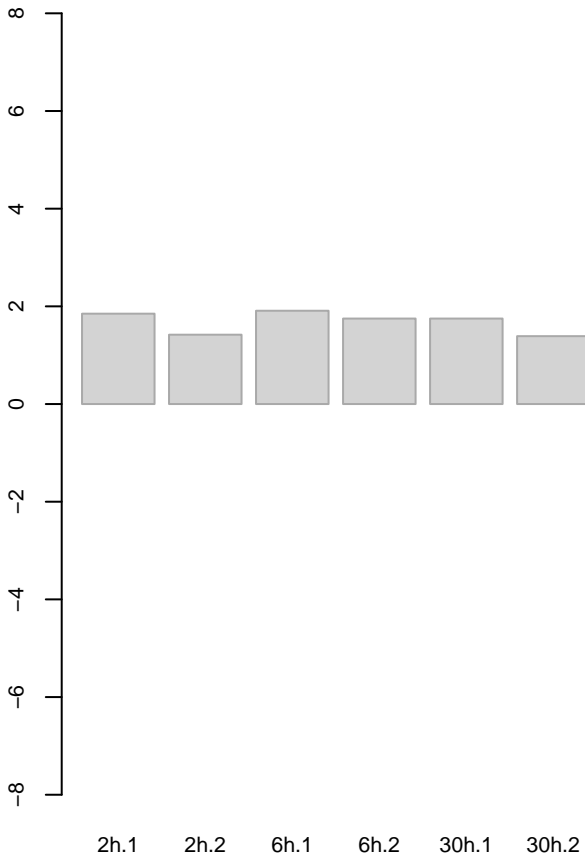

**AT1G74710**

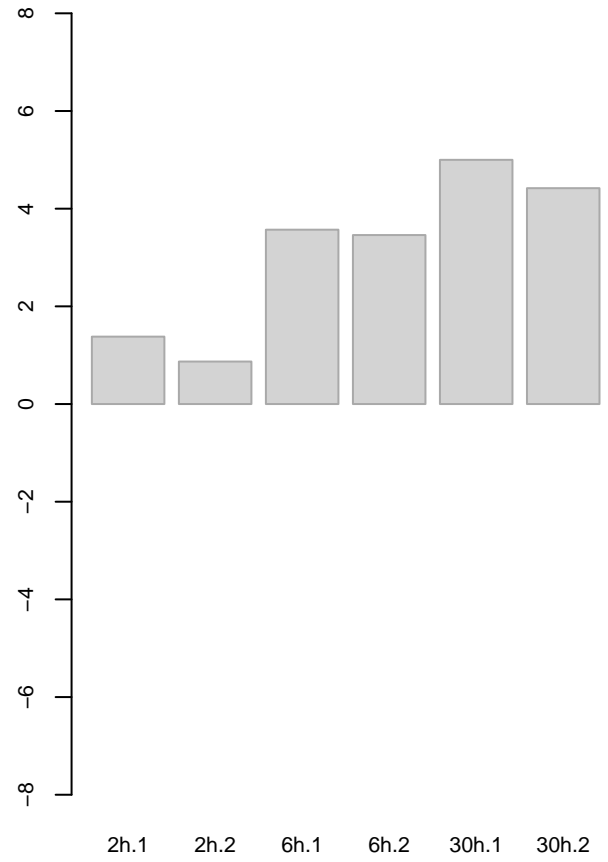

**AT1G77330**

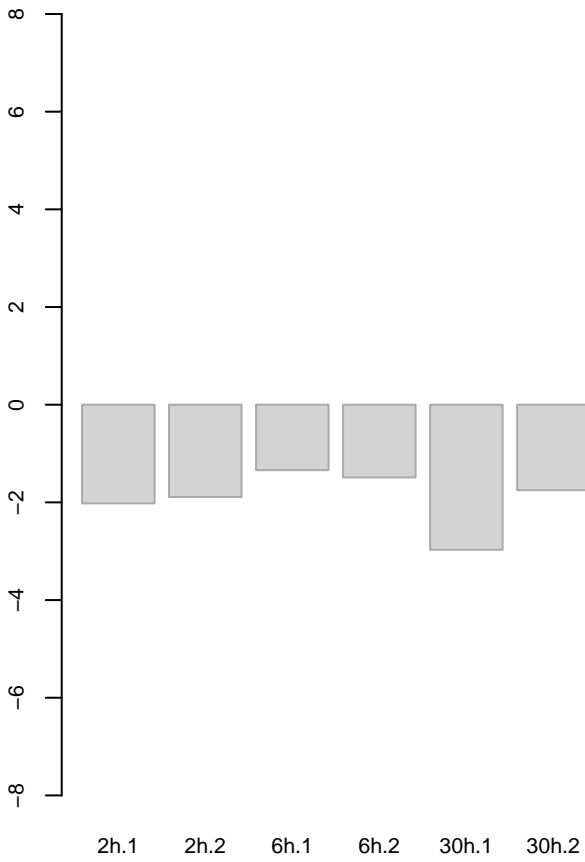

**AT1G78260**

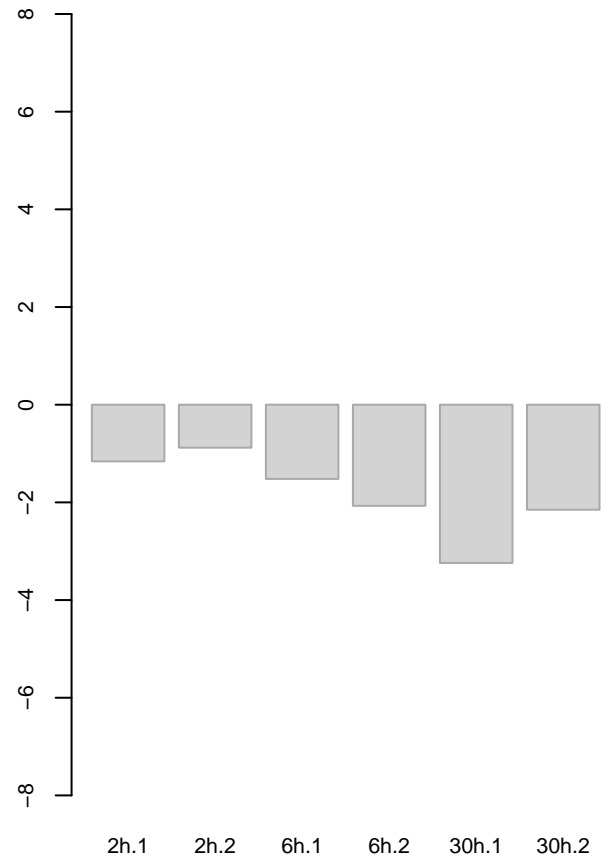

**AT1G80110**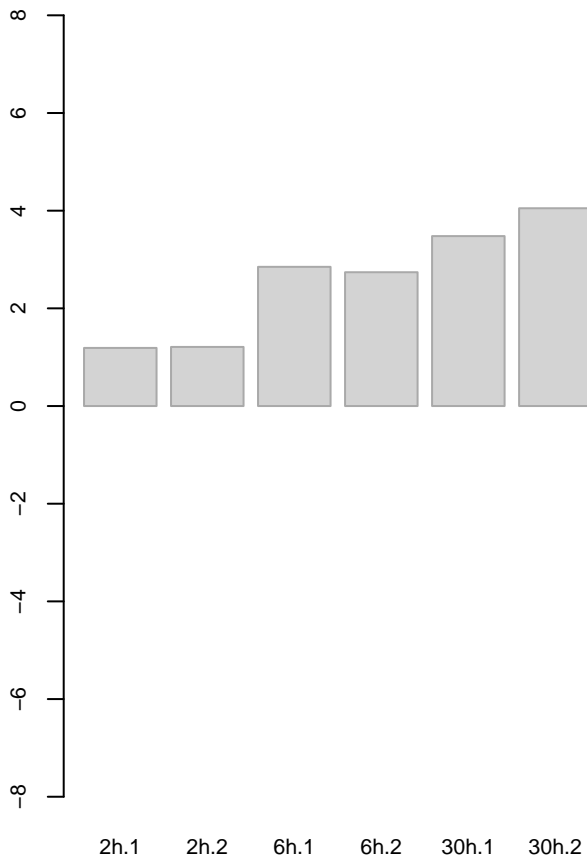**AT1G80590**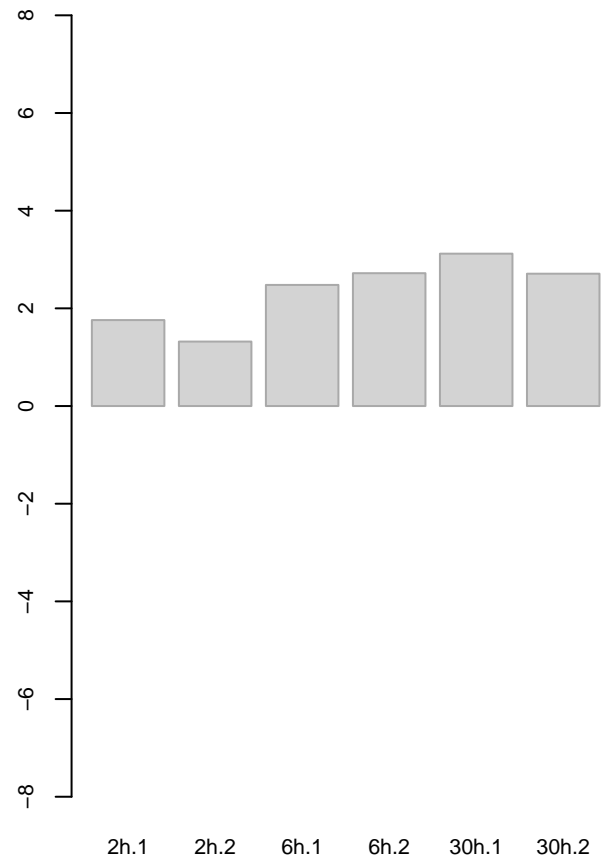**AT2G03505**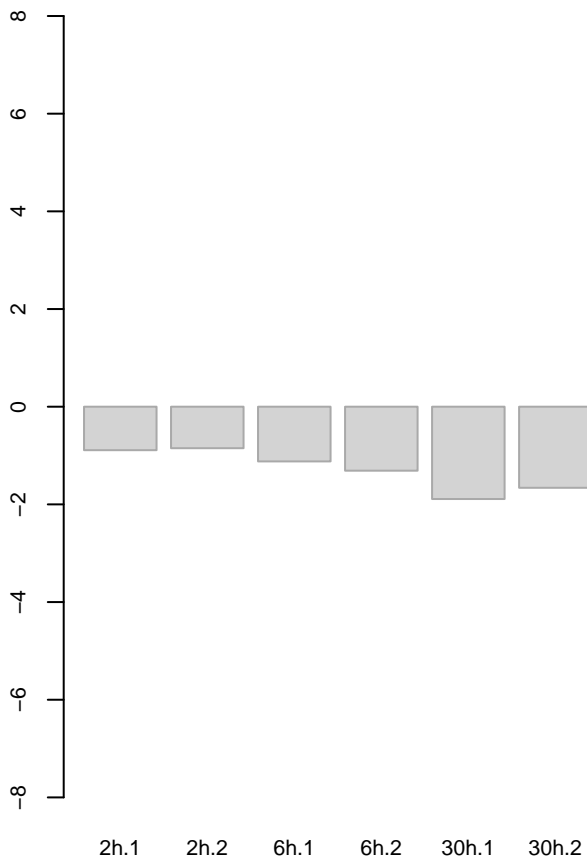**AT2G15490**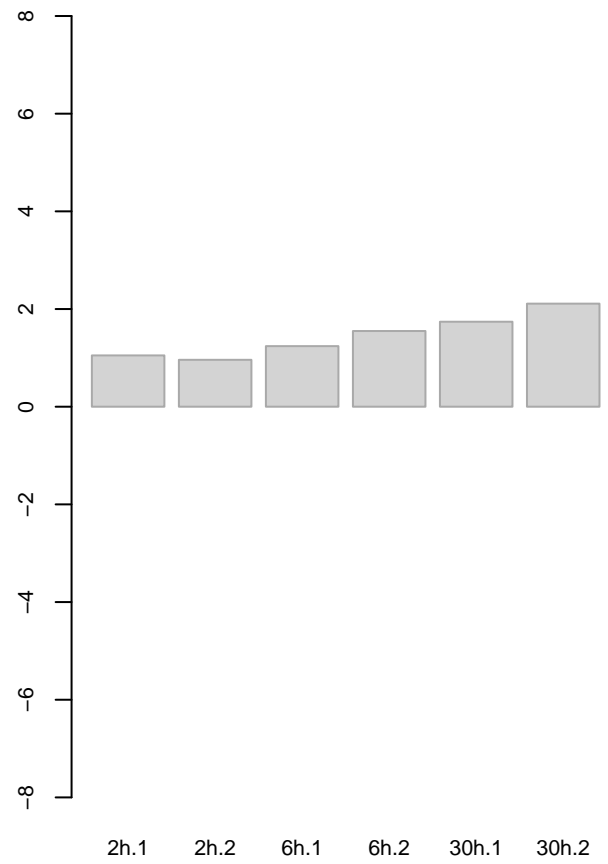



**AT2G18193**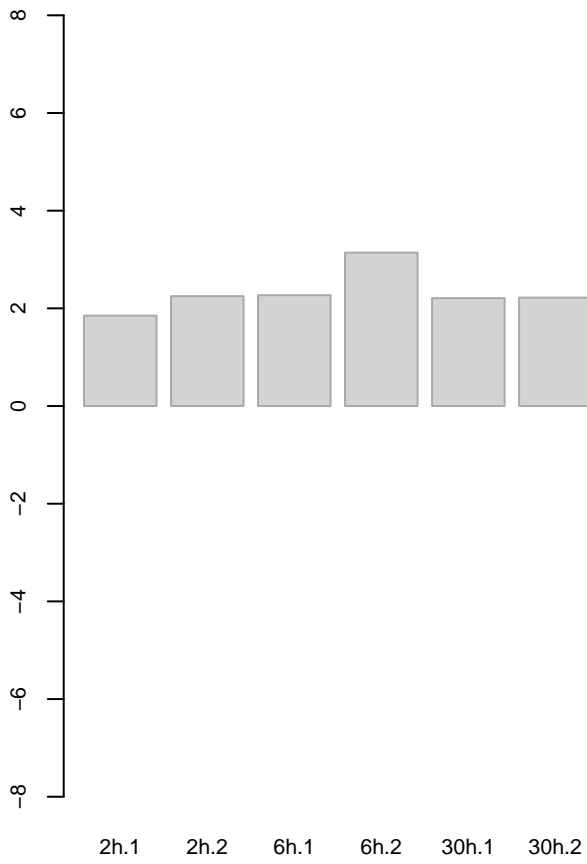**AT2G18700**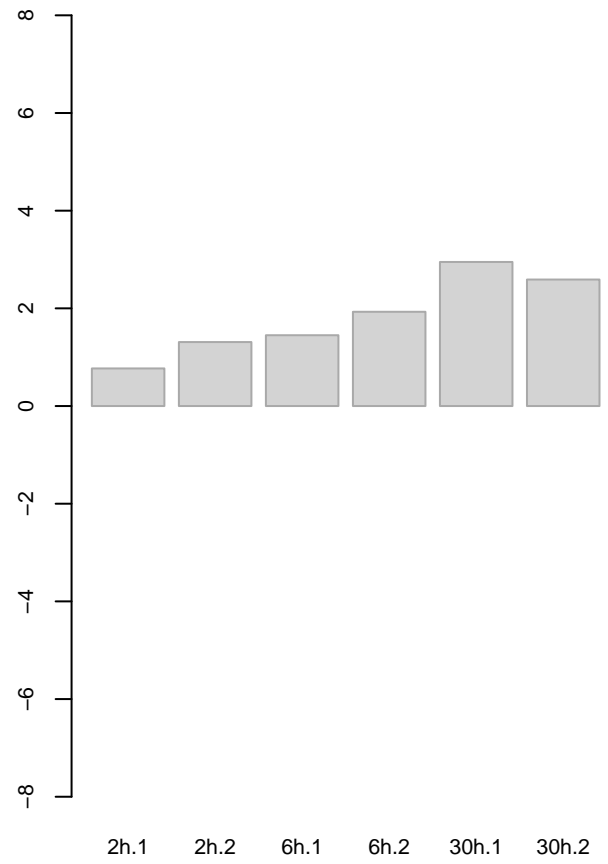**AT2G20142**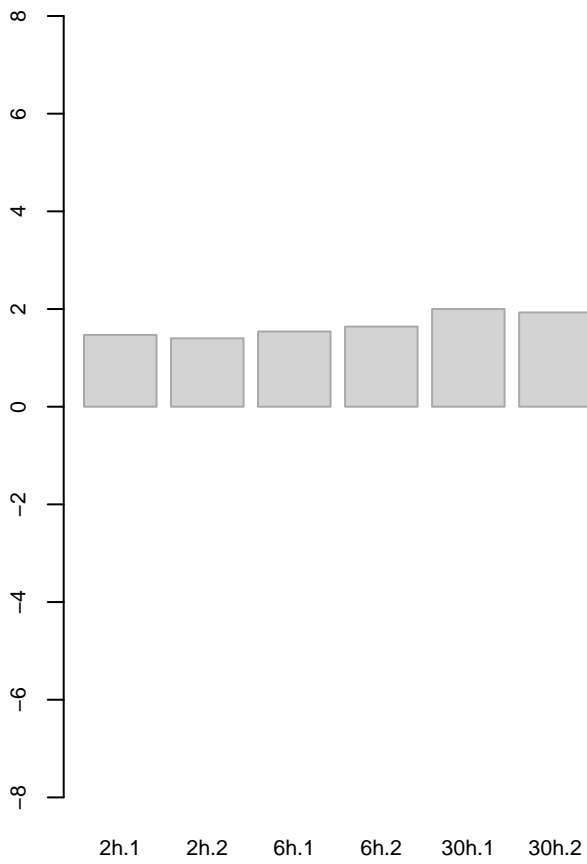**AT2G20515**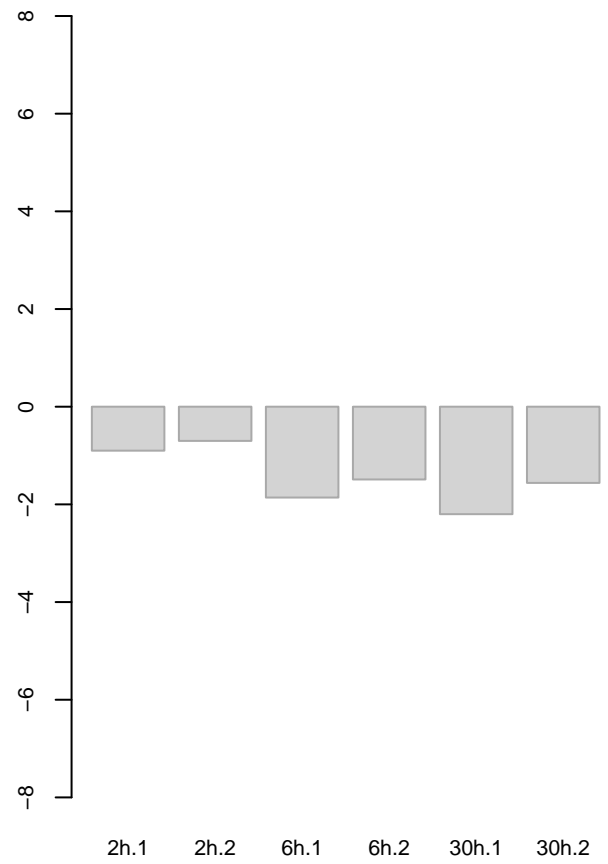

**AT2G23170**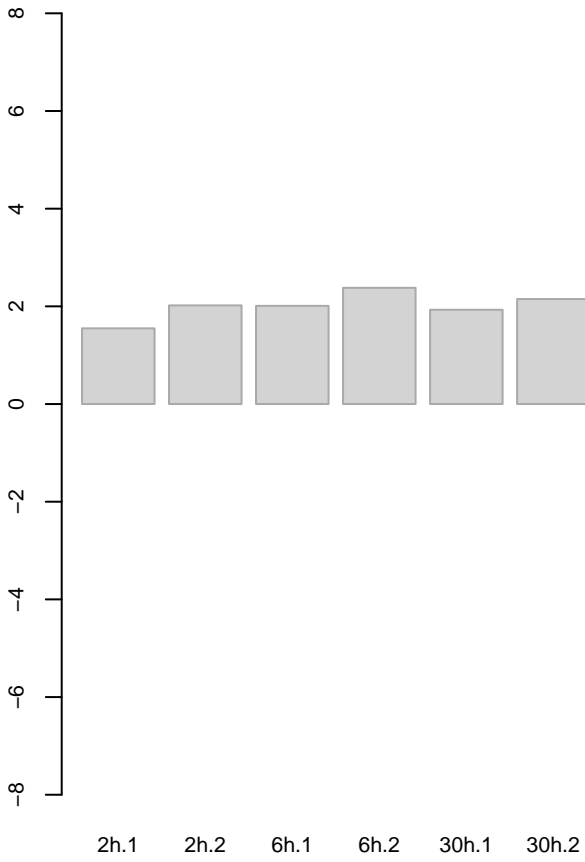**AT2G25810**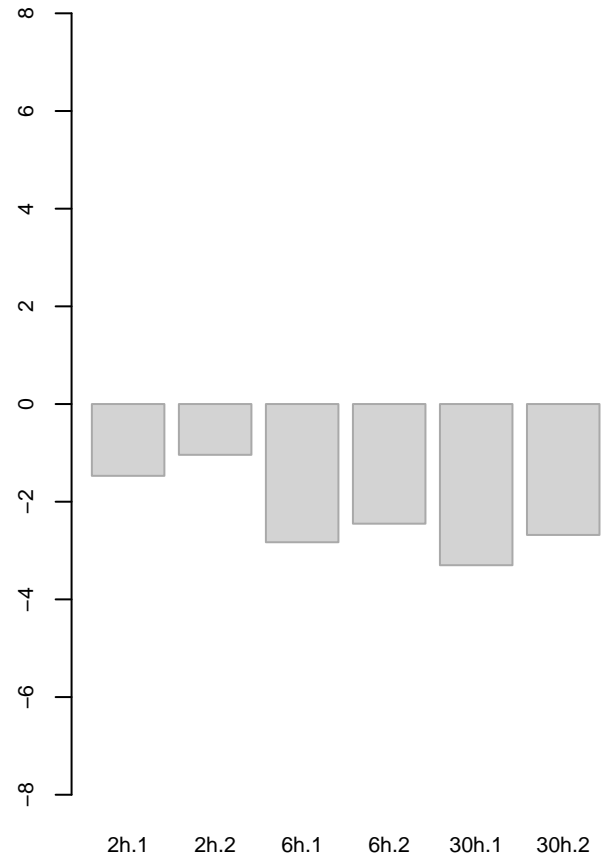**AT2G28670**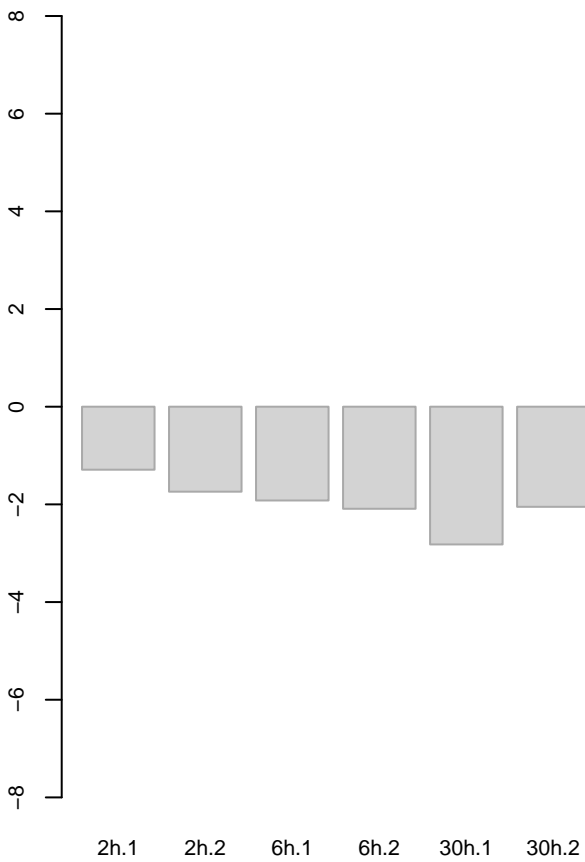**AT2G34390**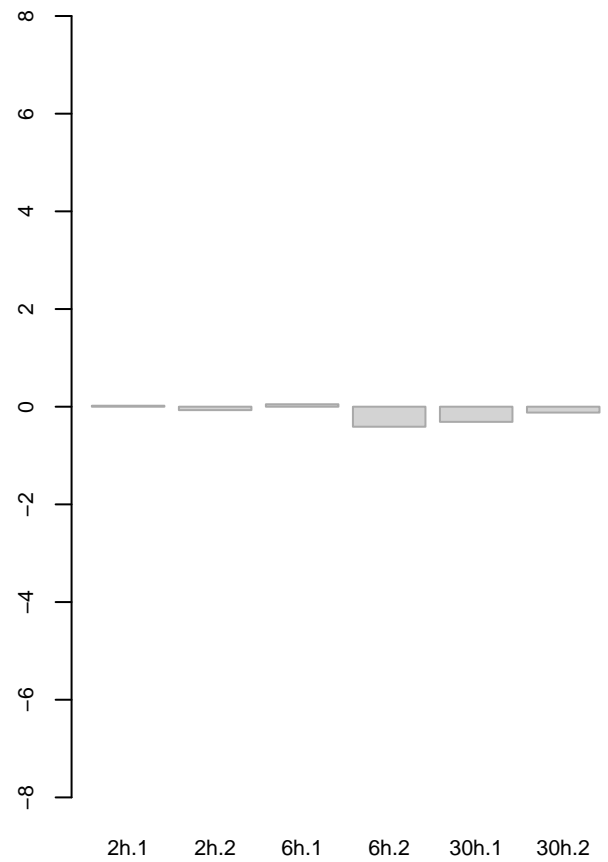

**AT2G34390**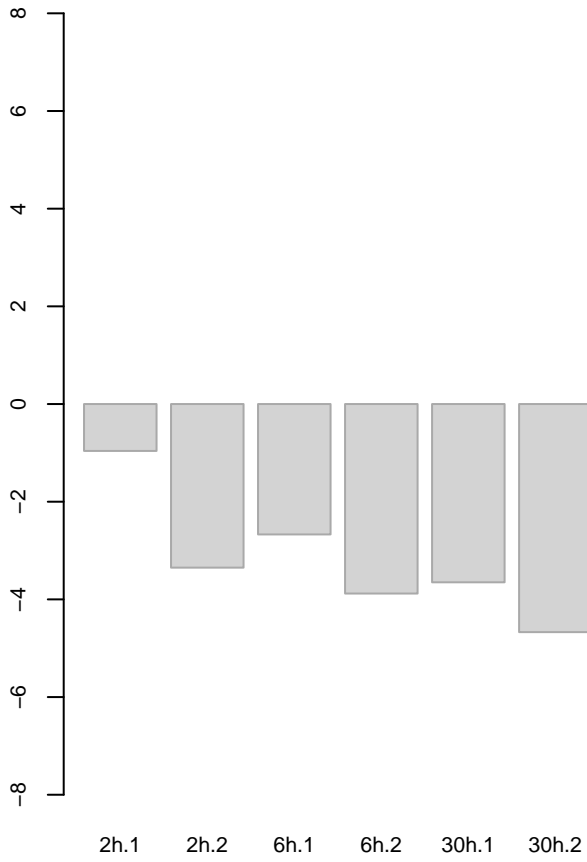**AT2G34650**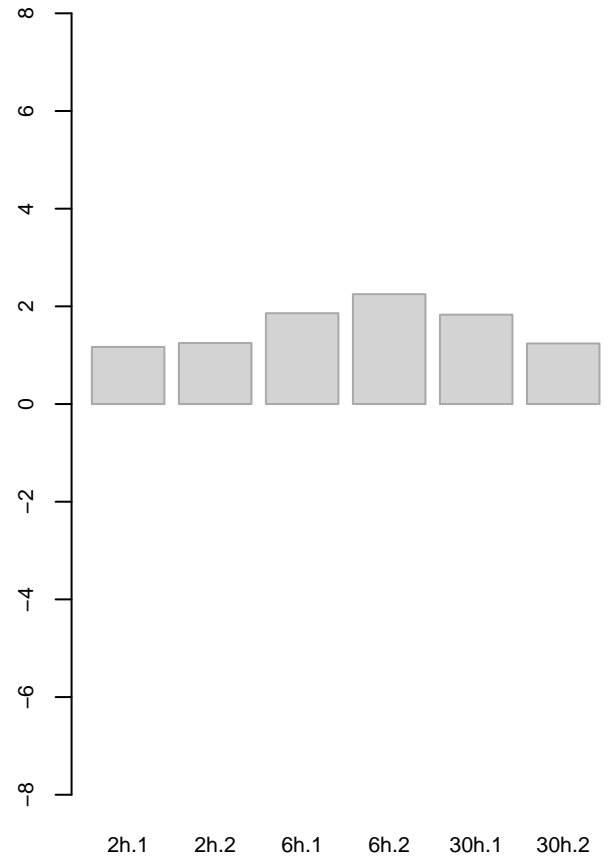**AT2G35980**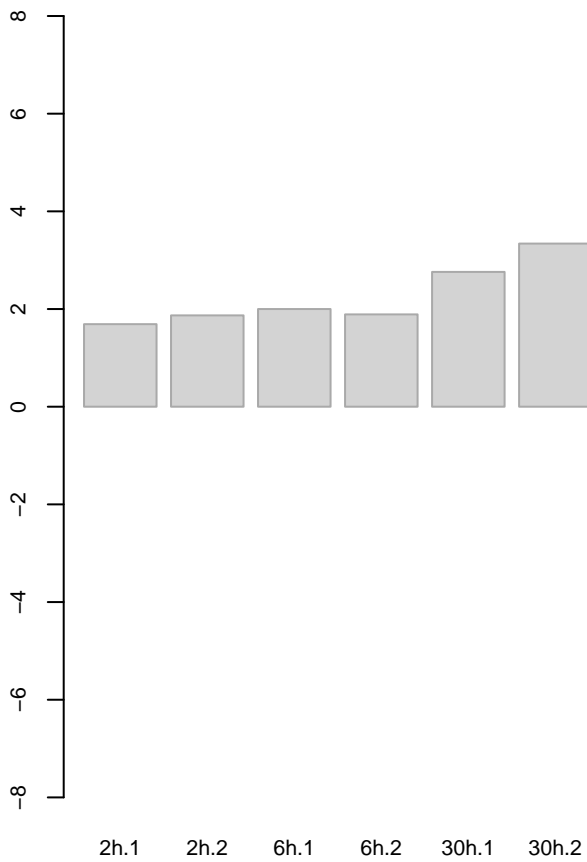**AT2G36690**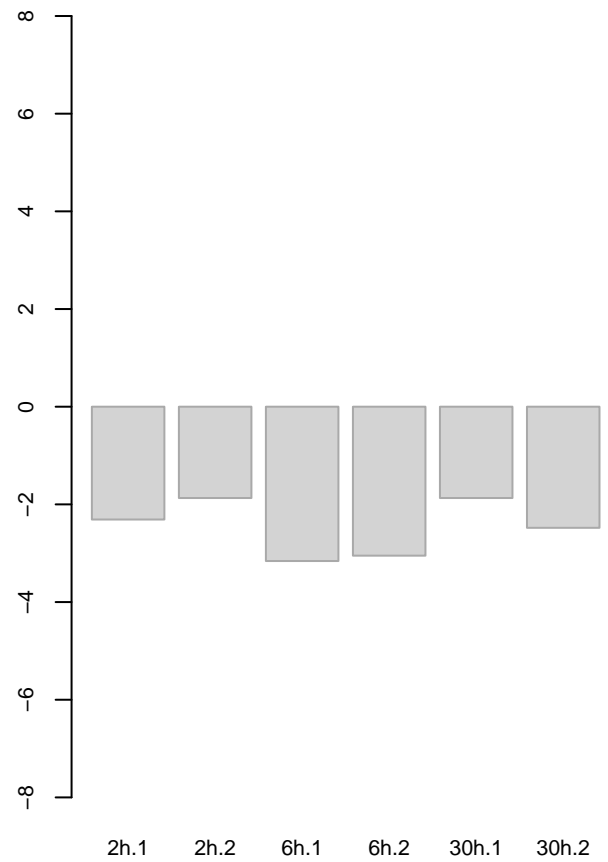

**AT2G36690**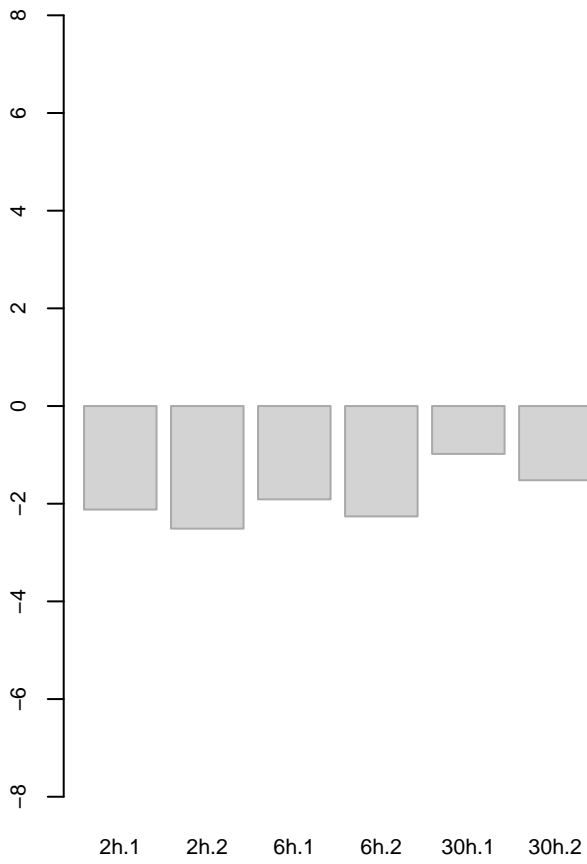**AT2G44370**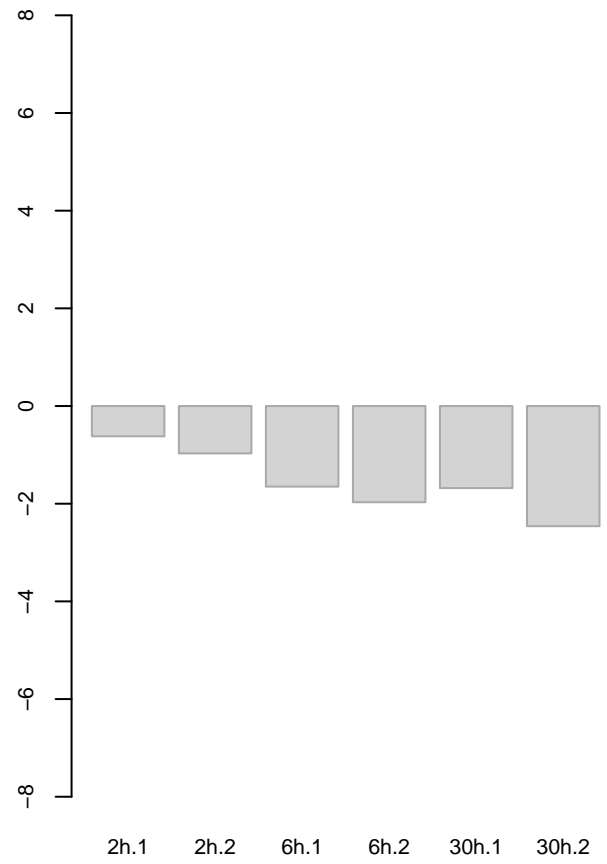**AT2G46400**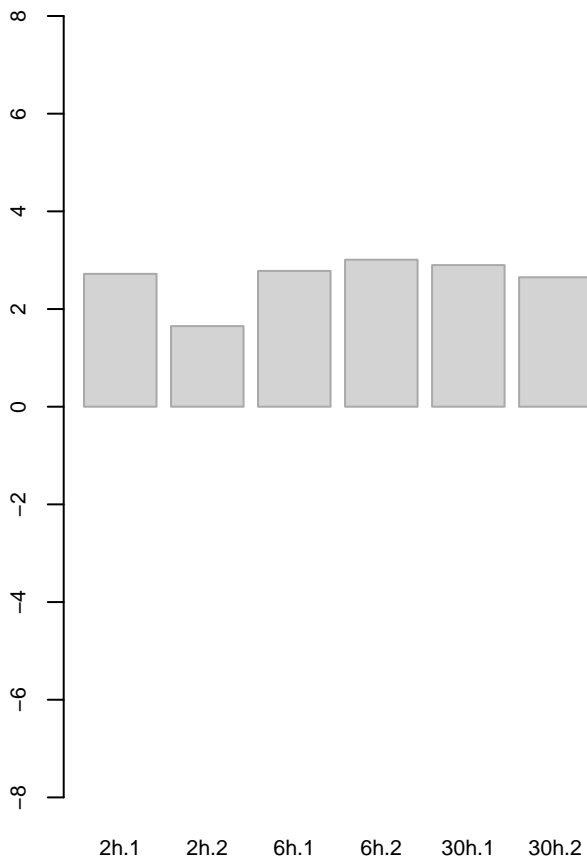**AT2G46680**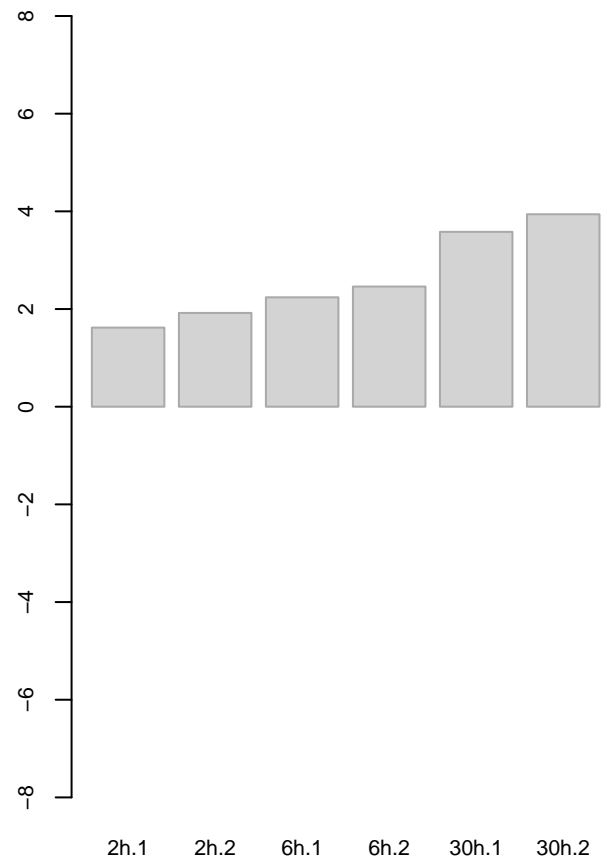

**AT2G47140**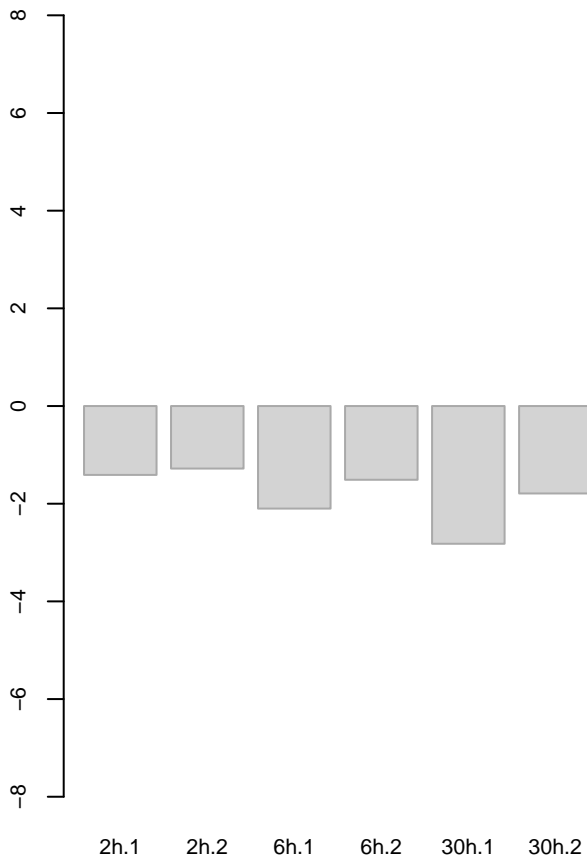**AT2G47540**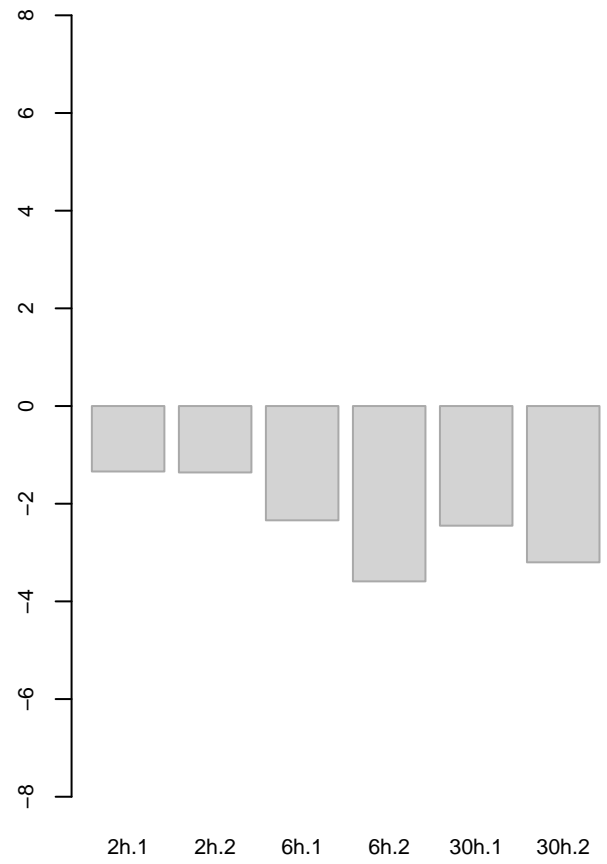**AT3G01190**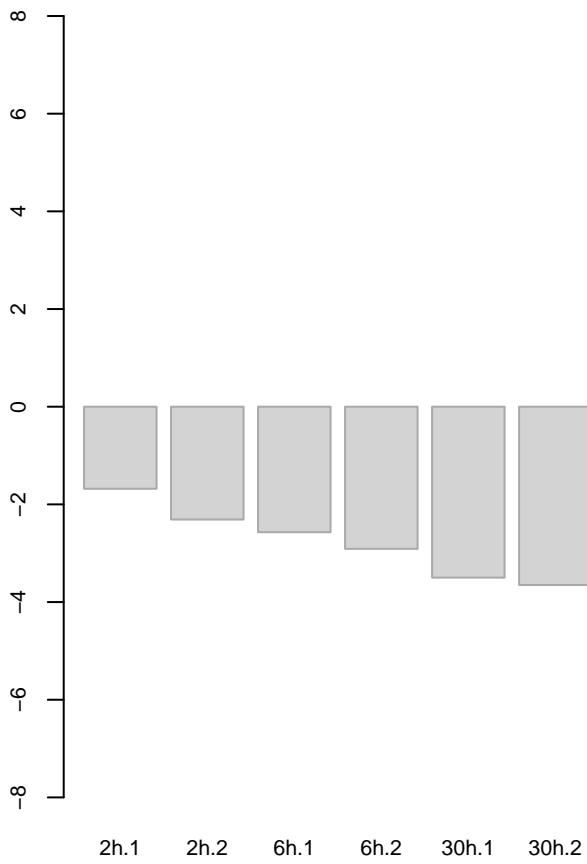**AT3G02240**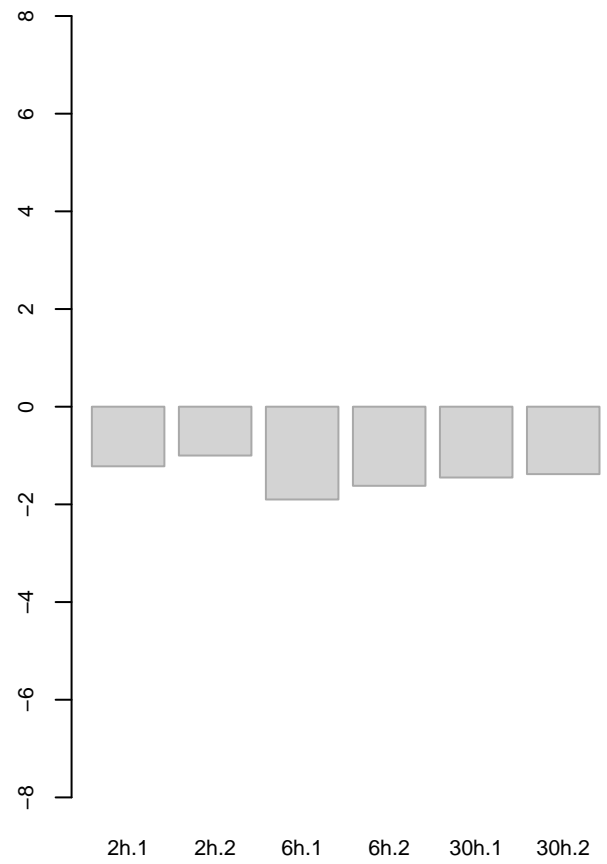

**AT3G09270**

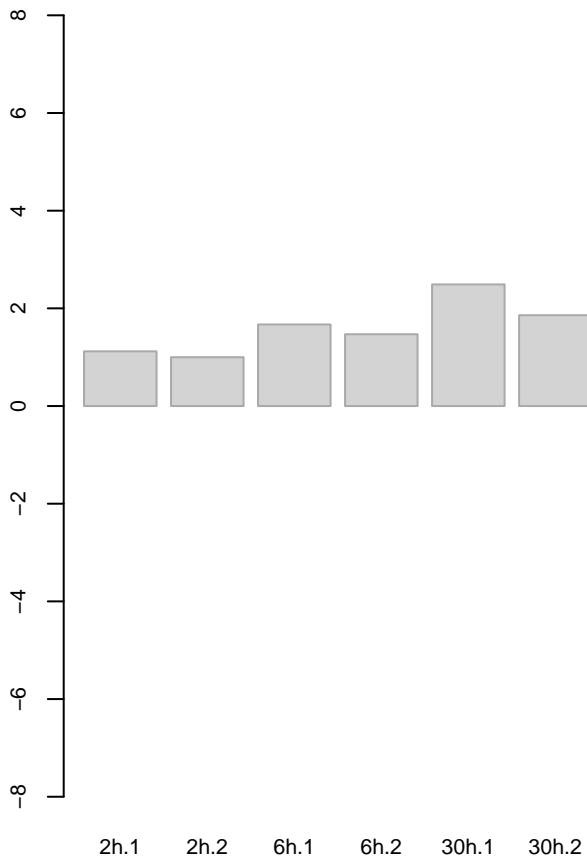

**AT3G11550**

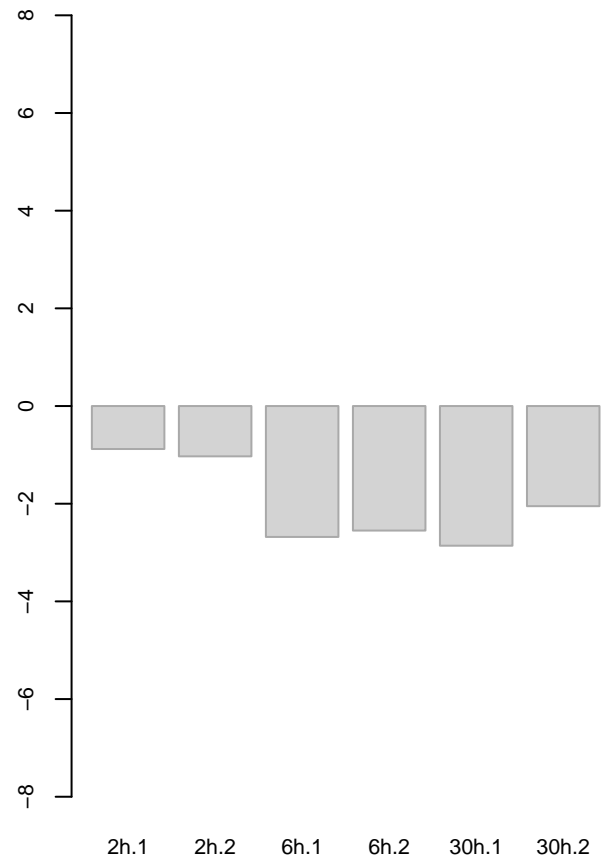

**AT3G12050**

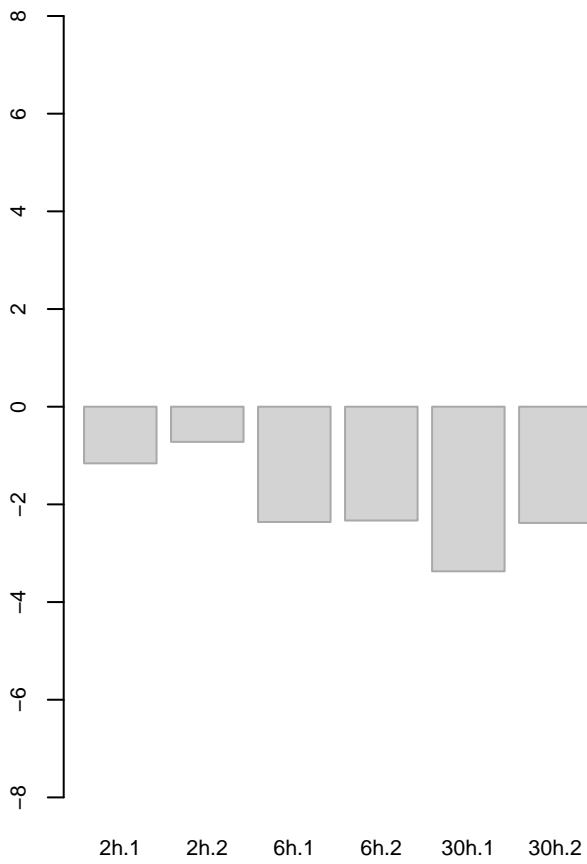

**AT3G15500**

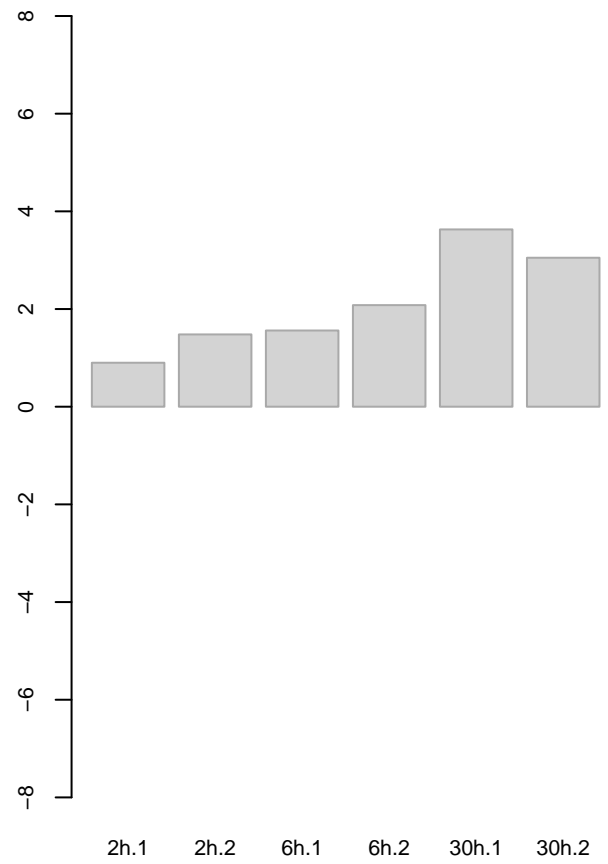

**AT3G17790**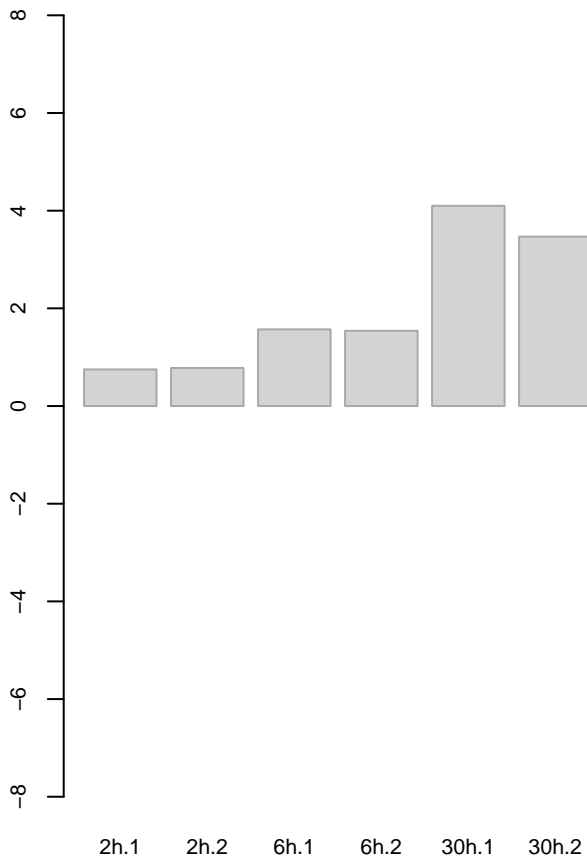**AT3G17790**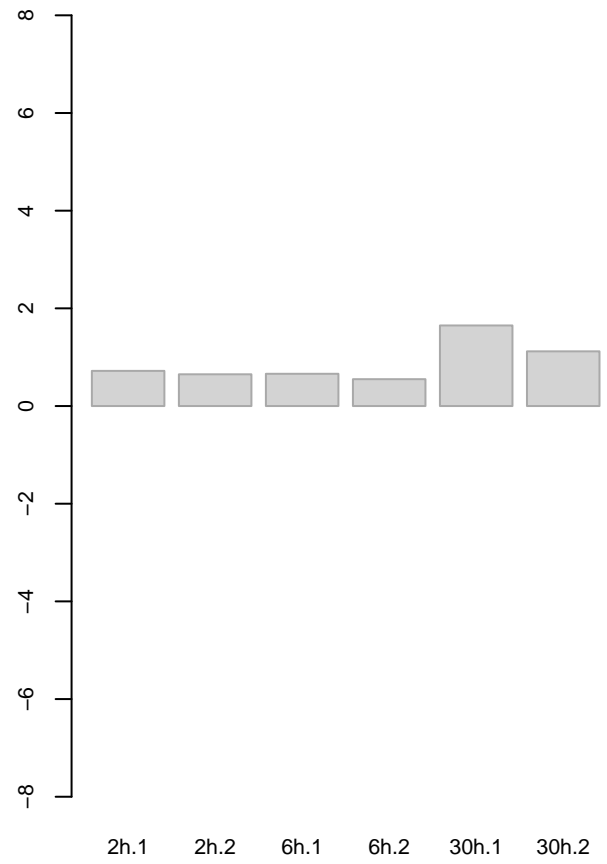**AT3G19450**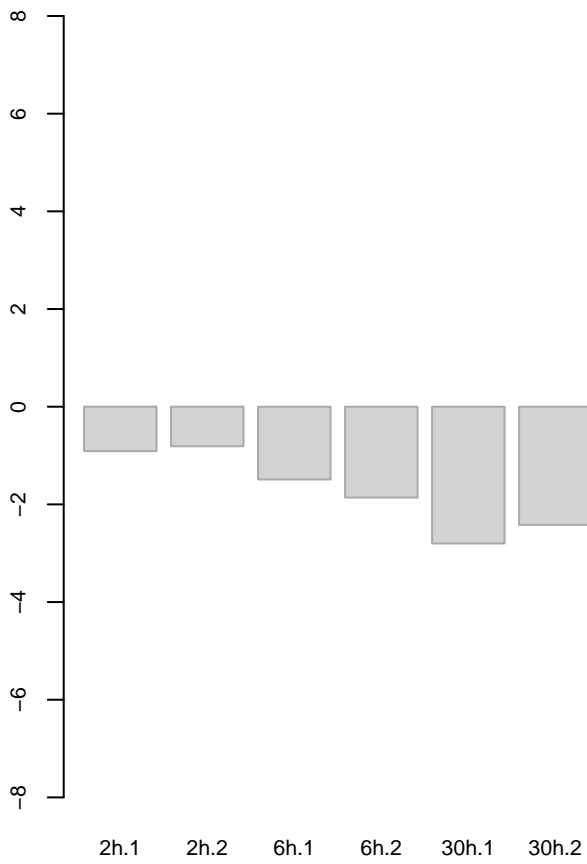**AT3G19990**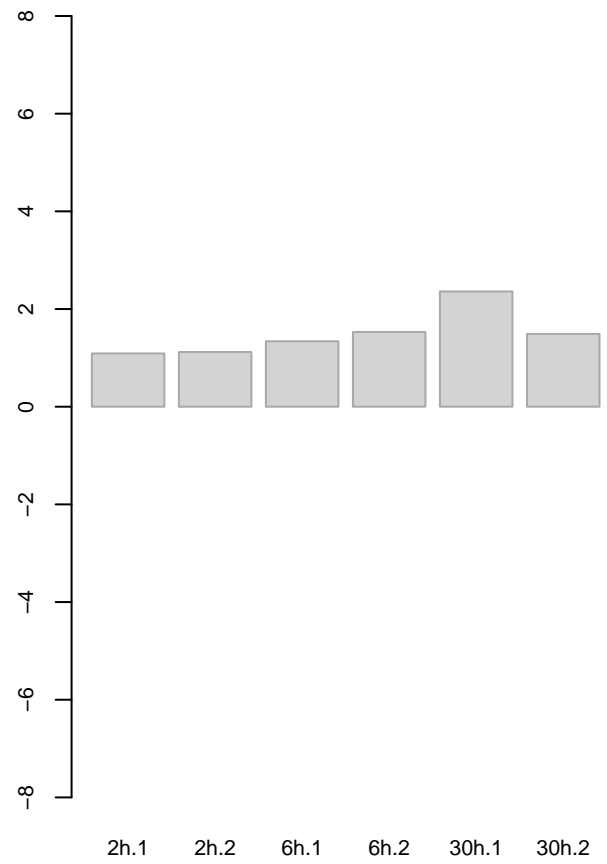

**AT3G24503**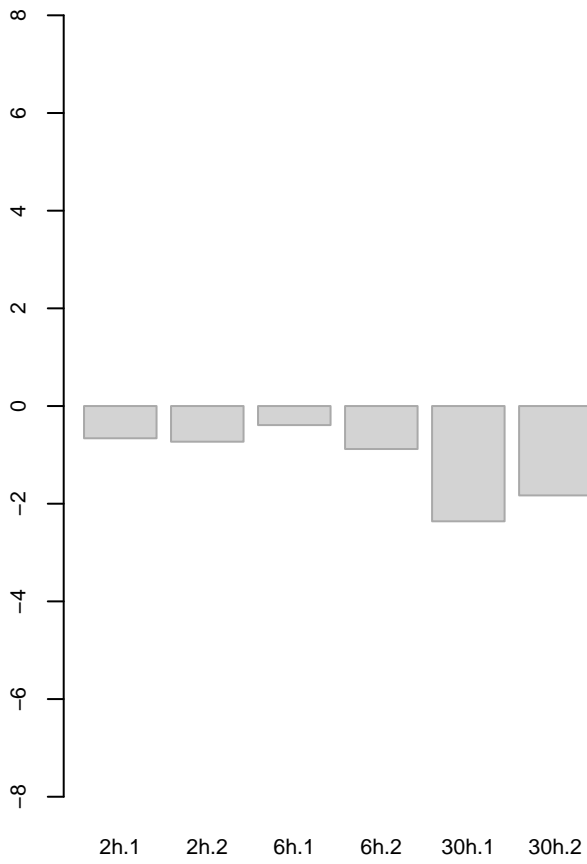**AT3G24503**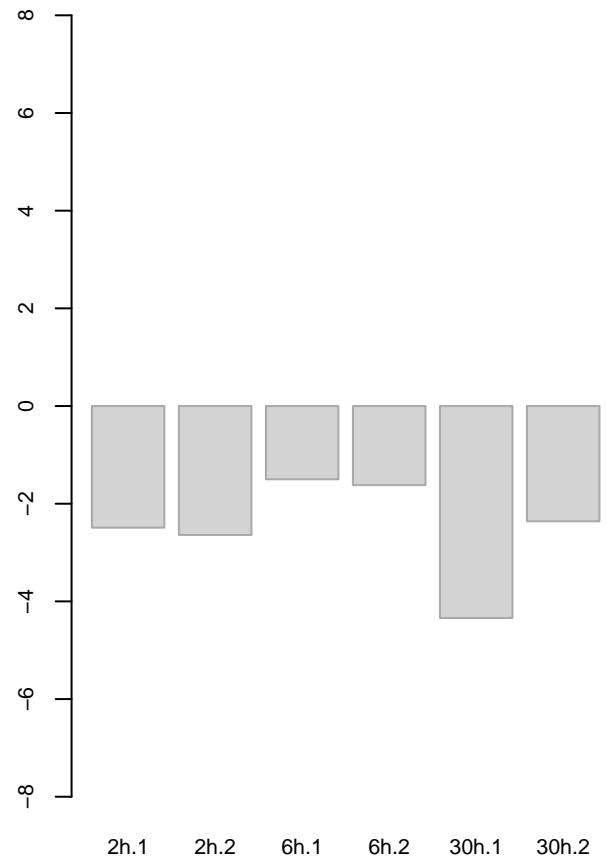**AT3G25882**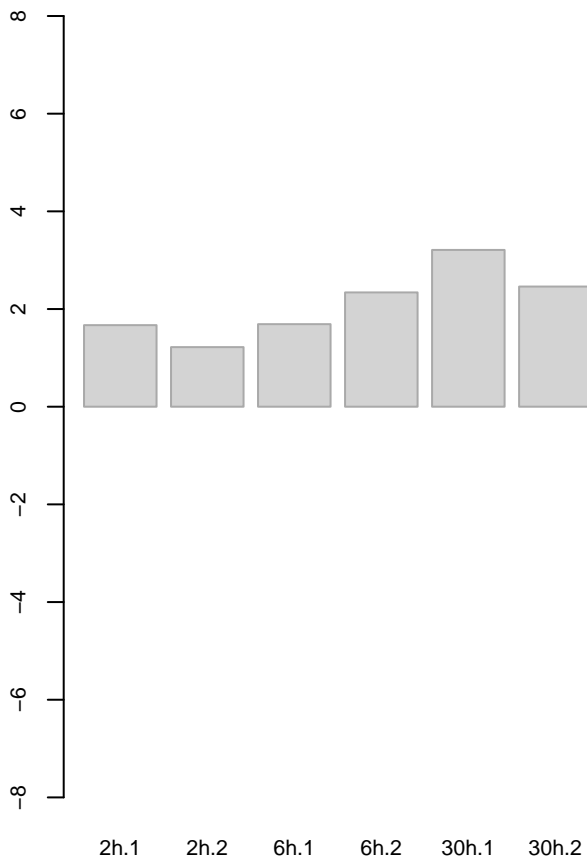**AT3G28550**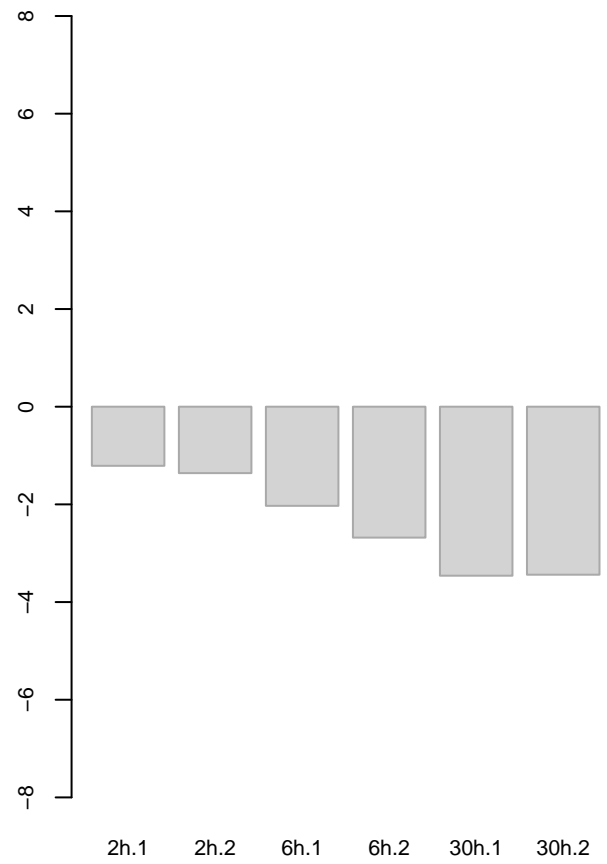



**AT3G29410**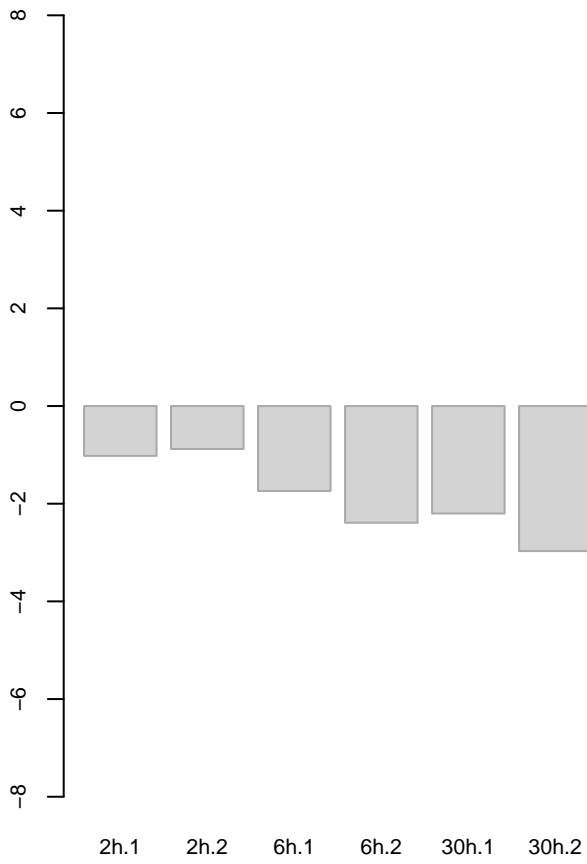**AT3G43800**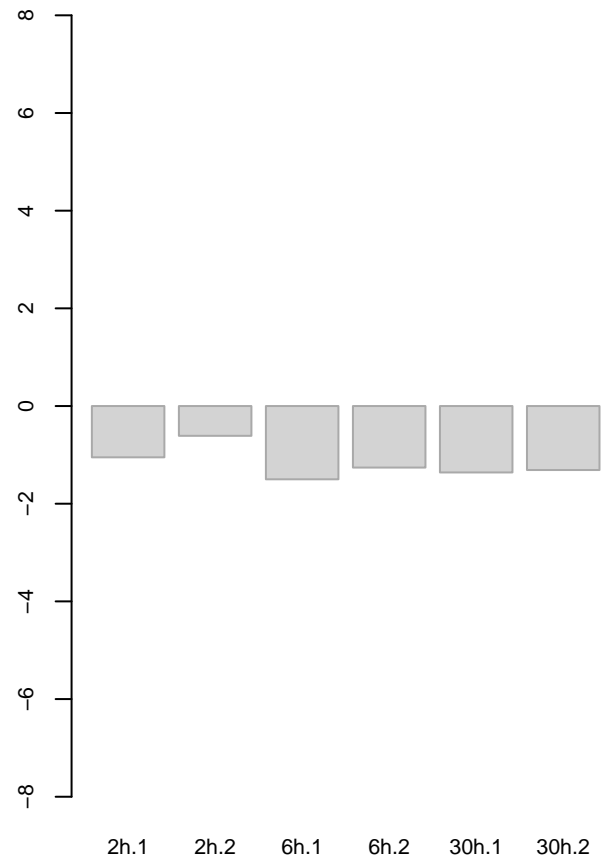**AT3G47340**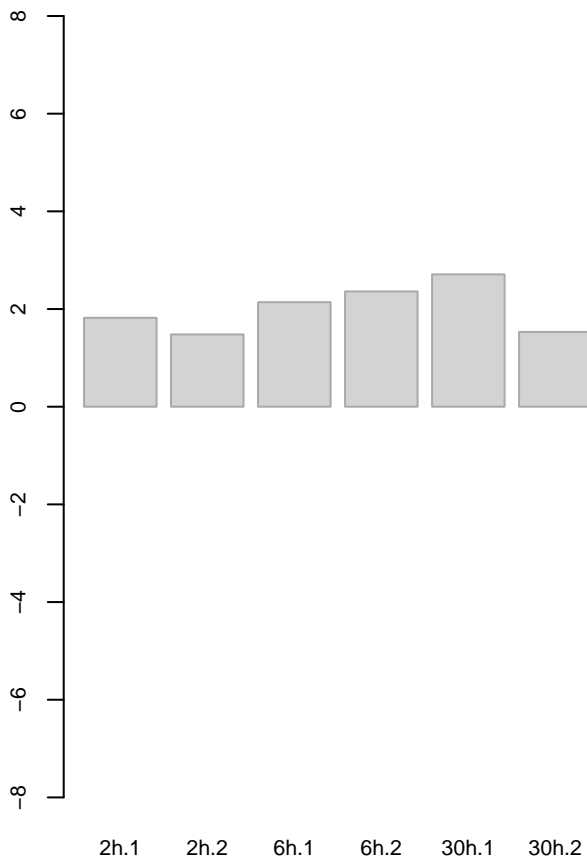**AT3G47480**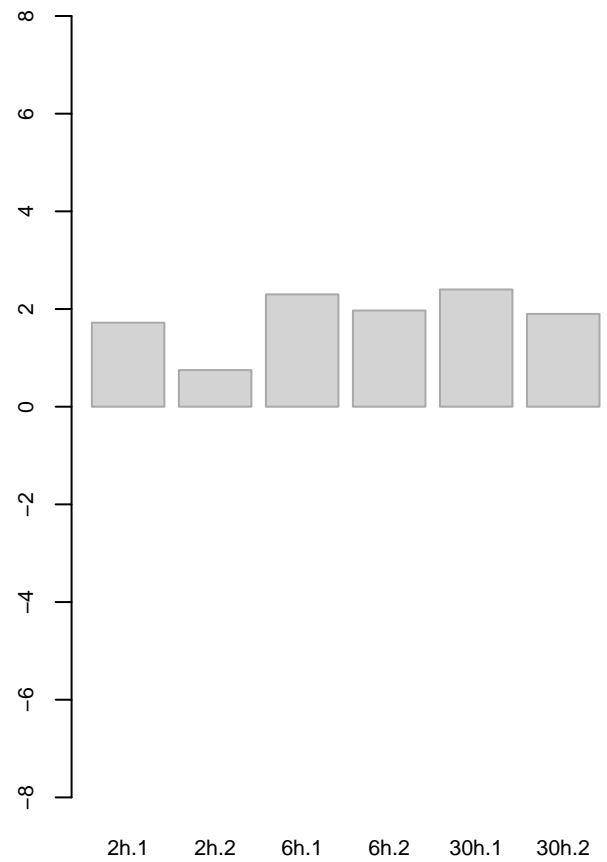

**AT3G49530**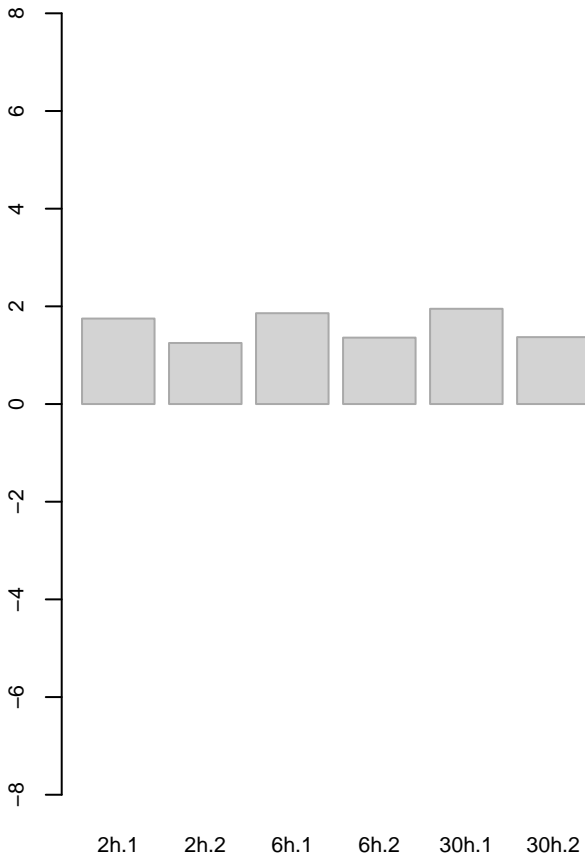**AT3G49960**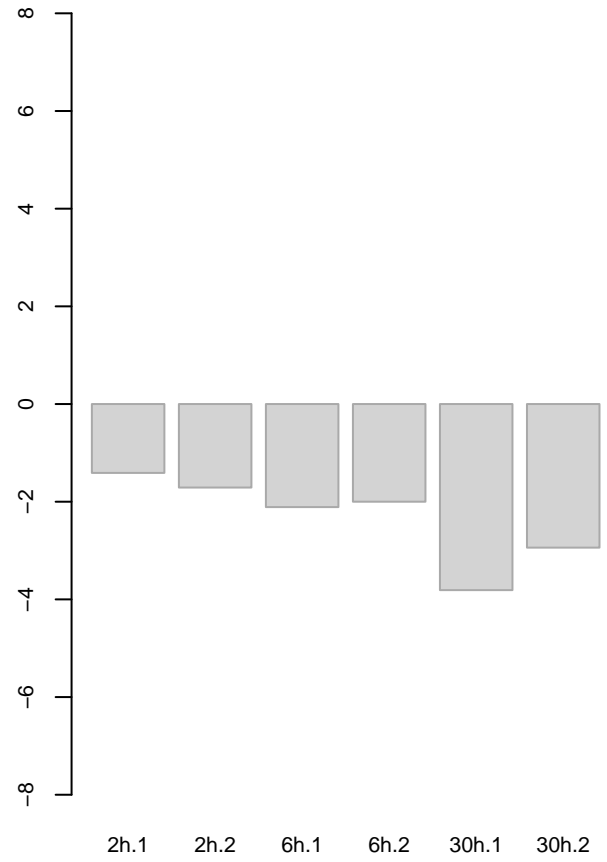**AT3G50930**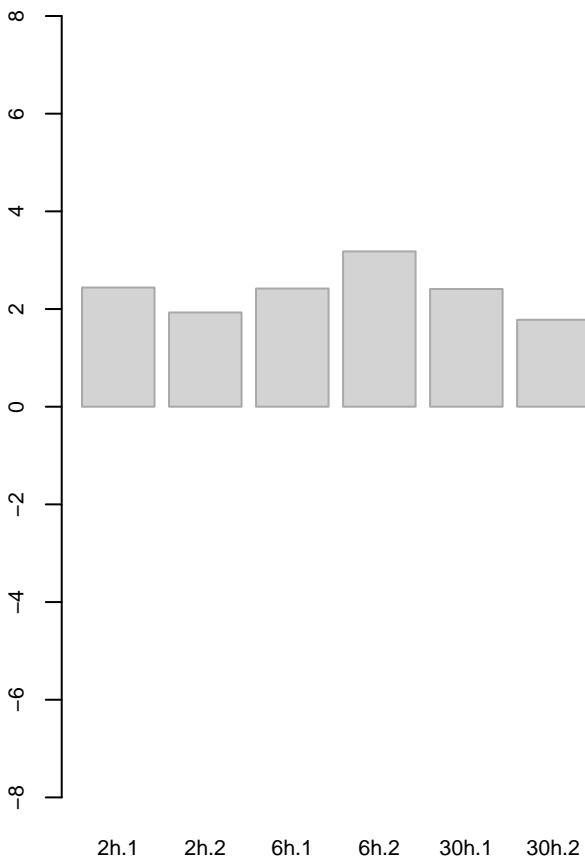**AT3G54420**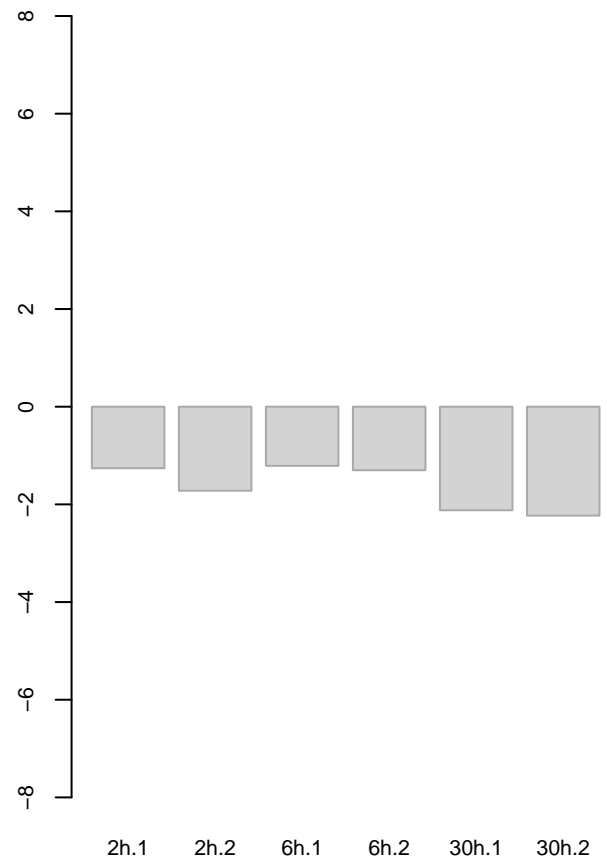

**AT3G54580**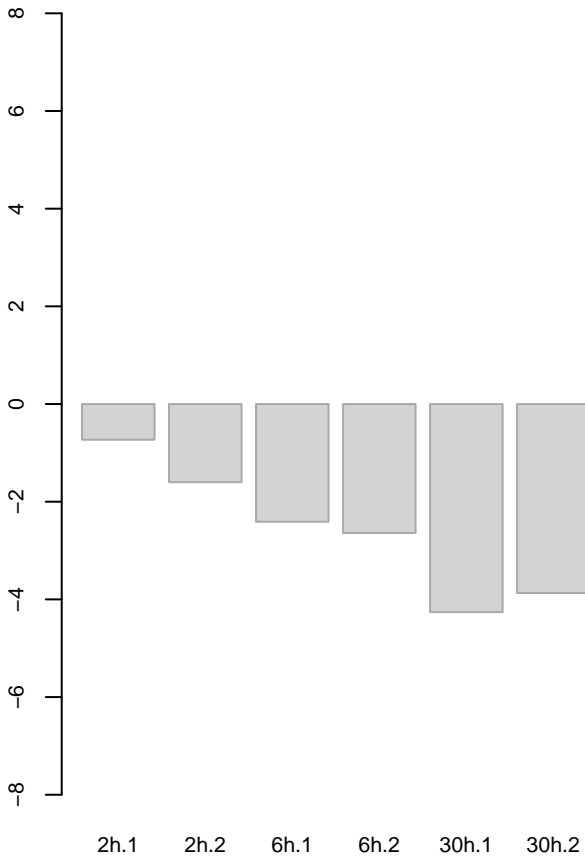**AT3G56400**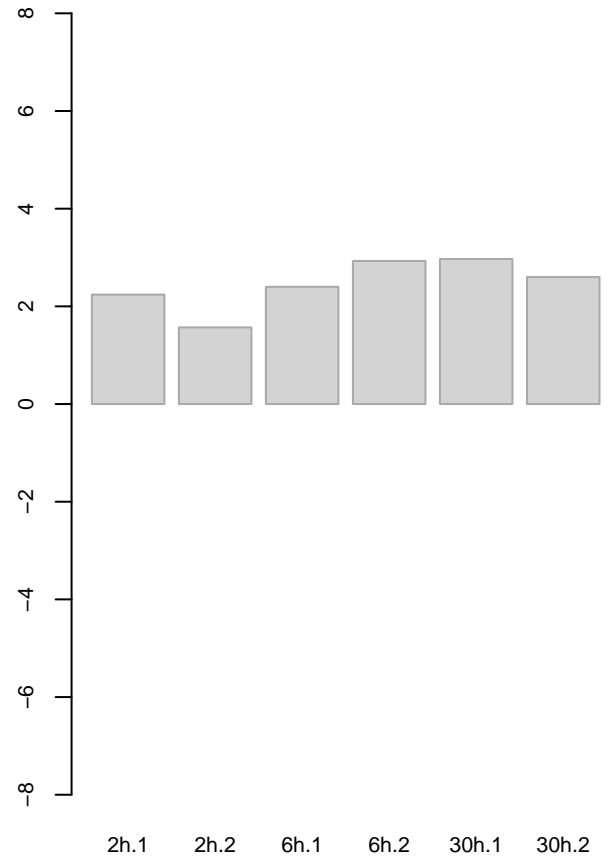**AT3G57880**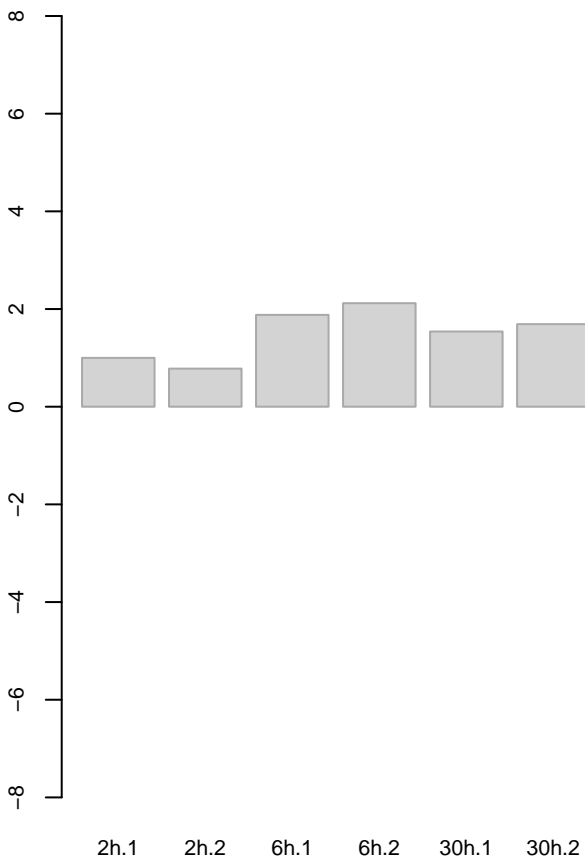**AT3G60130**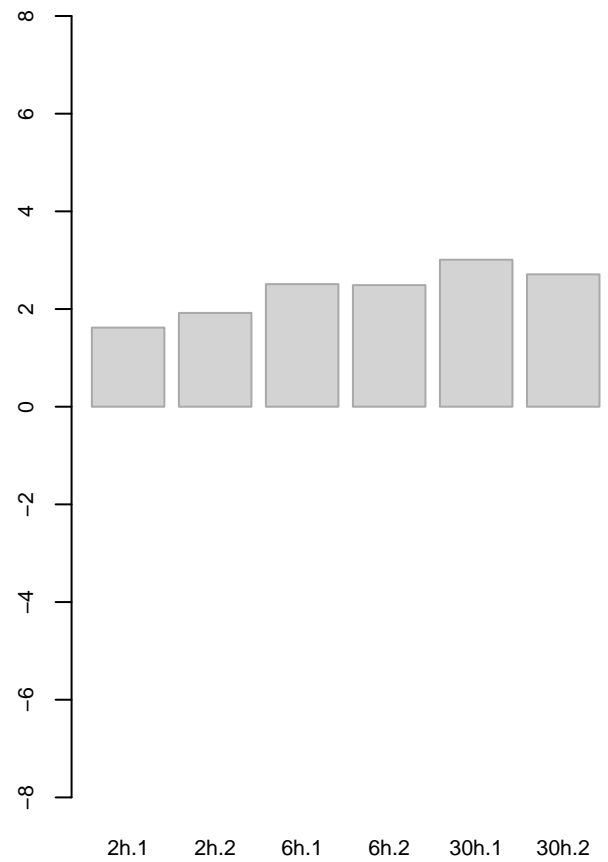

**AT3G60420**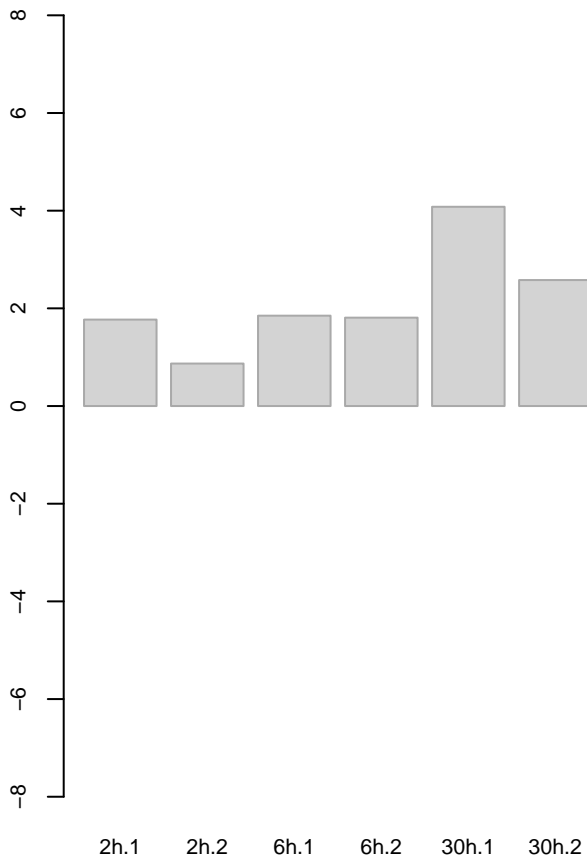**AT3G62260**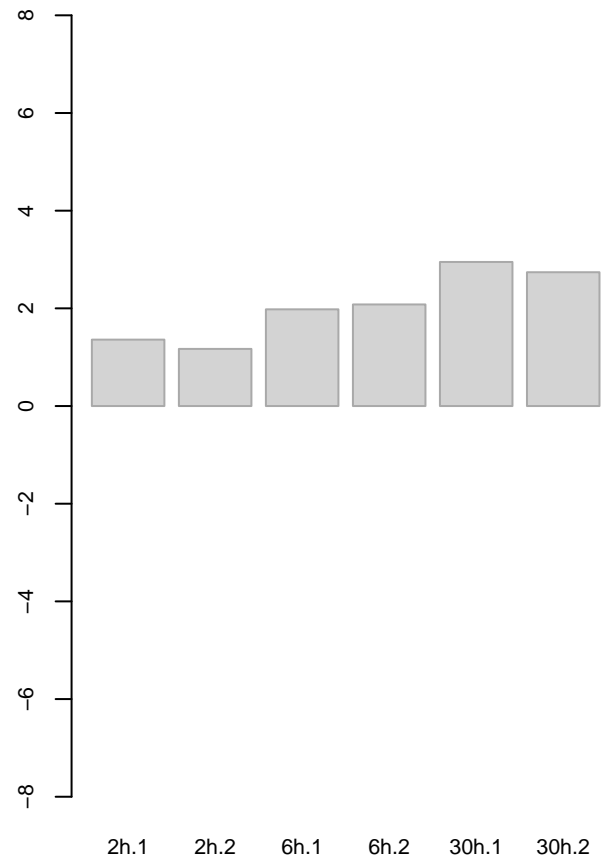**AT4G02270**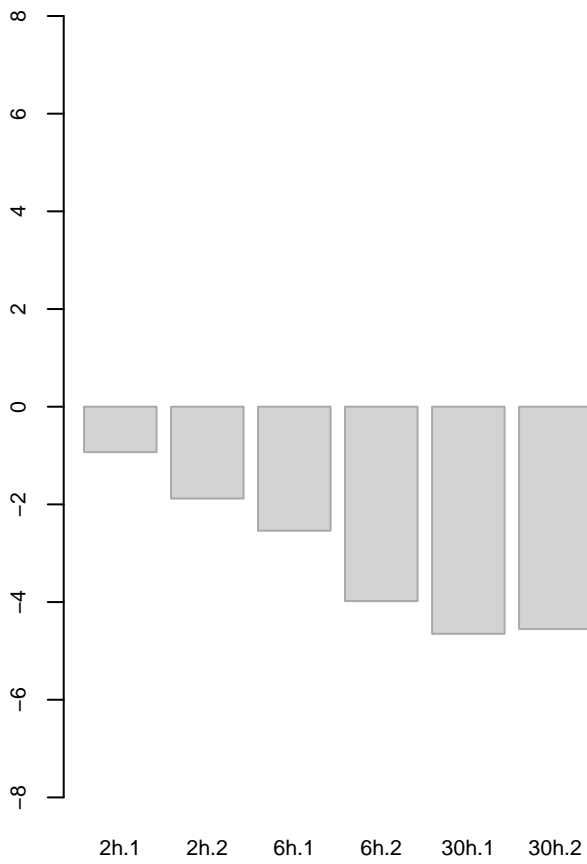**AT4G04610**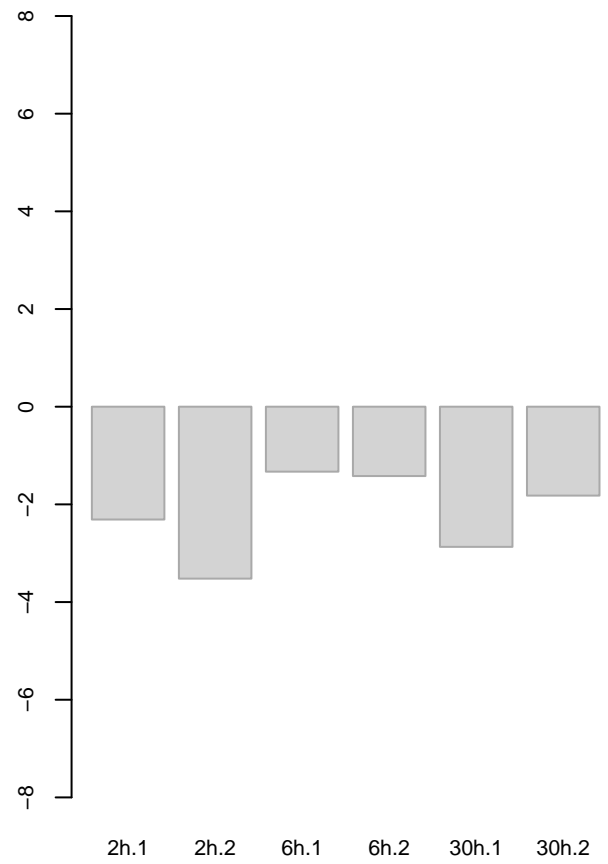

**AT4G12120**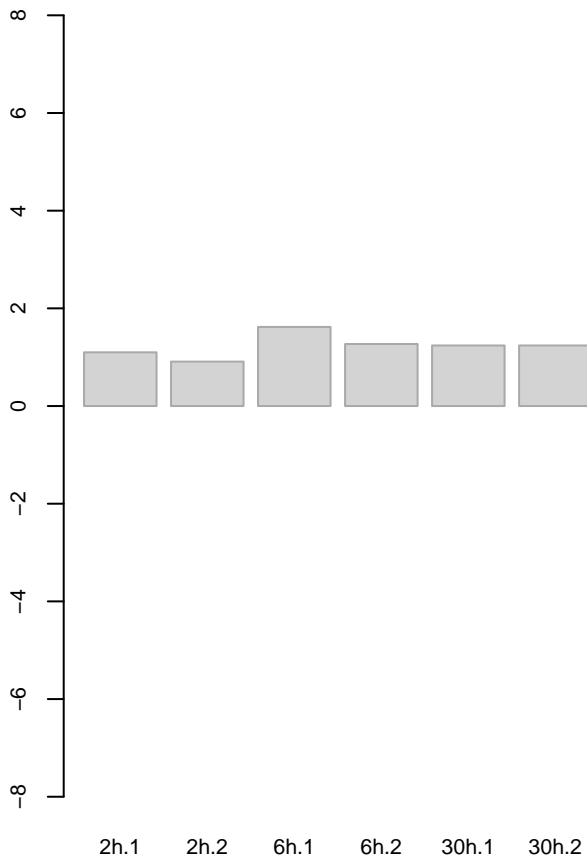**AT4G19690**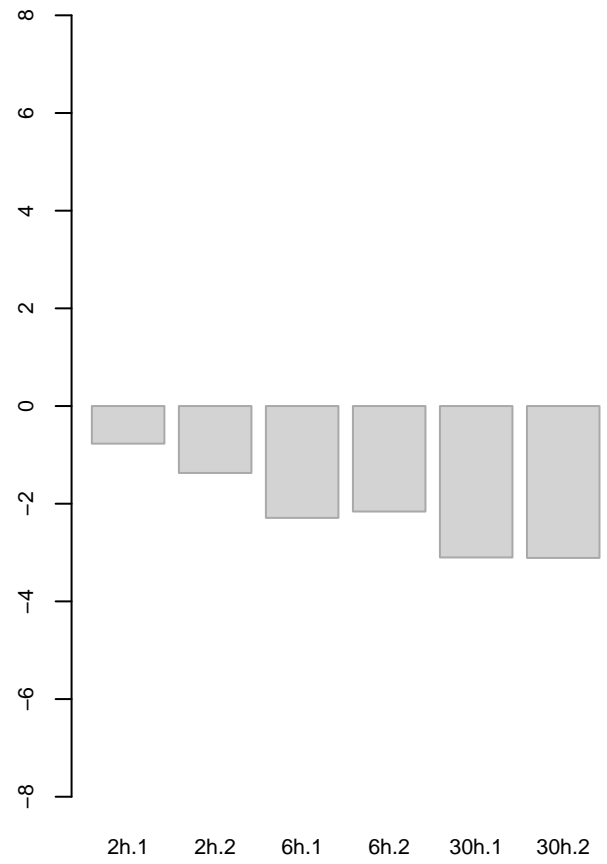**AT4G22010**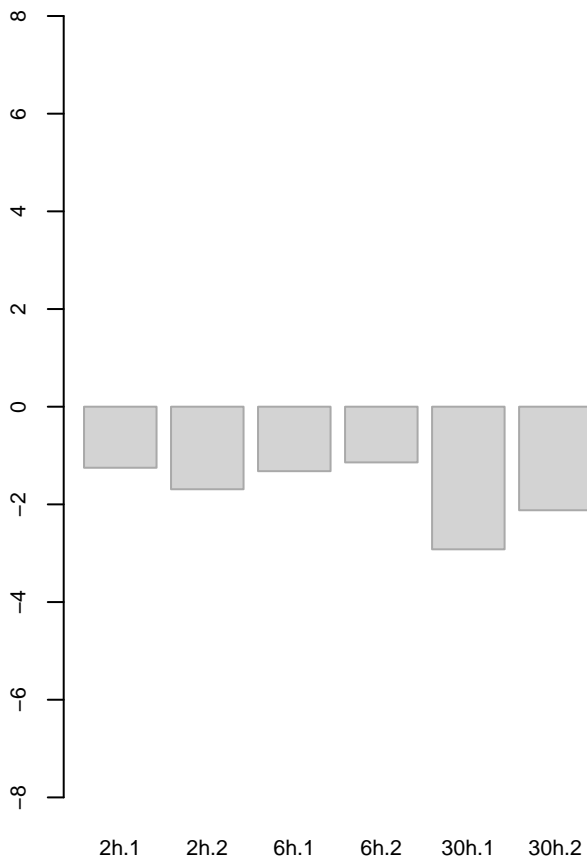**AT4G25670**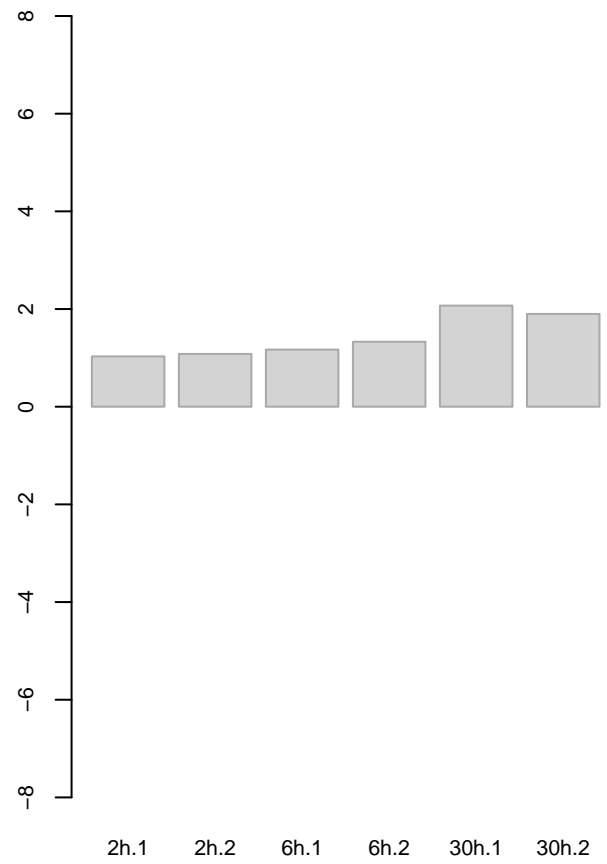

**AT4G26010**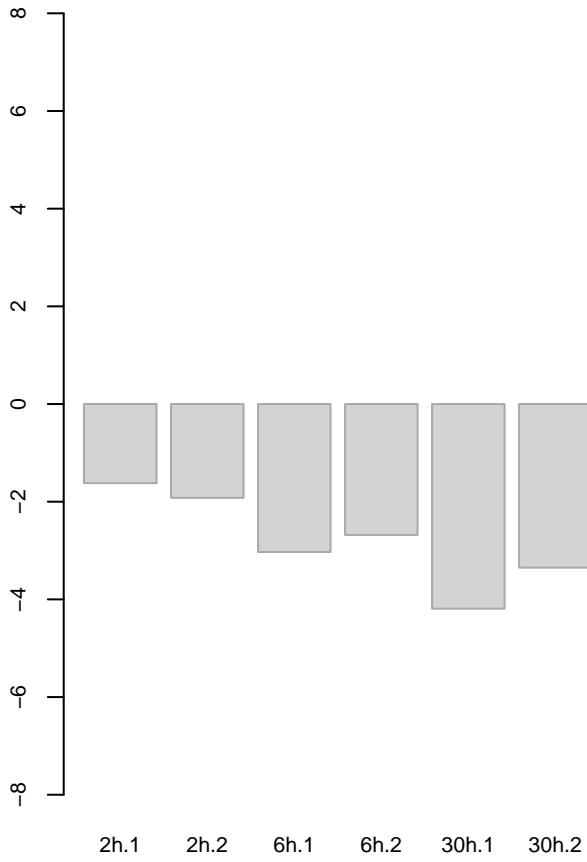**AT4G34710**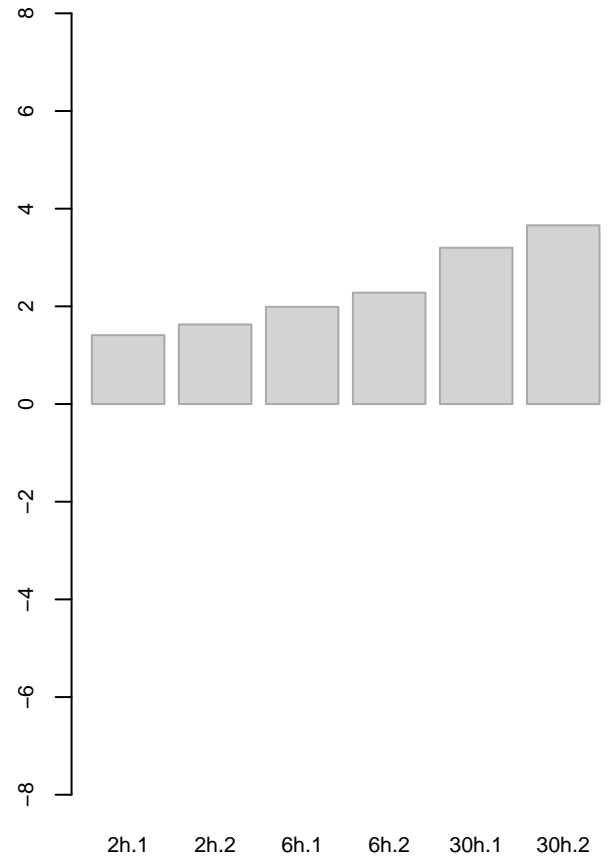**AT4G36950**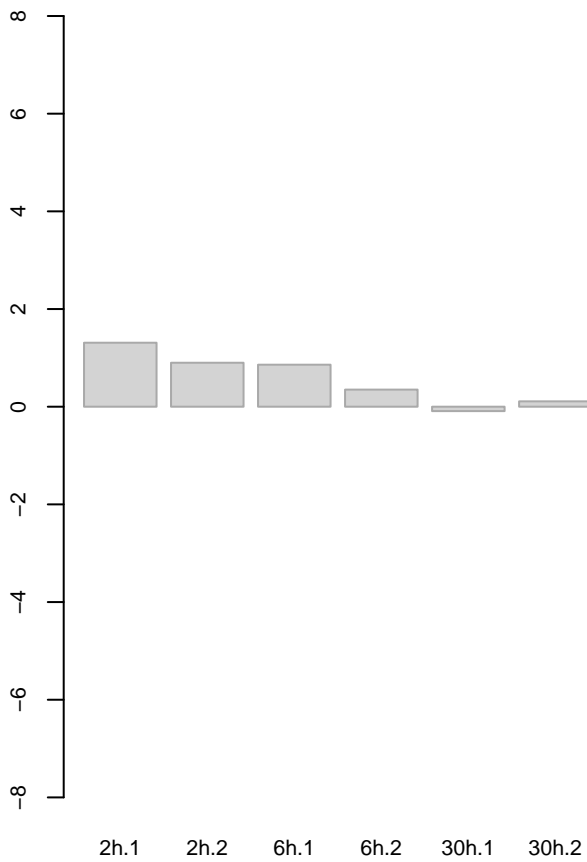**AT4G36950**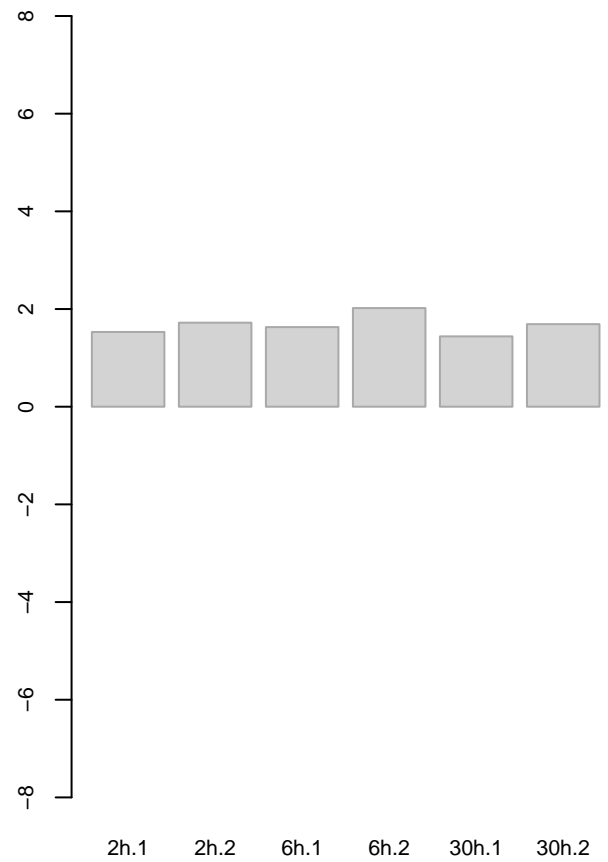

**AT4G37390**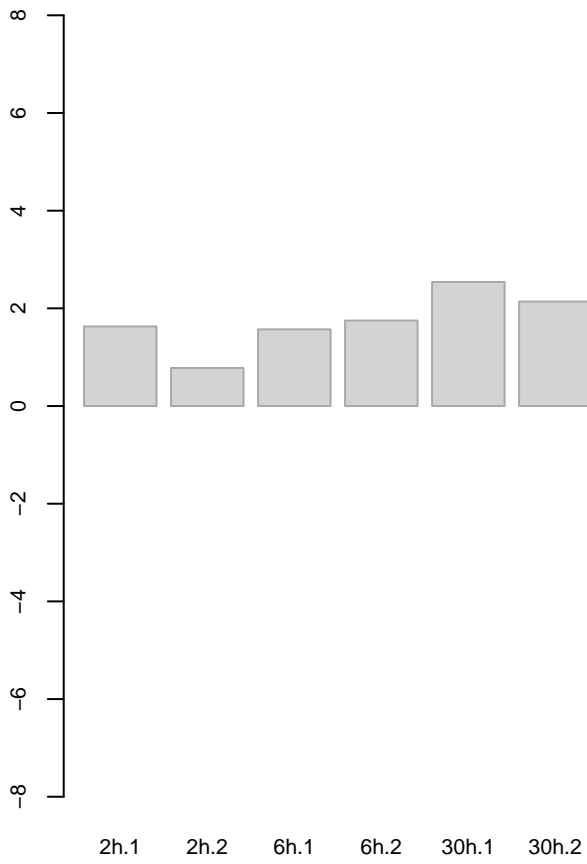**AT4G37520**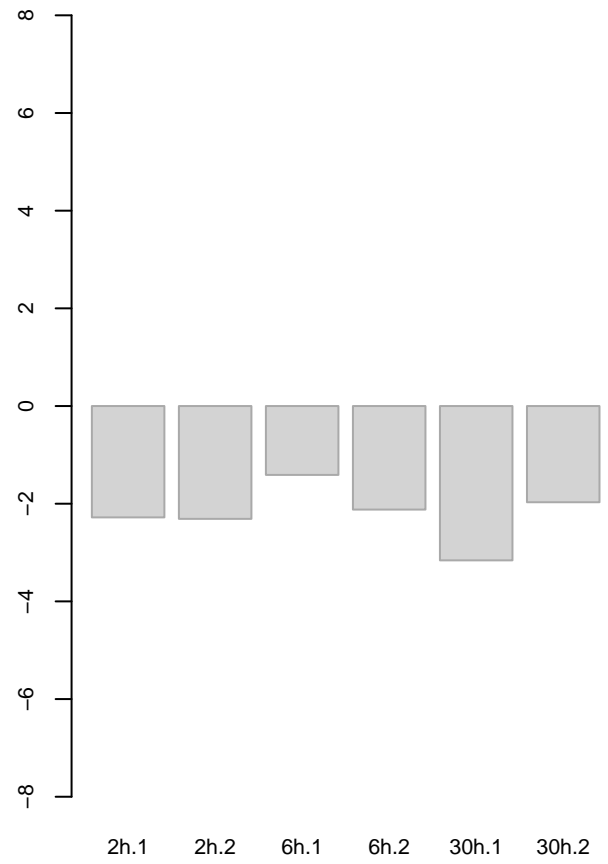**AT5G05340**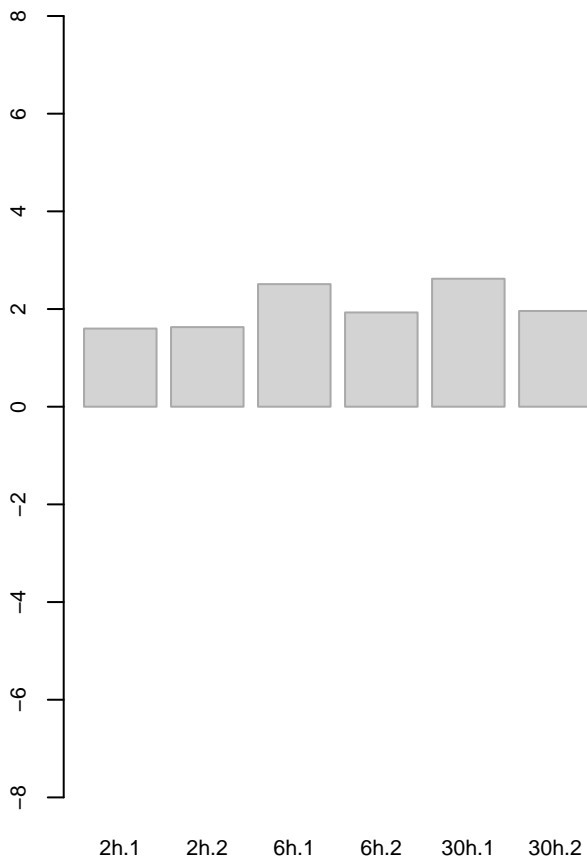**AT5G05440**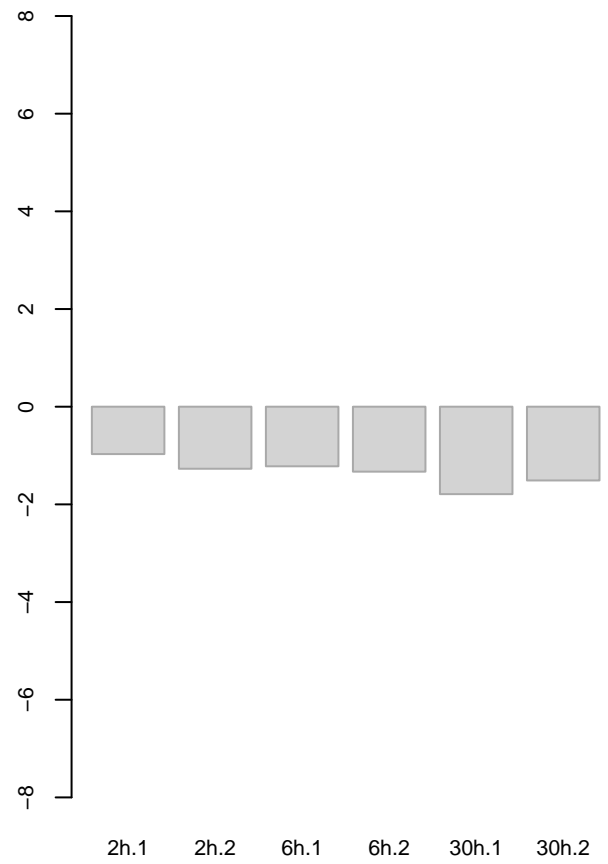

**AT5G05500**

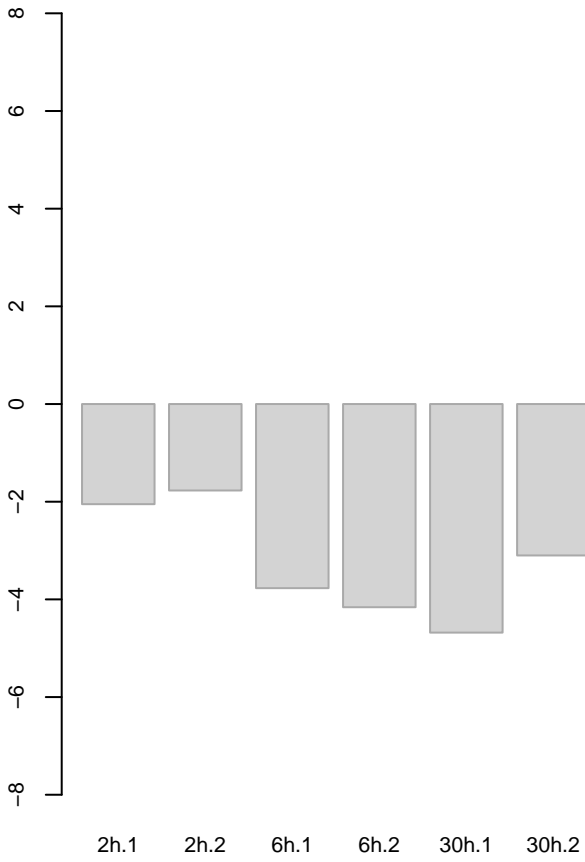

**AT5G06320**

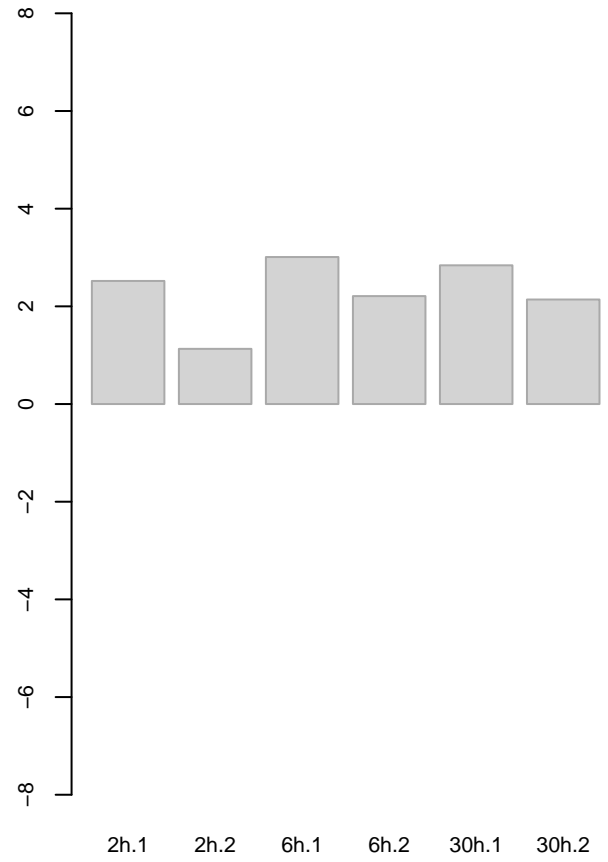

**AT5G10130**

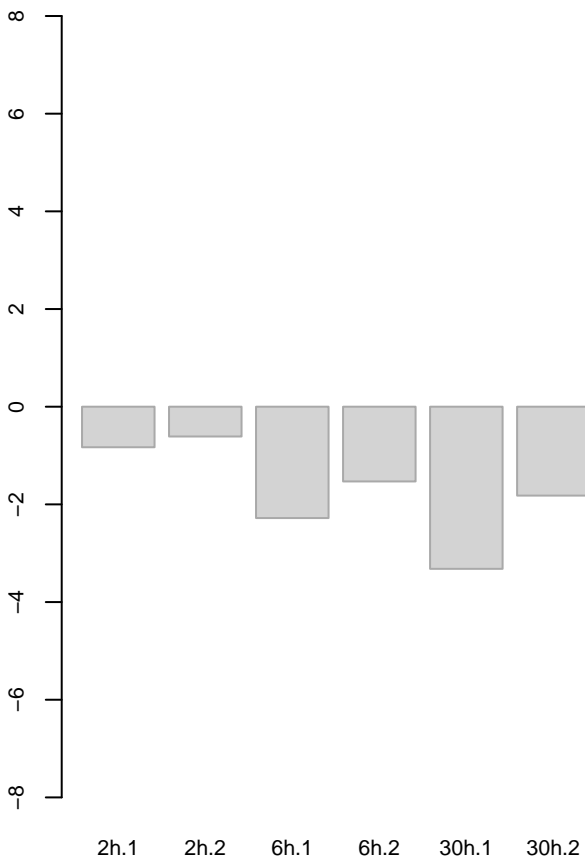

**AT5G15890**

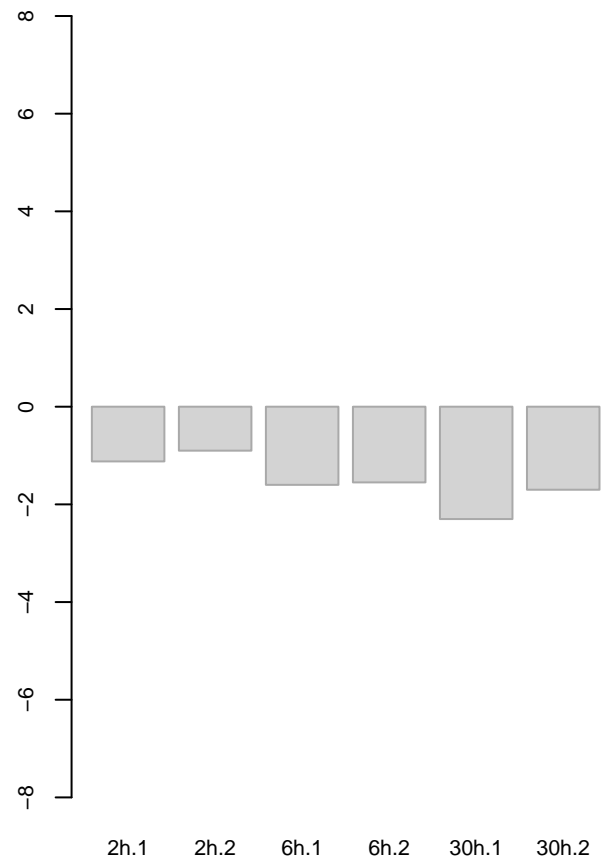



**AT5G18270**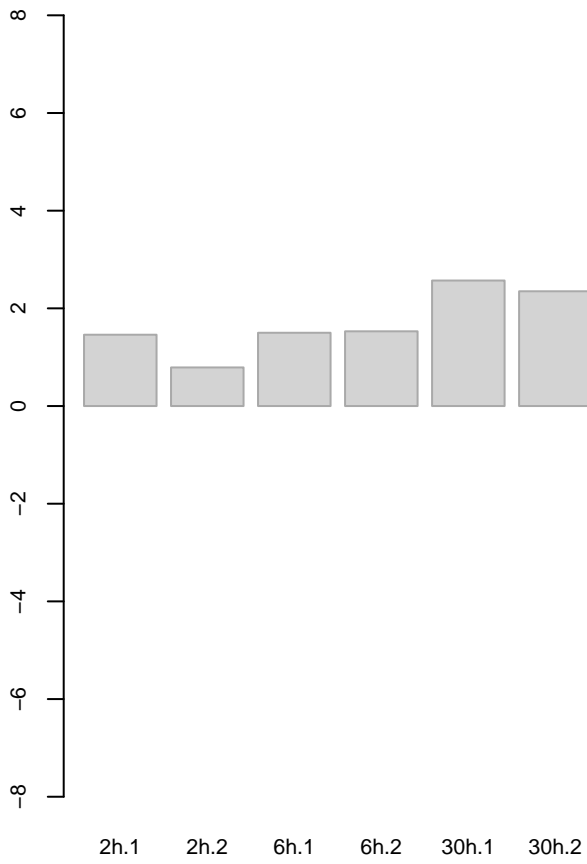**AT5G20230**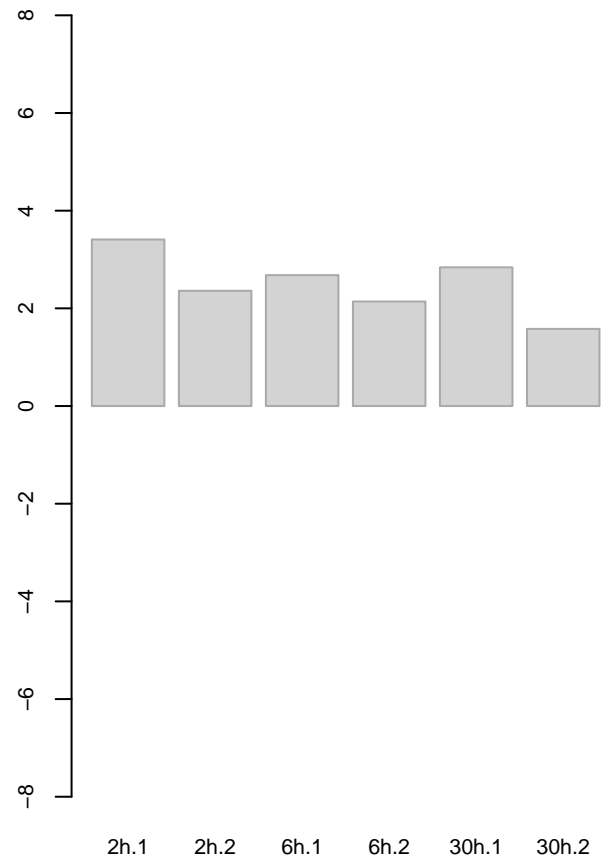**AT5G26340**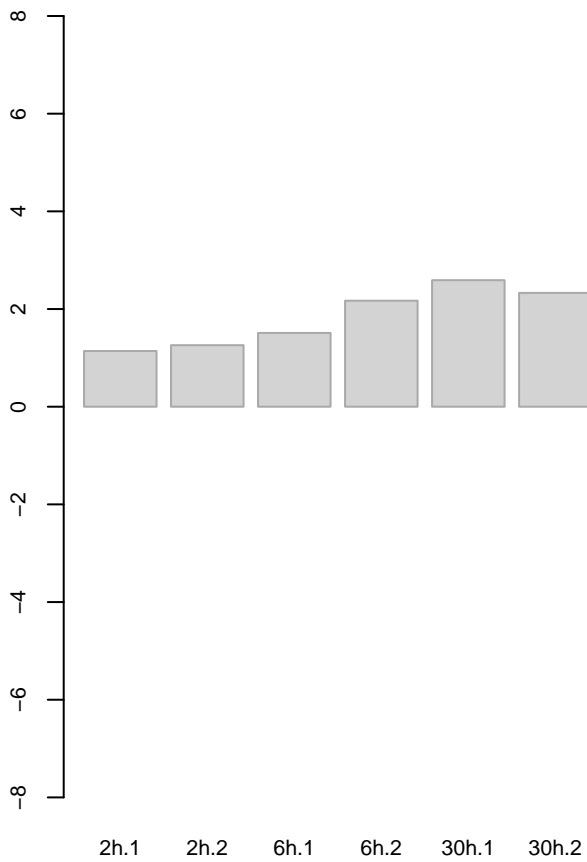**AT5G39670**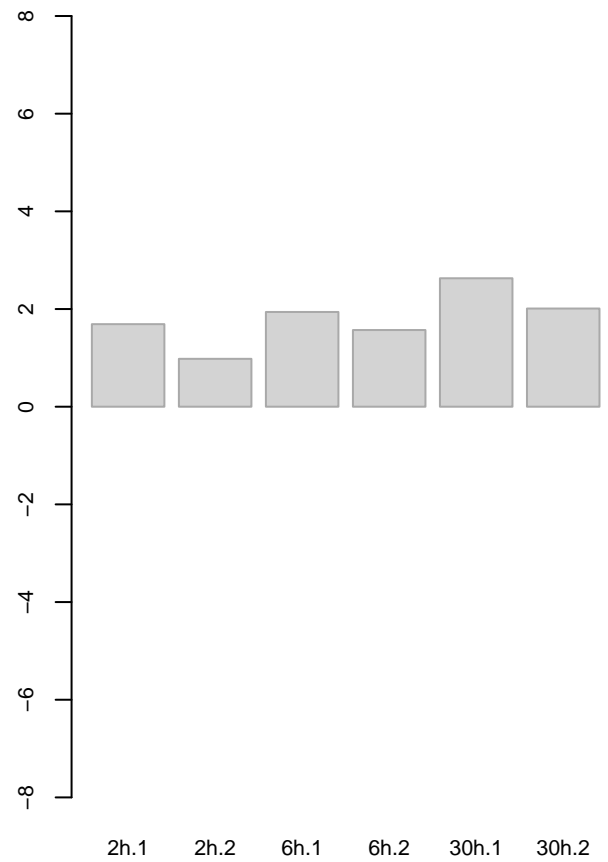

**AT5G40590**

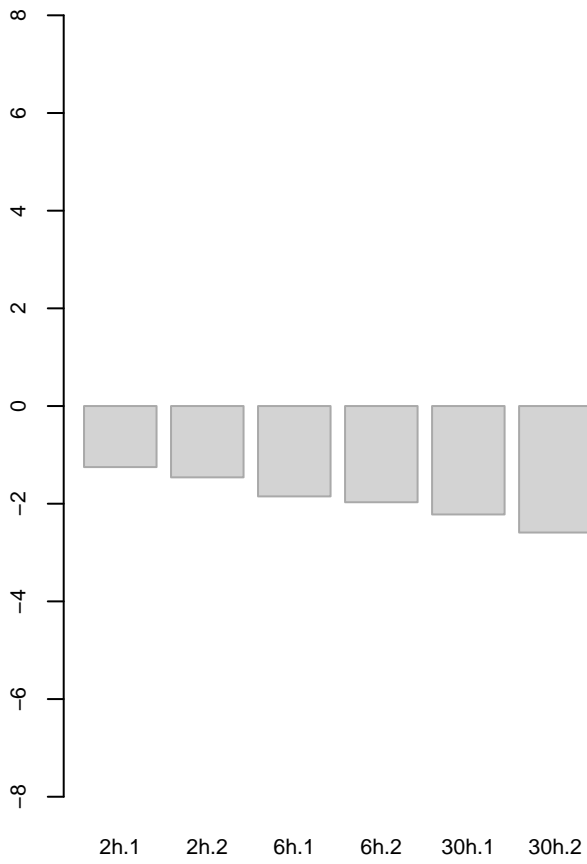

**AT5G42010**

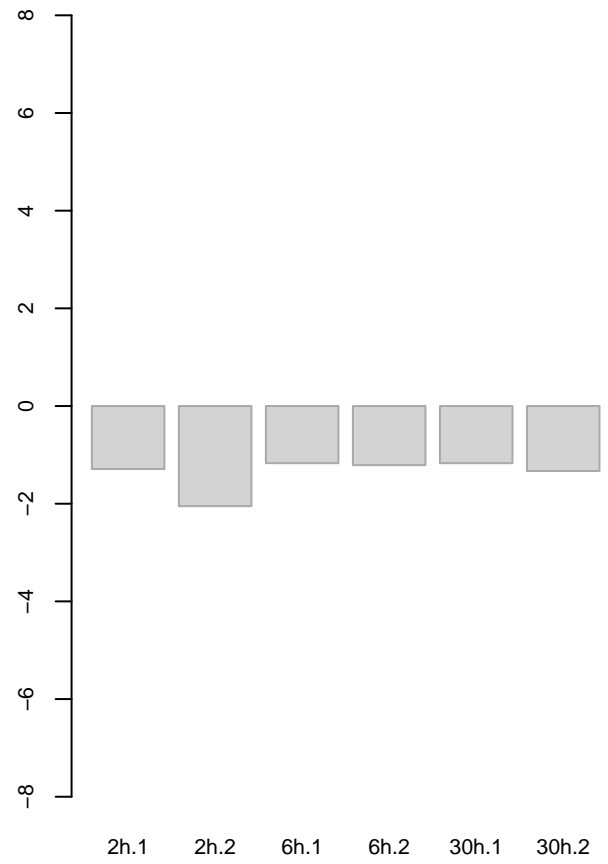

**AT5G42785**

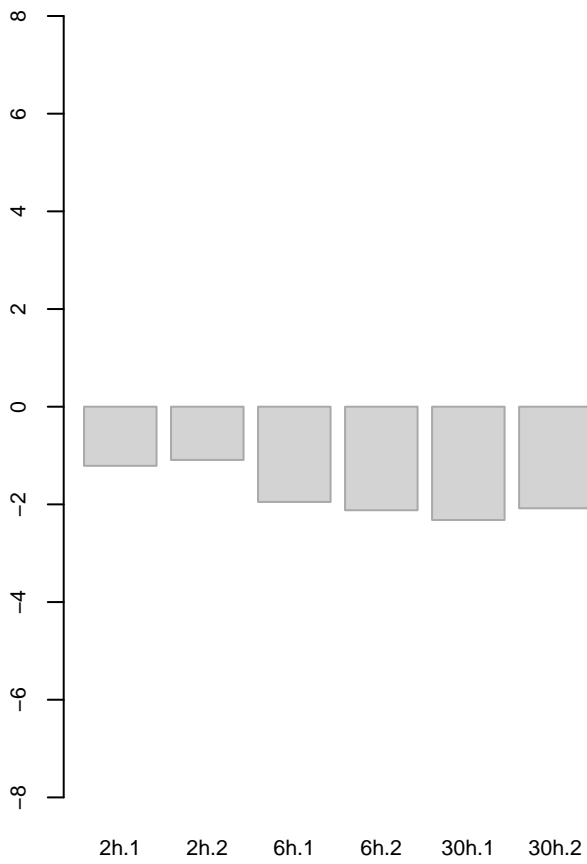

**AT5G45080**

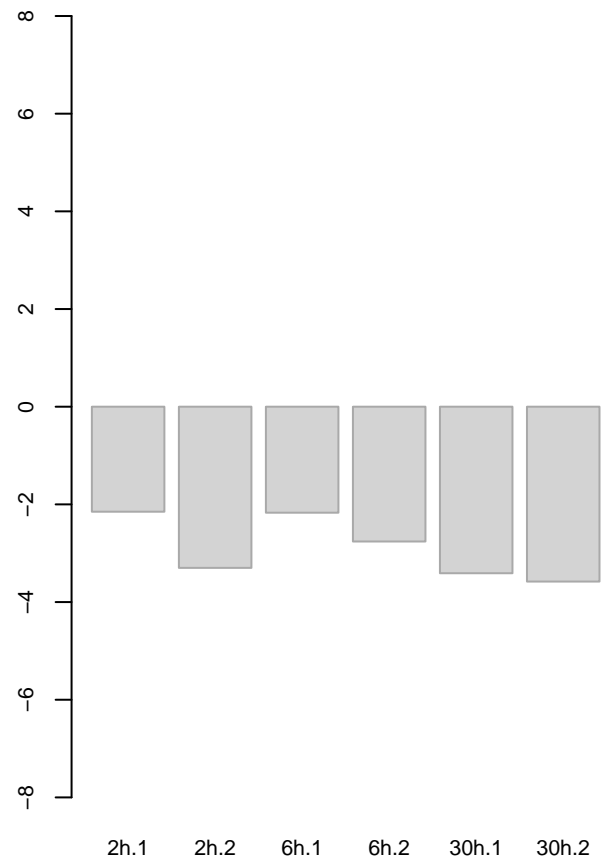

**AT5G45090**

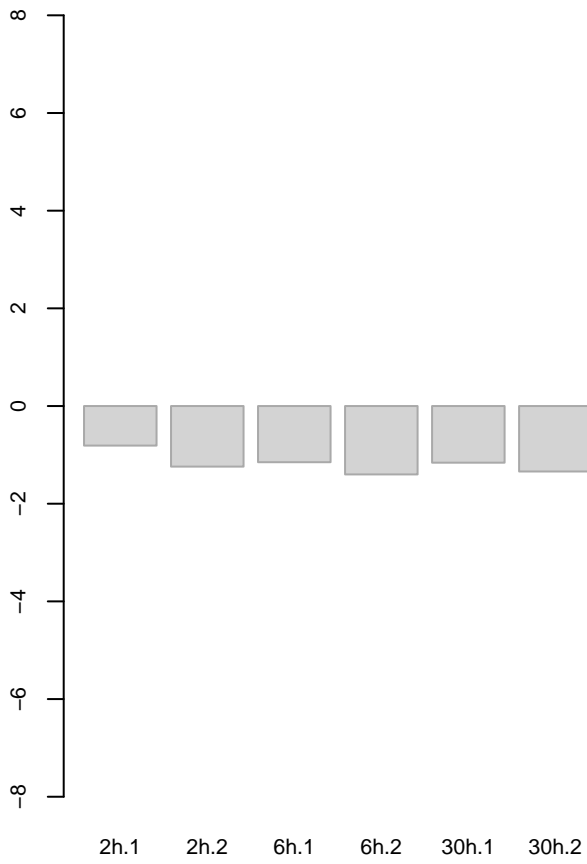

**AT5G45110**

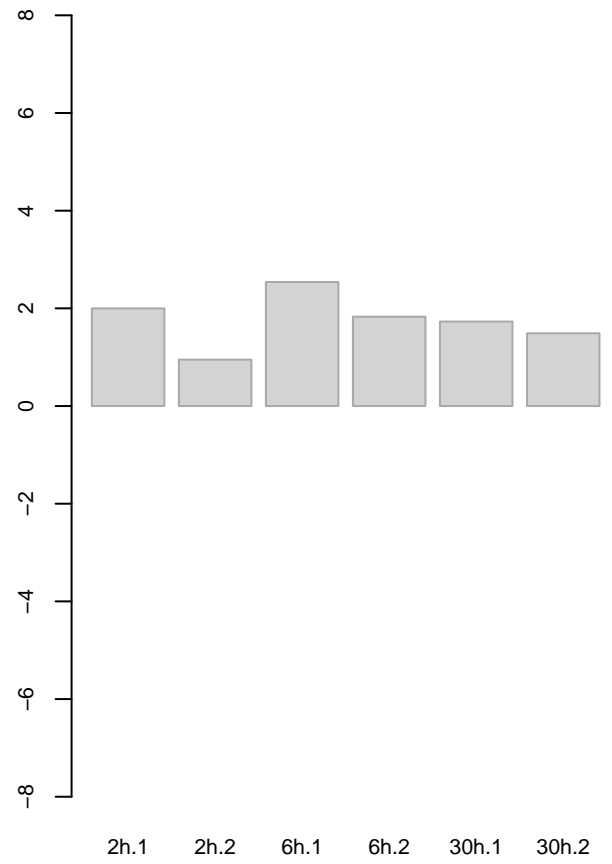

**AT5G45380**

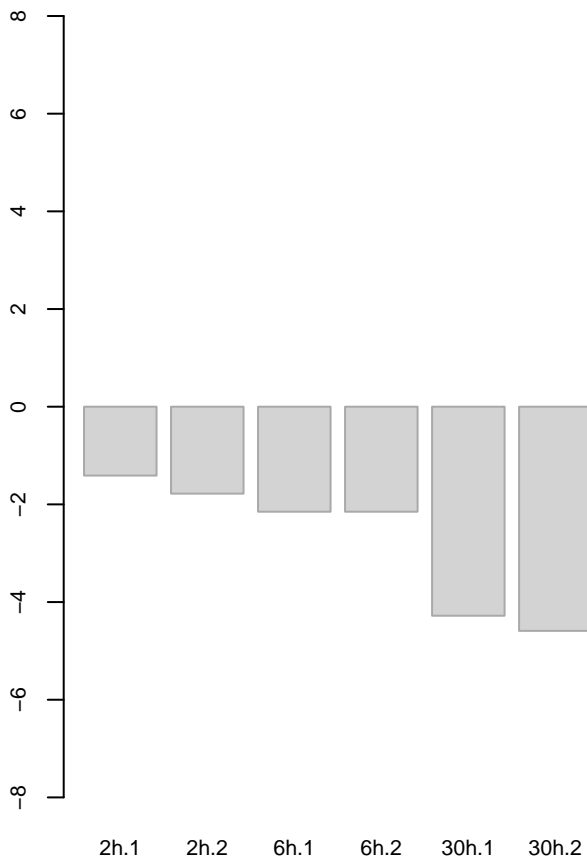

**AT5G45480**

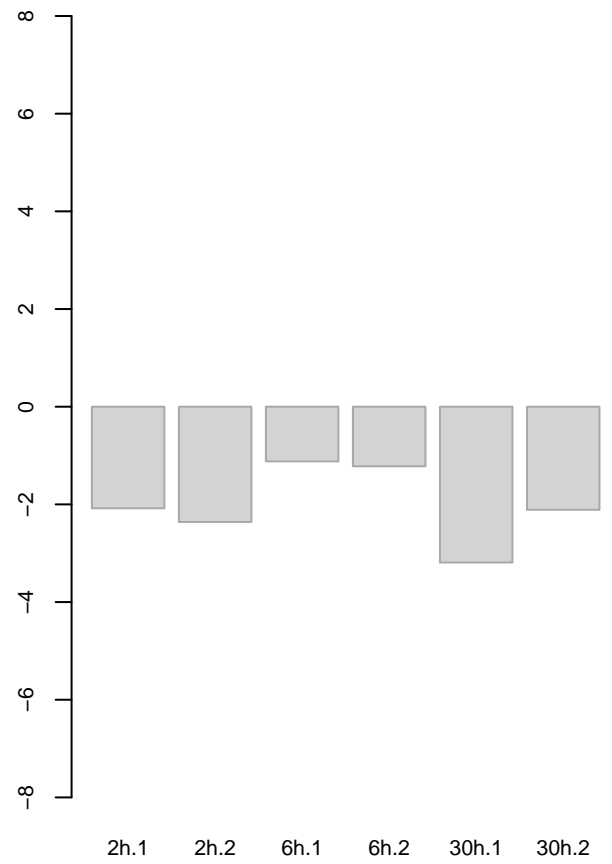

**AT5G48180**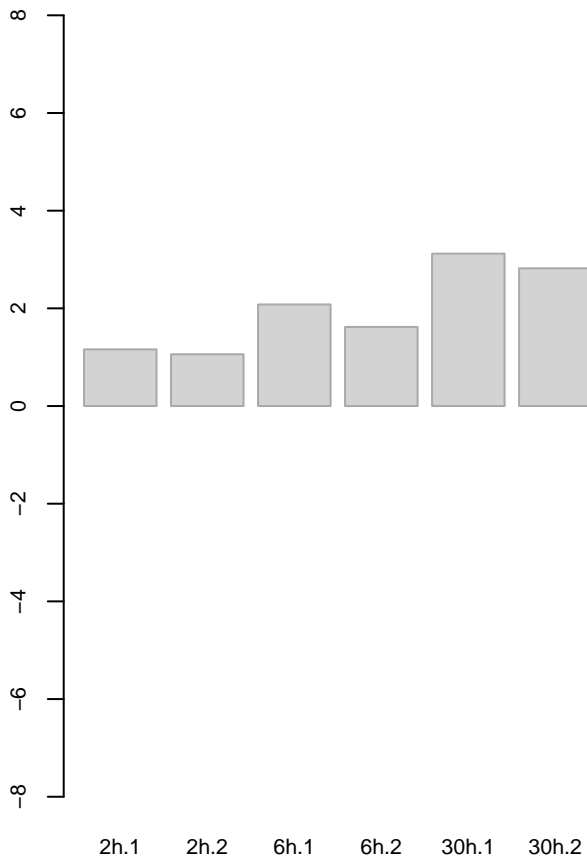**AT5G48430**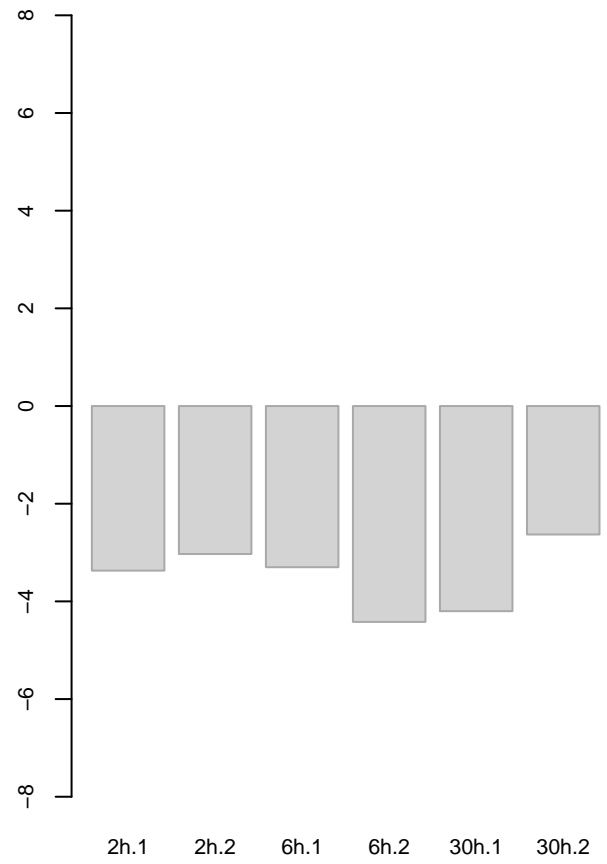**AT5G49520**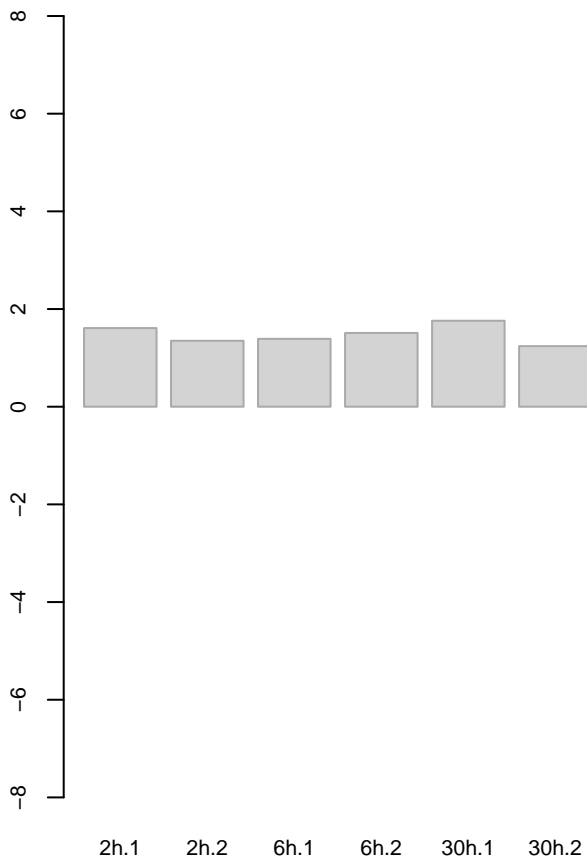**AT5G54370**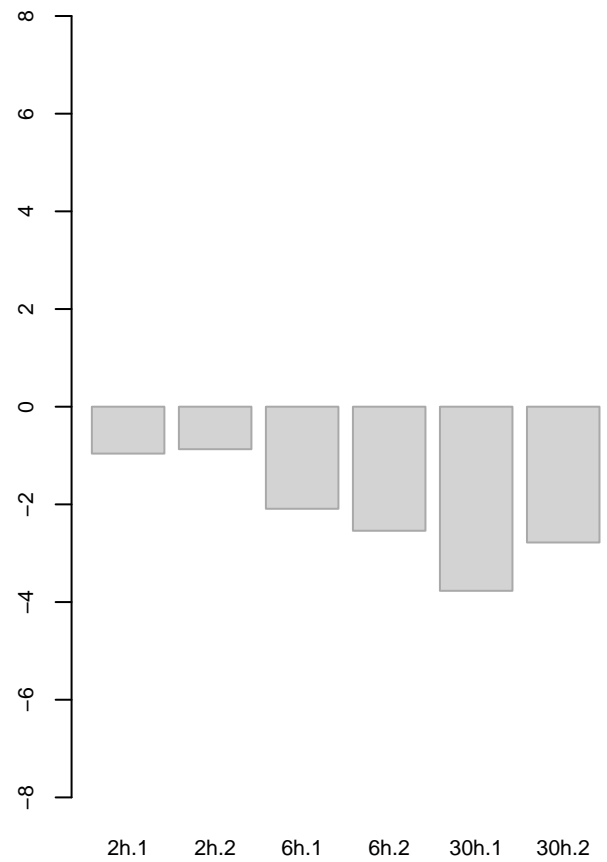

**AT5G56320**

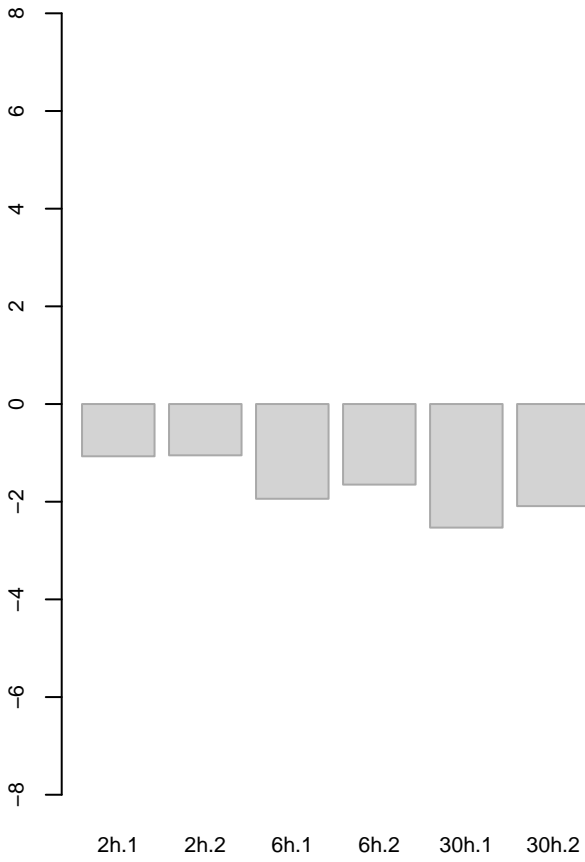

**AT5G57510**

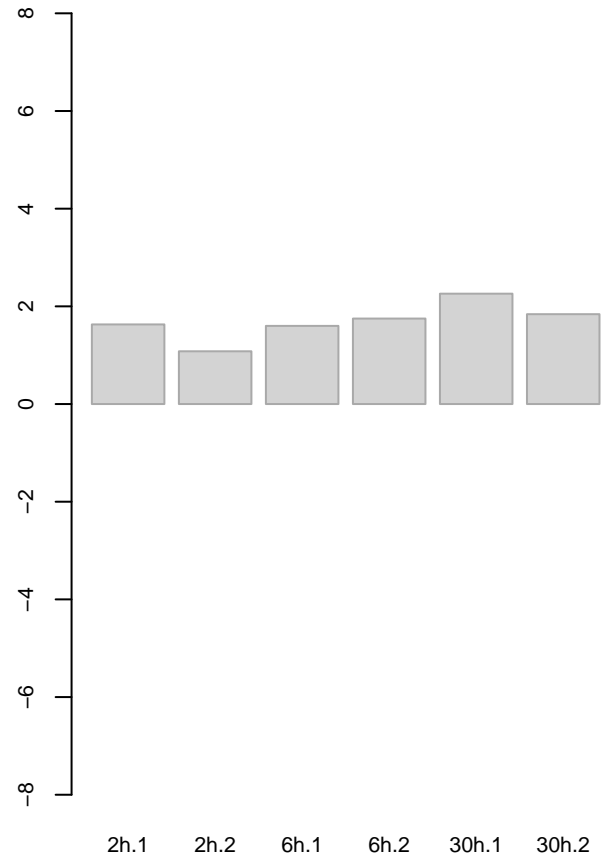

**AT5G57625**

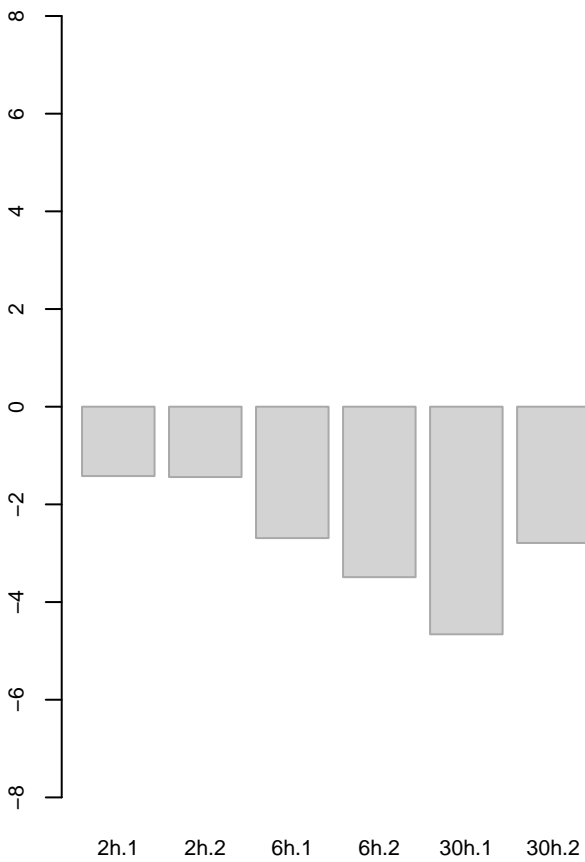

**AT5G58750**

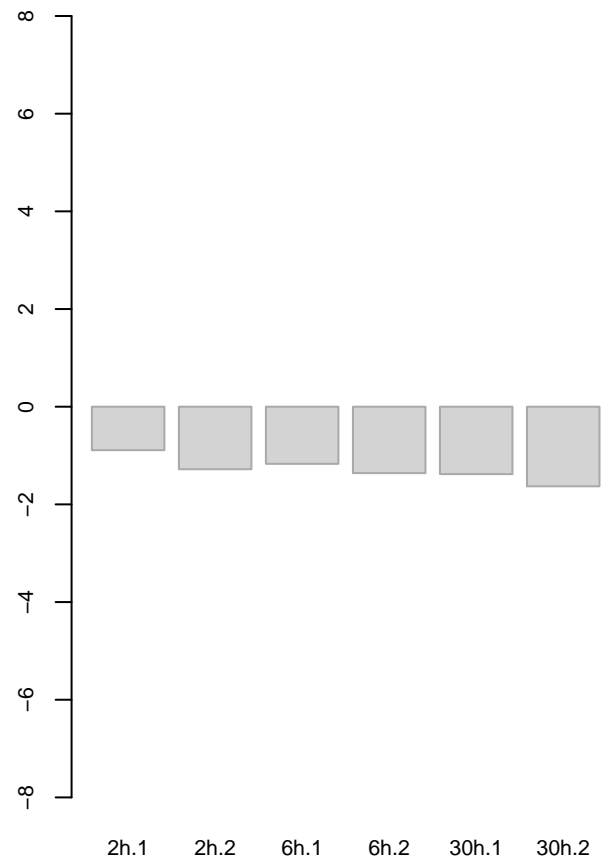

**AT5G64100**

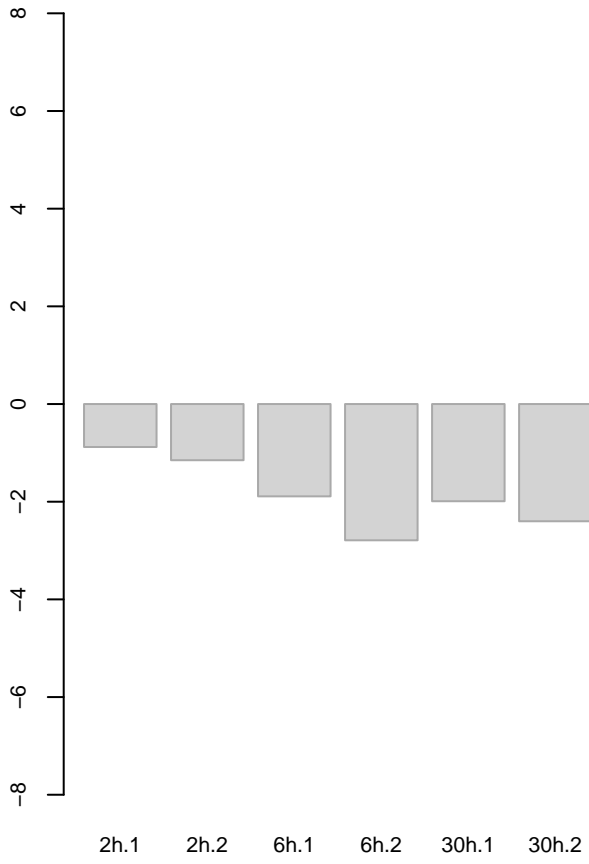

**AT5G64810**

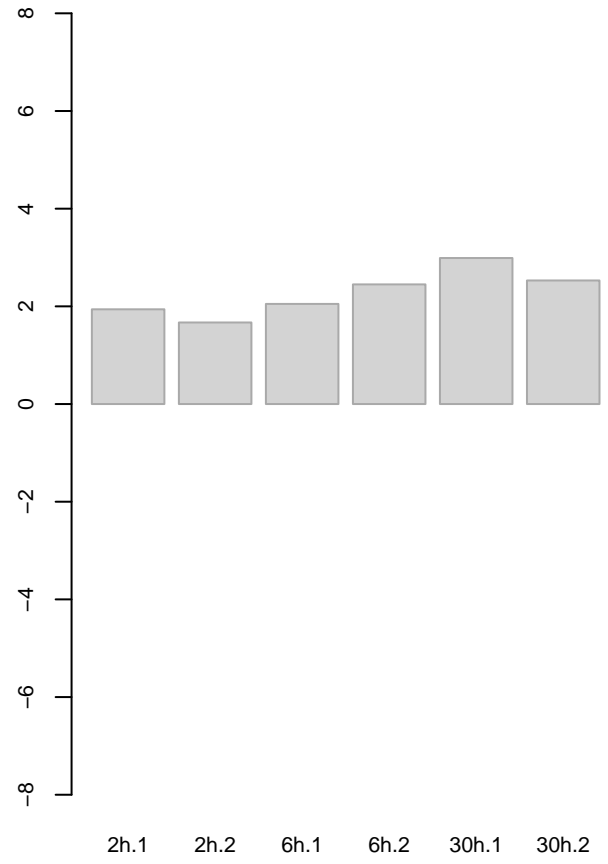

Supplement: c4mt00005f3.pdf [file c4mt00005f3.pdf]
