# Supplementary material for: Uranium perturbs signaling and iron uptake response in Arabidopsis thaliana roots
Source: Royal Society of Chemistry journal article supplement (doi:10.1039/c4mt00005f), 2014-01-01
Supplement: c4mt00005f4.pdf [file c4mt00005f4.pdf]

### Supplemental Table S1 List of primers used in this study

| Gene name (AGI N°)          | Sequence 5' → 3' Forward   | Sequence 5' → 3' Reverse        |
|-----------------------------|----------------------------|---------------------------------|
| <b>Act7 ( AT5G09810)</b>    | ACATCGTTCTCAGTGGTGGTTC     | ACCTGACTCATCGTACTCACTC          |
| <b>AHA2 (AT4G30190)</b>     | AGAGGCTCAATGGGCACTTGCT     | TGGGAGTTTCAATGTCCAAGCCCT        |
| <b>AHA7 (AT3G60330)</b>     | TTGTGCTTGGAGCTTACTTGGCGA   | TCAACGCTTGGCTGATCGTGCT          |
| <b>AtDUR3 (AT5G45380)</b>   | TGGTCGACGACGAGGGAGATCAA    | TGCCACAATTGCCCAAACCAGAA         |
| <b>AtNRT2.5 (AT1G12940)</b> | ACCGCT CCCGCCGTCTATTT      | ATGGGCATGATCAGCTGCGTCG          |
| <b>CCH (AT3G56240)</b>      | TGCGTTGGTGCCGTCAATAGAGT    | ATCAGCCTCGGCTTTTGGCTCA          |
| <b>FIT1 (AT2G28160)</b>     | AAGCTCTCCTTCTCCGGACACA     | TGCAGAACCGGATTTGACTCACGT        |
| <b>FRO2 (AT1G01580)</b>     | TCGTGCAACGCACCAATCTGC      | ACGCAATCACCAGCTGAAACTGAT        |
| <b>IRT1 (AT4G19690)</b>     | AGTCAGCGAACCCGTGCGTC       | CCAAGGATGATCCCGGAGGCCGA         |
| <b>MATE (AT1G33110)</b>     | CCGTTCTCTCTGGAGTTGCCGTC    | GCATTCCGATCCATACGCCTTTTAC       |
| <b>NRAMP1 (AT1G80830)</b>   | GTCAACCCAATGGCGATTACAGCT   | GCAATGCCTGCGAACCCAAGAA          |
| <b>PAP17 (AT3G17790)</b>    | TGCTCCAAGTCTTCAGAAACAGTGGT | TTGCGAGATGGAACTGCGCG            |
| <b>UGT73B4 (AT2G15490)</b>  | TGCAGAGAAAGCCGGAAGAGGGA    | AACCAATCTTCATTTTCACCTGTCCC<br>A |
| <b>ZIP3 (AT2G32270)</b>     | TCAGTGATGGAGAAACCGGCCGA    | AGCTTTTGCAGCATCTGGGCTC          |
