# Supplementary material for: Uranium perturbs signaling and iron uptake response in Arabidopsis thaliana roots
Source: Royal Society of Chemistry journal article supplement (doi:10.1039/c4mt00005f), 2014-01-01
Supplement: c4mt00005f5.xlsx [file c4mt00005f5.xlsx]

## Sheet: data.111
catma	At	Gene Model Description	Name	Mean 2h	Mean 6h	Mean 30h	2h.1	2h.2	6h.1	6h.2	30h.1	30h.2
CATMA1A00560	AT1G01580	Encodes the low-iron-inducible ferric chelate reductase responsible for reduction of iron at the root surface. It is likely to be the major Fe(III) chelate reductase in Arabidopsis iron metabolism. Coordinately regulated with IRT1, the major transporter responsible for high-affinity iron uptake from the soil, at both transcriptional and posttranscriptional levels. Steady state mRNA levels are reg…	ferric-chelate reductase, putative	-1.50143	-3.34084	-4.42326	-1.17097	-1.8319	-2.85626	-3.82542	-3.9542	-4.89232
CATMA1A02720	AT1G03870	fasciclin-like arabinogalactan-protein 9 (Fla9)	fasciclin-like arabinogalactan-protein (	-1.11264	-2.72032	-3.65051	-1.32323	-0.902038	-2.50258	-2.93805	-3.81439	-3.48663
CATMA1A04090	AT1G05240	Peroxidase superfamily protein; FUNCTIONS IN: peroxidase activity, heme binding; INVOLVED IN: response to oxidative stress, oxidation reduction; LOCATED IN: plant-type cell wall; CONTAINS InterPro DOMAIN/s: Haem peroxidase (InterPro:IPR010255), Plant peroxidase (InterPro:IPR000823), Peroxidases heam-ligand binding site (InterPro:IPR019793), Peroxidase, active site (InterPro:IPR019794), Haem perox…	peroxidase, putative	-1.46355	-2.80221	-4.26298	-2.15983	-0.767284	-3.05712	-2.54729	-6.4316	-2.09435
CATMA1A04085	AT1G05250	Peroxidase superfamily protein; FUNCTIONS IN: peroxidase activity, heme binding; INVOLVED IN: response to oxidative stress, oxidation reduction; LOCATED IN: endomembrane system; CONTAINS InterPro DOMAIN/s: Haem peroxidase (InterPro:IPR010255), Plant peroxidase (InterPro:IPR000823), Peroxidases heam-ligand binding site (InterPro:IPR019793), Peroxidase, active site (InterPro:IPR019794), Haem peroxi…	peroxidase, putative	-2.03445	-3.274	-4.32801	-2.24963	-1.81927	-2.95629	-3.5917	-5.46321	-3.1928
CATMA1A06800	AT1G07730	Disease resistance-responsive (dirigent-like protein) family protein; FUNCTIONS IN: molecular_function unknown; INVOLVED IN: biological_process unknown; LOCATED IN: endomembrane system; CONTAINS InterPro DOMAIN/s: Plant disease resistance response protein (InterPro:IPR004265)	disease resistance-responsive family pro	-1.18212	-1.46842	-2.20595	-0.836874	-1.52737	-1.44596	-1.49088	-2.29058	-2.12132
CATMA1A06800	AT1G07740	Tetratricopeptide repeat (TPR)-like superfamily protein; FUNCTIONS IN: molecular_function unknown; INVOLVED IN: biological_process unknown; LOCATED IN: mitochondrion; EXPRESSED IN: 10 plant structures; EXPRESSED DURING: 6 growth stages; CONTAINS InterPro DOMAIN/s: Pentatricopeptide repeat (InterPro:IPR002885); BEST Arabidopsis thaliana protein match is: Pentatricopeptide repeat (PPR-like) superfa…	disease resistance-responsive family pro	-1.18212	-1.46842	-2.20595	-0.836874	-1.52737	-1.44596	-1.49088	-2.29058	-2.12132
CATMA1A10500	AT1G11540	Sulfite exporter TauE/SafE family protein; FUNCTIONS IN: molecular_function unknown; INVOLVED IN: biological_process unknown; LOCATED IN: endomembrane system, integral to membrane; EXPRESSED IN: 13 plant structures; EXPRESSED DURING: M germinated pollen stage, 4 anthesis, C globular stage, 4 leaf senescence stage, petal differentiation and expansion stage; CONTAINS InterPro DOMAIN/s: Protein of u…	expressed protein	-2.3097	-2.09592	-2.59785	-2.10169	-2.51771	-1.94575	-2.24609	-2.9285	-2.26721
CATMA1A10550	AT1G11580	methylesterase PCR A (PMEPCRA); FUNCTIONS IN: enzyme inhibitor activity, pectinesterase activity; INVOLVED IN: cell wall modification; LOCATED IN: cell wall, plasma membrane, plant-type cell wall; EXPRESSED IN: 25 plant structures; EXPRESSED DURING: 13 growth stages; CONTAINS InterPro DOMAIN/s: Pectinesterase, active site (InterPro:IPR018040), Pectin lyase fold/virulence factor (InterPro:IPR01105…	pectin methylesterase, putative	-2.2317	-1.36663	-1.82997	-2.01801	-2.4454	-1.45862	-1.27465	-2.22604	-1.4339
CATMA1A11132	AT1G12080	Vacuolar calcium-binding protein-related; BEST Arabidopsis thaliana protein match is: Vacuolar calcium-binding protein-related (TAIR:AT1G62480.1); Has 21609 Blast hits to 9169 proteins in 1089 species: Archae - 145; Bacteria - 3596; Metazoa - 6157; Fungi - 1827; Plants - 760; Viruses - 333; Other Eukaryotes - 8791 (source: NCBI BLink).	expressed protein	-1.13665	-1.64329	-2.29691	-1.02215	-1.25114	-1.69005	-1.59652	-2.81267	-1.78115
CATMA1A11550	AT1G12560	Member of Alpha-Expansin Gene Family. Naming convention from the Expansin Working Group (Kende et al, 2004. Plant Mol Bio). Containing a conserved root hair-specific cis-element RHE. Expressed specifically in root hair cell and involved in root hair elongation.	expansin, putative (EXP7)	-0.804002	-2.04915	-2.08643	-0.921438	-0.686566	-1.62	-2.4783	-2.1112	-2.06166
CATMA1A11930	AT1G12940	member of High affinity nitrate transporter family	high-affinity nitrate transporter, putat	-2.52538	-3.23023	-4.62067	-2.39757	-2.65319	-3.29875	-3.16172	-4.83435	-4.40698
CATMA1A12340	AT1G13340	Regulator of Vps4 activity in the MVB pathway protein; CONTAINS InterPro DOMAIN/s: Protein of unknown function DUF292, eukaryotic (InterPro:IPR005061); BEST Arabidopsis thaliana protein match is: Regulator of Vps4 activity in the MVB pathway protein (TAIR:AT1G34220.2); Has 628 Blast hits to 628 proteins in 152 species: Archae - 0; Bacteria - 0; Metazoa - 164; Fungi - 130; Plants - 284; Viruses - …	expressed protein	1.06676	1.96475	2.42084	1.47027	0.66324	1.97658	1.95293	2.58794	2.25375
CATMA1A16465	AT1G17420	LOX3 encode a Lipoxygenase. Lipoxygenases (LOXs) catalyze the oxygenation of fatty acids (FAs).	lipoxygenase, putative	1.84659	1.6835	1.38301	1.95137	1.7418	1.57315	1.79385	1.51965	1.24637
CATMA1A22610	AT1G23720	Proline-rich extensin-like family protein; FUNCTIONS IN: structural constituent of cell wall; INVOLVED IN: plant-type cell wall organization; EXPRESSED IN: hypocotyl, root, carpel; EXPRESSED DURING: petal differentiation and expansion stage; CONTAINS InterPro DOMAIN/s: Extensin-like repeat (InterPro:IPR006706); BEST Arabidopsis thaliana protein match is: Proline-rich extensin-like family protein …	proline-rich extensin-like family protei	-1.30016	-2.93749	-3.57069	-0.953807	-1.64652	-2.6252	-3.24977	-3.33569	-3.8057
CATMA1A24060	AT1G25400	unknown protein; BEST Arabidopsis thaliana protein match is: unknown protein (TAIR:AT1G68440.1); Has 21 Blast hits to 21 proteins in 6 species: Archae - 0; Bacteria - 0; Metazoa - 0; Fungi - 0; Plants - 21; Viruses - 0; Other Eukaryotes - 0 (source: NCBI BLink).	expressed protein	1.50755	1.40515	2.43549	1.75505	1.26006	1.47541	1.3349	2.9089	1.96209
CATMA1A25330	AT1G27100	Actin cross-linking protein; FUNCTIONS IN: molecular_function unknown; INVOLVED IN: biological_process unknown; LOCATED IN: vacuole; EXPRESSED IN: 23 plant structures; EXPRESSED DURING: 13 growth stages; CONTAINS InterPro DOMAIN/s: Protein of unknown function DUF569 (InterPro:IPR007679), Actin cross-linking (InterPro:IPR008999); BEST Arabidopsis thaliana protein match is: Protein of unknown funct…	expressed protein	-0.358913	0.118214	0.0559756	-0.358913	NA	0.345853	-0.109425	0.000701923	0.111249
CATMA1A25320	AT1G27100	Actin cross-linking protein; FUNCTIONS IN: molecular_function unknown; INVOLVED IN: biological_process unknown; LOCATED IN: vacuole; EXPRESSED IN: 23 plant structures; EXPRESSED DURING: 13 growth stages; CONTAINS InterPro DOMAIN/s: Protein of unknown function DUF569 (InterPro:IPR007679), Actin cross-linking (InterPro:IPR008999); BEST Arabidopsis thaliana protein match is: Protein of unknown funct…	No AGI match	0.902108	1.18085	1.62272	0.92306	0.881156	1.14327	1.21843	1.75979	1.48566
CATMA1A29020	AT1G30870	Peroxidase superfamily protein; FUNCTIONS IN: peroxidase activity, heme binding; INVOLVED IN: oxidation reduction, response to oxidative stress; LOCATED IN: endomembrane system; EXPRESSED IN: root; CONTAINS InterPro DOMAIN/s: Haem peroxidase (InterPro:IPR010255), Plant peroxidase (InterPro:IPR000823), Peroxidases heam-ligand binding site (InterPro:IPR019793), Haem peroxidase, plant/fungal/bacteri…	cationic peroxidase, putative	-1.35203	-2.51557	-3.48496	-1.20158	-1.50248	-2.06292	-2.96822	-3.23737	-3.73255
CATMA1A31460	AT1G33110	MATE efflux family protein; FUNCTIONS IN: antiporter activity, drug transmembrane transporter activity, transporter activity; INVOLVED IN: drug transmembrane transport, transmembrane transport; LOCATED IN: membrane; EXPRESSED IN: 22 plant structures; EXPRESSED DURING: 13 growth stages; CONTAINS InterPro DOMAIN/s: Multi antimicrobial extrusion protein MatE (InterPro:IPR002528); BEST Arabidopsis th…	MATE efflux family protein	0.875523	1.67966	2.22965	0.8432	0.907846	1.46862	1.89069	2.07978	2.37951
CATMA1A32130	AT1G33900	P-loop containing nucleoside triphosphate hydrolases superfamily protein; FUNCTIONS IN: GTP binding; INVOLVED IN: response to bacterium; CONTAINS InterPro DOMAIN/s: AIG1 (InterPro:IPR006703); BEST Arabidopsis thaliana protein match is: P-loop containing nucleoside triphosphate hydrolases superfamily protein (TAIR:AT1G33930.1); Has 1258 Blast hits to 1107 proteins in 117 species: Archae - 0; Bacte…	avirulence-responsive protein, putative	-0.986801	-1.87783	-1.8437	-0.959472	-1.01413	-1.90661	-1.84905	-2.36036	-1.32703
CATMA1A43271	AT1G52200	PLAC8 family protein; FUNCTIONS IN: molecular_function unknown; INVOLVED IN: response to oxidative stress; LOCATED IN: plasma membrane; EXPRESSED IN: 10 plant structures; EXPRESSED DURING: 6 growth stages; CONTAINS InterPro DOMAIN/s: Protein of unknown function Cys-rich (InterPro:IPR006461); BEST Arabidopsis thaliana protein match is: PLAC8 family protein (TAIR:AT3G18450.1); Has 632 Blast hits to…	expressed protein	-1.57132	-1.90226	-1.66993	-1.52884	-1.61381	-1.70717	-2.09736	-1.53621	-1.80364
CATMA1A44160	AT1G53130	Encodes GRIM REAPER (GRI), involved in the regulation of cell death induced by extracellular ROS (reactive oxygen species). Secreted into the extracellular space.	stigma-specific Stig1 family protein	-1.09313	-2.01422	-1.90945	-1.27039	-0.915861	-2.05234	-1.9761	-2.21229	-1.60661
CATMA1A48650	AT1G59590	ZCF37 mRNA, complete cds	expressed protein	0.980915	2.35817	2.21354	1.28141	0.680421	2.21572	2.50061	2.36122	2.06587
CATMA1A50390	AT1G61340	Encodes a F-box protein induced by various biotic or abiotic stress.	F-box family protein	1.60857	1.84544	1.61883	2.13607	1.08108	1.7605	1.93037	1.81708	1.42059
CATMA1A59160	AT1G69840	SPFH/Band 7/PHB domain-containing membrane-associated protein family; INVOLVED IN: biological_process unknown; LOCATED IN: plasma membrane, chloroplast, vacuole; EXPRESSED IN: 26 plant structures; EXPRESSED DURING: 15 growth stages; CONTAINS InterPro DOMAIN/s: Band 7 protein (InterPro:IPR001107); BEST Arabidopsis thaliana protein match is: SPFH/Band 7/PHB domain-containing membrane-associated pro…	band 7 family protein	1.6383	1.83356	1.57211	1.85385	1.42274	1.91439	1.75274	1.7537	1.39052
CATMA1A64075	AT1G74710	Encodes a protein with isochorismate synthase activity. Mutants fail to accumulate salicylic acid. Its function may be redundant with that of ICS2 (AT1G18870).	isochorismate synthase 1 (ICS1) / isocho	1.12121	3.51194	4.7123	1.37599	0.866433	3.56819	3.4557	5.00404	4.42056
CATMA1A66550	AT1G77330	similar to 1-aminocyclopropane-1-carboxylate oxidase GI:3386565 from (Sorghum bicolor)	1-aminocyclopropane-1-carboxylate oxidas	-1.95214	-1.41688	-2.36116	-2.01865	-1.88562	-1.34033	-1.49342	-2.97435	-1.74797
CATMA1A67370	AT1G78260	RNA-binding (RRM/RBD/RNP motifs) family protein; FUNCTIONS IN: RNA binding, nucleotide binding, nucleic acid binding; INVOLVED IN: biological_process unknown; LOCATED IN: cellular_component unknown; EXPRESSED IN: 21 plant structures; EXPRESSED DURING: 11 growth stages; CONTAINS InterPro DOMAIN/s: RNA recognition motif, RNP-1 (InterPro:IPR000504), Nucleotide-binding, alpha-beta plait (InterPro:IPR…	RNA recognition motif (RRM)-containing p	-1.01919	-1.79638	-2.69595	-1.15987	-0.878514	-1.52111	-2.07164	-3.23911	-2.15279
CATMA1A69290	AT1G80110	phloem protein 2-B11 (PP2-B11); FUNCTIONS IN: carbohydrate binding; LOCATED IN: nucleus; EXPRESSED IN: 10 plant structures; EXPRESSED DURING: 4 anthesis, F mature embryo stage, petal differentiation and expansion stage, E expanded cotyledon stage, D bilateral stage; CONTAINS InterPro DOMAIN/s: F-box domain, cyclin-like (InterPro:IPR001810), F-box domain, Skp2-like (InterPro:IPR022364); BEST Arabi…	expressed protein	1.19844	2.79487	3.76186	1.18552	1.21135	2.84548	2.74426	3.47823	4.04549
CATMA1A69790	AT1G80590	member of WRKY Transcription Factor; Group III	WRKY family transcription factor	1.54114	2.5963	2.91042	1.76413	1.31816	2.47616	2.71644	3.11526	2.70558
CATMA2A02430	AT2G03505	Carbohydrate-binding X8 domain superfamily protein; FUNCTIONS IN: molecular_function unknown; INVOLVED IN: biological_process unknown; LOCATED IN: endomembrane system; CONTAINS InterPro DOMAIN/s: X8 (InterPro:IPR012946); BEST Arabidopsis thaliana protein match is: Carbohydrate-binding X8 domain superfamily protein (TAIR:AT1G13830.1); Has 30201 Blast hits to 17322 proteins in 780 species: Archae -…	glycosyl hydrolase family protein 17	-0.867711	-1.21193	-1.77465	-0.886319	-0.849102	-1.11647	-1.30739	-1.88796	-1.66133
CATMA2A14420	AT2G15490	UDP-glycosyltransferase 73B4 (UGT73B4); FUNCTIONS IN: quercetin 3-O-glucosyltransferase activity, UDP-glycosyltransferase activity, quercetin 7-O-glucosyltransferase activity, UDP-glucosyltransferase activity, transferase activity, transferring glycosyl groups; INVOLVED IN: response to other organism; LOCATED IN: endomembrane system; EXPRESSED IN: root; CONTAINS InterPro DOMAIN/s: UDP-glucuronosy…	UDP-glucoronosyl/UDP-glucosyl transferas	1.00634	1.39324	1.92465	1.04773	0.964947	1.24015	1.54633	1.74125	2.10805
CATMA2A16860	AT2G18193	P-loop containing nucleoside triphosphate hydrolases superfamily protein; FUNCTIONS IN: nucleoside-triphosphatase activity, ATPase activity, nucleotide binding, ATP binding; LOCATED IN: endomembrane system; EXPRESSED IN: callus; CONTAINS InterPro DOMAIN/s: ATPase, AAA-type, core (InterPro:IPR003959), ATPase, AAA+ type, core (InterPro:IPR003593), ATPase, AAA-type, conserved site (InterPro:IPR00396…	AAA-type ATPase family protein	2.04896	2.70776	2.21667	1.84978	2.24813	2.27272	3.14279	2.2116	2.22174
CATMA2A17350	AT2G18700	Encodes an enzyme putatively involved in trehalose biosynthesis. The protein has a trehalose synthase (TPS)-like domain that may or may not be active as well as a trehalose phosphatase (TPP)-like domain.	glycosyl transferase family 20 protein /	1.04042	1.69194	2.77432	0.77051	1.31032	1.44891	1.93497	2.95364	2.595
CATMA2A18610	AT2G20142	Toll-Interleukin-Resistance (TIR) domain family protein; FUNCTIONS IN: transmembrane receptor activity; INVOLVED IN: signal transduction, innate immune response; LOCATED IN: intrinsic to membrane; EXPRESSED IN: 13 plant structures; EXPRESSED DURING: 9 growth stages; CONTAINS InterPro DOMAIN/s: Toll-Interleukin receptor (InterPro:IPR000157); BEST Arabidopsis thaliana protein match is: Disease resi…	No AGI match	1.43598	1.59431	1.96613	1.46926	1.40271	1.54495	1.64367	2.00395	1.9283
CATMA2A19010	AT2G20515	unknown protein; FUNCTIONS IN: molecular_function unknown; INVOLVED IN: biological_process unknown; LOCATED IN: endomembrane system; EXPRESSED IN: 16 plant structures; EXPRESSED DURING: 7 growth stages; Has 71 Blast hits to 71 proteins in 14 species: Archae - 0; Bacteria - 0; Metazoa - 0; Fungi - 0; Plants - 71; Viruses - 0; Other Eukaryotes - 0 (source: NCBI BLink).	expressed protein	-0.800397	-1.6749	-1.88108	-0.896325	-0.704469	-1.85505	-1.49475	-2.19743	-1.56473
CATMA2A21670	AT2G23170	encodes an IAA-amido synthase that conjugates Asp and other amino acids to auxin in vitro.	auxin-responsive GH3 family protein	1.78386	2.19539	2.04152	1.55232	2.01541	2.01499	2.3758	1.92974	2.15329
CATMA2A24210	AT2G25810	tonoplast intrinsic protein 4;1 (TIP4;1); FUNCTIONS IN: water channel activity; INVOLVED IN: transport, transmembrane transport; LOCATED IN: plant-type vacuole membrane, membrane, central vacuole; EXPRESSED IN: 14 plant structures; EXPRESSED DURING: 4 anthesis, F mature embryo stage, petal differentiation and expansion stage, E expanded cotyledon stage, D bilateral stage; CONTAINS InterPro DOMAIN…	tonoplast intrinsic protein, putative	-1.25517	-2.63818	-2.98958	-1.46813	-1.0422	-2.82616	-2.45019	-3.29829	-2.68087
CATMA2A27080	AT2G28670	esb1 mutants have increased levels of suberin and altered levels of several ions in their leaves.	disease resistance-responsive family pro	-1.51253	-2.00737	-2.43121	-1.285	-1.74006	-1.92473	-2.09001	-2.81565	-2.04676
CATMA2A32530	AT2G34390	aquaporin NIP2.1	expressed protein	-0.0260958	-0.180335	-0.215255	0.0226061	-0.0747977	0.0480602	-0.40873	-0.305847	-0.124663
CATMA2A32540	AT2G34390	aquaporin NIP2.1	major intrinsic family protein / MIP fam	-2.15349	-3.27286	-4.15656	-0.961354	-3.34563	-2.66571	-3.88001	-3.64646	-4.66665
CATMA2A32773	AT2G34650	Encodes a protein serine/threonine kinase that may act as a positive regulator of cellular auxin efflux, as a a binary switch for PIN polarity, and as a negative regulator of auxin signaling. Recessive mutants exhibit similar phenotypes as pin-formed mutants in flowers and inflorescence but distinct phenotypes in cotyledons and leaves. Expressed in the vascular tissue proximal to root and shoot m…	protein kinase PINOID (PID)	1.20516	2.05421	1.53526	1.16501	1.24531	1.85753	2.2509	1.82855	1.24197
CATMA2A34180	AT2G35980	Encodes a protein whose sequence is similar to tobacco hairpin-induced gene (HIN1) and Arabidopsis non-race specific disease resistance gene (NDR1). Expression of this gene is induced by cucumber mosaic virus, spermine and during senescence. The gene product is localized to the chloroplast.	harpin-induced family protein (YLS9) / H	1.78155	1.94242	3.05144	1.69116	1.87193	1.99741	1.88744	2.76086	3.34201
CATMA2A34910	AT2G36690	2-oxoglutarate (2OG) and Fe(II)-dependent oxygenase superfamily protein; FUNCTIONS IN: oxidoreductase activity, acting on paired donors, with incorporation or reduction of molecular oxygen, 2-oxoglutarate as one donor, and incorporation of one atom each of oxygen into both donors, oxidoreductase activity; INVOLVED IN: biosynthetic process; LOCATED IN: cellular_component unknown; EXPRESSED IN: hyp…	oxidoreductase, 2OG-Fe(II) oxygenase fam	-2.08986	-3.1051	-2.17359	-2.313	-1.86673	-3.16215	-3.04804	-1.86967	-2.4775
CATMA2B34910	AT2G36690	2-oxoglutarate (2OG) and Fe(II)-dependent oxygenase superfamily protein; FUNCTIONS IN: oxidoreductase activity, acting on paired donors, with incorporation or reduction of molecular oxygen, 2-oxoglutarate as one donor, and incorporation of one atom each of oxygen into both donors, oxidoreductase activity; INVOLVED IN: biosynthetic process; LOCATED IN: cellular_component unknown; EXPRESSED IN: hyp…	oxidoreductase, 2OG-Fe(II) oxygenase fam	-2.31791	-2.08449	-1.25365	-2.12287	-2.51295	-1.9127	-2.25629	-0.983358	-1.52394
CATMA2A42780	AT2G44370	Cysteine/Histidine-rich C1 domain family protein; CONTAINS InterPro DOMAIN/s: DC1 (InterPro:IPR004146), C1-like (InterPro:IPR011424); BEST Arabidopsis thaliana protein match is: Cysteine/Histidine-rich C1 domain family protein (TAIR:AT2G17740.1); Has 2013 Blast hits to 769 proteins in 36 species: Archae - 0; Bacteria - 0; Metazoa - 13; Fungi - 7; Plants - 1977; Viruses - 0; Other Eukaryotes - 16 …	DC1 domain-containing protein	-0.797601	-1.81085	-2.0725	-0.621878	-0.973325	-1.64879	-1.97292	-1.6815	-2.46351
CATMA2A44770	AT2G46400	member of WRKY Transcription Factor; Group III	WRKY family transcription factor	2.18424	2.89218	2.77823	2.72254	1.64594	2.77557	3.0088	2.90179	2.65467
CATMA2A45105	AT2G46680	encodes a putative transcription factor that contains a homeodomain closely linked to a leucine zipper motif. Transcript is detected in all tissues examined. Is transcriptionally regulated in an ABA-dependent manner and may act in a signal transduction pathway which mediates a drought response.	homeobox-leucine zipper protein 7 (HB-7)	1.76942	2.35032	3.75953	1.62211	1.91674	2.2449	2.45574	3.58342	3.93564
CATMA2A45590	AT2G47140	NAD(P)-binding Rossmann-fold superfamily protein; FUNCTIONS IN: oxidoreductase activity, binding, catalytic activity; INVOLVED IN: oxidation reduction, metabolic process; LOCATED IN: cellular_component unknown; EXPRESSED IN: 6 plant structures; EXPRESSED DURING: 4 anthesis, LP.10 ten leaves visible, petal differentiation and expansion stage, LP.08 eight leaves visible, LP.12 twelve leaves visible…	short-chain dehydrogenase/reductase (SDR	-1.3463	-1.80171	-2.30748	-1.41365	-1.27895	-2.09733	-1.50609	-2.82368	-1.79127
CATMA2A46000	AT2G47540	Pollen Ole e 1 allergen and extensin family protein; FUNCTIONS IN: molecular_function unknown; INVOLVED IN: biological_process unknown; LOCATED IN: endomembrane system; EXPRESSED IN: 6 plant structures; EXPRESSED DURING: petal differentiation and expansion stage; CONTAINS InterPro DOMAIN/s: Pollen Ole e 1 allergen/extensin (InterPro:IPR006041); BEST Arabidopsis thaliana protein match is: root hai…	pollen Ole e 1 allergen and extensin fam	-1.3509	-2.96298	-2.82735	-1.34175	-1.36005	-2.33604	-3.58992	-2.4531	-3.2016
CATMA3A00185	AT3G01190	Peroxidase superfamily protein; FUNCTIONS IN: peroxidase activity, heme binding; INVOLVED IN: response to oxidative stress, oxidation reduction; LOCATED IN: endomembrane system; EXPRESSED IN: hypocotyl, root; CONTAINS InterPro DOMAIN/s: Haem peroxidase (InterPro:IPR010255), Plant peroxidase (InterPro:IPR000823), Peroxidases heam-ligand binding site (InterPro:IPR019793), Haem peroxidase, plant/fun…	peroxidase 27 (PER27) (P27) (PRXR7)	-1.99805	-2.74195	-3.57759	-1.68242	-2.31368	-2.57426	-2.90965	-3.50385	-3.65132
CATMA3A01220	AT3G02240	Encodes a root meristem growth factor (RGF). Belongs to a family of functionally redundant homologous peptides that are secreted, tyrosine-sulfated, and expressed mainly in the stem cell area and the innermost layer of central columella cells. RGFs are required for maintenance of the root stem cell niche and transit amplifying cell proliferation. Members of this family include: At5g60810 (RGF1), …	expressed protein	-1.11078	-1.75574	-1.41533	-1.22139	-1.00017	-1.89511	-1.61638	-1.45142	-1.37923
CATMA3A08130	AT3G09270	Encodes glutathione transferase belonging to the tau class of GSTs. Naming convention according to Wagner et al. (2002).	glutathione S-transferase, putative	1.06008	1.56823	2.17091	1.11921	1.00095	1.66914	1.46732	2.48554	1.85627
CATMA3A10500	AT3G11550	Uncharacterised protein family (UPF0497); CONTAINS InterPro DOMAIN/s: Uncharacterised protein family UPF0497, trans-membrane plant (InterPro:IPR006702), Uncharacterised protein family UPF0497, trans-membrane plant subgroup (InterPro:IPR006459); BEST Arabidopsis thaliana protein match is: Uncharacterised protein family (UPF0497) (TAIR:AT5G06200.1); Has 610 Blast hits to 610 proteins in 22 species:…	integral membrane family protein	-0.955347	-2.61716	-2.45741	-0.883088	-1.02761	-2.68467	-2.54966	-2.85985	-2.05498
CATMA3A10960	AT3G12050	Aha1 domain-containing protein; FUNCTIONS IN: ATPase activator activity, chaperone binding; INVOLVED IN: response to stress; LOCATED IN: cytoplasm; EXPRESSED IN: 24 plant structures; EXPRESSED DURING: 16 growth stages; CONTAINS InterPro DOMAIN/s: Activator of Hsp90 ATPase, N-terminal (InterPro:IPR015310), Activator of Hsp90 ATPase homologue 1-like (InterPro:IPR013538); Has 600 Blast hits to 579 p…	Aha1 domain-containing protein	-0.937319	-2.34389	-2.87843	-1.15521	-0.719429	-2.35805	-2.32973	-3.37232	-2.38453
CATMA3A14910	AT3G15500	Encodes an ATAF-like NAC-domain transcription factor that doesn't contain C-terminal sequences shared by CUC1, CUC2 and NAM. Note: this protein (AtNAC3) is not to be confused with the protein encoded by locus AT3G29035, which, on occasion, has also been referred to as AtNAC3.	no apical meristem (NAM) family protein	1.18985	1.81925	3.33839	0.900805	1.47889	1.55937	2.07912	3.6298	3.04699
CATMA3A17290	AT3G17790	Expression is upregulated in the shoot of cax1/cax3 mutant.	acid phosphatase type 5 (ACP5)	0.767184	1.55738	3.78705	0.754152	0.780217	1.5737	1.54107	4.09969	3.47441
CATMA3A17300	AT3G17790	Expression is upregulated in the shoot of cax1/cax3 mutant.	expressed protein	0.687508	0.605226	1.38545	0.720273	0.654743	0.658375	0.552078	1.65189	1.119
CATMA3A19045	AT3G19450	Encodes a catalytically active cinnamyl alcohol dehydrogenase which uses p-coumaryl aldehyde as a preferred substrate. It can also use caffeyl, coniferyl and d-hydroxyconiferyl aldehydes as substrates.	cinnamyl-alcohol dehydrogenase (CAD)	-0.860767	-1.67314	-2.6096	-0.911575	-0.809958	-1.48688	-1.85939	-2.79971	-2.41949
CATMA3A19600	AT3G19990	unknown protein; INVOLVED IN: biological_process unknown; LOCATED IN: chloroplast stroma, chloroplast; EXPRESSED IN: 23 plant structures; EXPRESSED DURING: 13 growth stages; Has 118 Blast hits to 118 proteins in 41 species: Archae - 0; Bacteria - 42; Metazoa - 0; Fungi - 0; Plants - 56; Viruses - 0; Other Eukaryotes - 20 (source: NCBI BLink).	expressed protein	1.10498	1.43395	1.92459	1.0902	1.11977	1.34081	1.52709	2.35812	1.49107
CATMA3A24400	AT3G24503	Arabidopsis thaliana aldehyde dehydrogenase AtALDH1a mRNA. a sinapaldehyde dehydrogenase catalyzes both the oxidation of coniferylaldehyde and sinapaldehyde forming ferulic acid and sinapic acid, respectively	aldehyde dehydrogenase (ALDH1a)	-0.697211	-0.636943	-2.09139	-0.664475	-0.729948	-0.391216	-0.882671	-2.35673	-1.82605
CATMA3A24410	AT3G24503	Arabidopsis thaliana aldehyde dehydrogenase AtALDH1a mRNA. a sinapaldehyde dehydrogenase catalyzes both the oxidation of coniferylaldehyde and sinapaldehyde forming ferulic acid and sinapic acid, respectively	aldehyde dehydrogenase (ALDH1a)	-2.5672	-1.55958	-3.35052	-2.4938	-2.6406	-1.50415	-1.61502	-4.33797	-2.36307
CATMA3A25700	AT3G25882	encodes a kinase that physically interacts with NPR1/NIM1	NPR1/NIM1-interacting protein 2 (NIMIN-2	1.44814	2.01699	2.83583	1.67187	1.22442	1.69411	2.33987	3.20765	2.46401
CATMA3A28430	AT3G28550	Proline-rich extensin-like family protein; FUNCTIONS IN: structural constituent of cell wall; INVOLVED IN: plant-type cell wall organization; LOCATED IN: endomembrane system; CONTAINS InterPro DOMAIN/s: Extensin-like repeat (InterPro:IPR006706); BEST Arabidopsis thaliana protein match is: Proline-rich extensin-like family protein (TAIR:AT3G54580.1); Has 433536 Blast hits to 44790 proteins in 1795…	No AGI match	-1.28189	-2.355	-3.44869	-1.20543	-1.35835	-2.03073	-2.67928	-3.46165	-3.43573
CATMA3A29610	AT3G29410	Terpenoid cyclases/Protein prenyltransferases superfamily protein; FUNCTIONS IN: lyase activity, magnesium ion binding; INVOLVED IN: metabolic process; EXPRESSED IN: embryo, root, flower, seed; EXPRESSED DURING: F mature embryo stage, petal differentiation and expansion stage, E expanded cotyledon stage, D bilateral stage; CONTAINS InterPro DOMAIN/s: Terpene synthase, metal-binding domain (InterP…	terpene synthase/cyclase family protein	-0.951642	-2.06559	-2.58504	-1.02447	-0.878814	-1.73628	-2.39491	-2.19606	-2.97402
CATMA3A36640	AT3G43800	Encodes glutathione transferase belonging to the tau class of GSTs. Naming convention according to Wagner et al. (2002).	glutathione S-transferase, putative	-0.82945	-1.38369	-1.33894	-1.04643	-0.612474	-1.5034	-1.26397	-1.36356	-1.31433
CATMA3A40350	AT3G47340	encodes a glutamine-dependent asparagine synthetase, the predicted ASN1 peptide contains a purF-type glutamine-binding domain, and is expressed predominantly in shoot tissues, where light has a negative effect on its mRNA accumulation. Expression is induced within 3 hours of dark treatment, in senescing leaves and treatment with exogenous photosynthesis inhibitor. Induction of gene expression was…	asparagine synthetase 1 (glutamine-hydro	1.65268	2.25011	2.12152	1.82209	1.48327	2.13897	2.36125	2.71044	1.53259
CATMA3A40490	AT3G47480	Calcium-binding EF-hand family protein; FUNCTIONS IN: calcium ion binding; INVOLVED IN: biological_process unknown; LOCATED IN: endomembrane system; EXPRESSED IN: 10 plant structures; EXPRESSED DURING: 9 growth stages; CONTAINS InterPro DOMAIN/s: EF-Hand 1, calcium-binding site (InterPro:IPR018247), EF-HAND 2 (InterPro:IPR018249), EF-hand-like domain (InterPro:IPR011992), Calcium-binding EF-hand …	calcium-binding EF hand family protein	1.23554	2.1382	2.14736	1.71994	0.751154	2.30481	1.97158	2.39705	1.89767
CATMA3A42560	AT3G49530	Transcription factor that serves as a molecular link between cold signals and pathogen resistance responses. Undergoes proteolytic processing triggered by cold-induced changes in membrane fluidity.	No AGI match	1.5036	1.61066	1.66006	1.75408	1.25312	1.85721	1.36412	1.95287	1.36725
CATMA3A43010	AT3G49960	Its expression is enriched in root hair cells (compared to non-root hair cells) and this enrichment is associated with increase in the transcription-associated mark trimethylation of H3 lysine 4 (H3K4me3) and decrease in the Polycomb silencing-associated mark trimethylation of H3 lysine 27 (H3K27me3) in root hair cells relative to non-root hair cells.	peroxidase, putative	-1.55602	-2.05732	-3.37257	-1.40597	-1.70606	-2.1106	-2.00404	-3.80952	-2.93562
CATMA3A43940	AT3G50930	cytochrome BC1 synthesis (BCS1); FUNCTIONS IN: nucleoside-triphosphatase activity, ATPase activity, nucleotide binding, ATP binding; LOCATED IN: mitochondrion; EXPRESSED IN: 24 plant structures; EXPRESSED DURING: 13 growth stages; CONTAINS InterPro DOMAIN/s: ATPase, AAA-type, core (InterPro:IPR003959), ATPase, AAA+ type, core (InterPro:IPR003593), ATPase, AAA-type, conserved site (InterPro:IPR003…	AAA-type ATPase family protein	2.18607	2.80156	2.09884	2.4434	1.92874	2.41916	3.18397	2.41319	1.7845
CATMA3A47350	AT3G54420	encodes an EP3 chitinase that is expressed during somatic embryogenesis in 'nursing' cells surrounding the embryos but not in embryos themselves. The gene is also expressed in mature pollen and growing pollen tubes until they enter the receptive synergid, but not in endosperm and integuments as in carrot. Post-embryonically, expression is found in hydathodes, stipules, root epidermis and emerging…	class IV chitinase (CHIV)	-1.48747	-1.25361	-2.17821	-1.25991	-1.71503	-1.2065	-1.30073	-2.12373	-2.23269
CATMA3A47520	AT3G54580	Proline-rich extensin-like family protein; FUNCTIONS IN: structural constituent of cell wall; INVOLVED IN: plant-type cell wall organization; LOCATED IN: endomembrane system; EXPRESSED IN: male gametophyte, root, pollen tube; EXPRESSED DURING: L mature pollen stage; CONTAINS InterPro DOMAIN/s: Extensin-like repeat (InterPro:IPR006706); BEST Arabidopsis thaliana protein match is: Proline-rich exte…	No AGI match	-1.16643	-2.52473	-4.06714	-0.728167	-1.60469	-2.41009	-2.63938	-4.26326	-3.87102
CATMA3A49380	AT3G56400	member of WRKY Transcription Factor; Group III. Function as activator of SA-dependent defense genes and a repressor of JA-regulated genes. WRKY70-controlled suppression of JA-signaling is partly executed by NPR1.	WRKY family transcription factor	1.90508	2.66555	2.78093	2.24085	1.5693	2.39623	2.93486	2.96668	2.59518
CATMA3A50890	AT3G57880	Calcium-dependent lipid-binding (CaLB domain) plant phosphoribosyltransferase family protein; FUNCTIONS IN: molecular_function unknown; INVOLVED IN: tryptophan biosynthetic process; LOCATED IN: endoplasmic reticulum, cell wall; EXPRESSED IN: 24 plant structures; EXPRESSED DURING: 13 growth stages; CONTAINS InterPro DOMAIN/s: C2 membrane targeting protein (InterPro:IPR018029), C2 calcium/lipid-bin…	C2 domain-containing protein	0.887854	1.99988	1.61761	0.9992	0.776509	1.88242	2.11735	1.5427	1.69253
CATMA3A53140	AT3G60130	beta glucosidase 16 (BGLU16); FUNCTIONS IN: cation binding, hydrolase activity, hydrolyzing O-glycosyl compounds, catalytic activity; INVOLVED IN: carbohydrate metabolic process; EXPRESSED IN: 23 plant structures; EXPRESSED DURING: 13 growth stages; CONTAINS InterPro DOMAIN/s: Glycoside hydrolase, family 1 (InterPro:IPR001360), Glycoside hydrolase, family 1, active site (InterPro:IPR018120), Glyc…	glycosyl hydrolase family 1 protein / be	1.76794	2.50114	2.85914	1.61787	1.918	2.51376	2.48853	3.00638	2.7119
CATMA3A53430	AT3G60420	Phosphoglycerate mutase family protein; LOCATED IN: cellular_component unknown; EXPRESSED IN: 17 plant structures; EXPRESSED DURING: 10 growth stages; CONTAINS InterPro DOMAIN/s: Histidine phosphatase superfamily, clade-1 (InterPro:IPR013078); BEST Arabidopsis thaliana protein match is: Phosphoglycerate mutase family protein (TAIR:AT3G60450.1); Has 30201 Blast hits to 17322 proteins in 780 specie…	expressed protein	1.31903	1.83433	3.33068	1.77064	0.867423	1.85394	1.81472	4.08276	2.57859
CATMA3A55410	AT3G62260	Protein phosphatase 2C family protein; FUNCTIONS IN: protein serine/threonine phosphatase activity, catalytic activity; INVOLVED IN: protein amino acid dephosphorylation; LOCATED IN: protein serine/threonine phosphatase complex; EXPRESSED IN: 22 plant structures; EXPRESSED DURING: 12 growth stages; CONTAINS InterPro DOMAIN/s: Protein phosphatase 2C, manganese/magnesium aspartate binding site (Int…	protein phosphatase 2C, putative / PP2C,	1.26107	2.0285	2.84598	1.356	1.16614	1.98076	2.07624	2.9485	2.74346
CATMA4A02540	AT4G02270	root hair specific 13 (RHS13); FUNCTIONS IN: molecular_function unknown; INVOLVED IN: biological_process unknown; LOCATED IN: endomembrane system; EXPRESSED IN: hypocotyl, root hair, root; CONTAINS InterPro DOMAIN/s: Pollen Ole e 1 allergen/extensin (InterPro:IPR006041); BEST Arabidopsis thaliana protein match is: Pollen Ole e 1 allergen and extensin family protein (TAIR:AT2G47540.1); Has 108 Bla…	pollen Ole e 1 allergen and extensin fam	-1.40823	-3.25909	-4.59968	-0.934651	-1.88182	-2.53692	-3.98126	-4.653	-4.54636
CATMA4A05135	AT4G04610	Encodes a protein disulfide isomerase-like (PDIL) protein, a member of a multigene family within the thioredoxin (TRX) superfamily. This protein also belongs to the adenosine 5'-phosphosulfate reductase-like (APRL) group.	5'-adenylylsulfate reductase (APR1) / PA	-2.91754	-1.37093	-2.34722	-2.31372	-3.52135	-1.32637	-1.41549	-2.87422	-1.82022
CATMA4A12240	AT4G12120	member of KEULE Gene Family	cytokinesis-related Sec1 protein, putati	1.00706	1.44341	1.24133	1.10325	0.910868	1.61511	1.27171	1.24307	1.23959
CATMA4A20925	AT4G19690	The gene encodes Fe2+ transporter protein. It is a member of the Zrt/Irt-like protein (ZIP) family of transporters. AtIRT1 has broad specificity for divalent heavy metals, mediating the transport of zinc, manganese, cobalt and cadmium under Fe-deficient conditions. IRT1 is monoubiquitinated to promote endocytic trafficking.	iron-responsive transporter (IRT1)	-1.06775	-2.22487	-3.10419	-0.767189	-1.36831	-2.2947	-2.15505	-3.10184	-3.10655
CATMA4A23690	AT4G22010	SKU5 similar 4 (sks4); FUNCTIONS IN: oxidoreductase activity, copper ion binding; INVOLVED IN: oxidation reduction; LOCATED IN: membrane, plant-type cell wall; EXPRESSED IN: 22 plant structures; EXPRESSED DURING: 14 growth stages; CONTAINS InterPro DOMAIN/s: Multicopper oxidase, type 3 (InterPro:IPR011707), Cupredoxin (InterPro:IPR008972), Multicopper oxidase, type 2 (InterPro:IPR011706), Multico…	multi-copper oxidase type I family prote	-1.47145	-1.22999	-2.51946	-1.25061	-1.69229	-1.31906	-1.14093	-2.92095	-2.11798
CATMA4A27360	AT4G25670	unknown protein; BEST Arabidopsis thaliana protein match is: unknown protein (TAIR:AT4G25690.2); Has 30201 Blast hits to 17322 proteins in 780 species: Archae - 12; Bacteria - 1396; Metazoa - 17338; Fungi - 3422; Plants - 5037; Viruses - 0; Other Eukaryotes - 2996 (source: NCBI BLink).	No AGI match	1.05529	1.24898	1.98451	1.0326	1.07797	1.16946	1.32851	2.07139	1.89762
CATMA4A27640	AT4G26010	Peroxidase superfamily protein; FUNCTIONS IN: peroxidase activity, heme binding; INVOLVED IN: oxidation reduction, response to oxidative stress; LOCATED IN: endomembrane system; EXPRESSED IN: root; CONTAINS InterPro DOMAIN/s: Haem peroxidase (InterPro:IPR010255), Plant peroxidase (InterPro:IPR000823), Peroxidase, active site (InterPro:IPR019794), Haem peroxidase, plant/fungal/bacterial (InterPro:…	peroxidase, putative	-1.76598	-2.85241	-3.77406	-1.6168	-1.91517	-3.02641	-2.67841	-4.19337	-3.35476
CATMA4A36503	AT4G34710	encodes a arginine decarboxylase (ADC), a rate-limiting enzyme that catalyzes the first step of polyamine (PA) biosynthesis via ADC pathway in Arabidopsis thaliana. Arabidopsis genome has two ADC paralogs, ADC1 and ADC2. ADC2 is stress-inducible (osmotic stress). Double mutant analysis showed that ADC genes are essential for the production of PA, and are required for normal seed development. Over…	No AGI match $	1.52044	2.137	3.42936	1.40684	1.63404	1.99188	2.28212	3.19589	3.66283
CATMA4A38530	AT4G36950	member of MEKK subfamily	No AGI match	1.62629	1.82445	1.5643	1.53	1.72258	1.63055	2.01835	1.43817	1.69043
CATMA4A38520	AT4G36950	member of MEKK subfamily	pseudogene, similar to OSJNBa0042L16.2	1.10392	0.606178	0.0113596	1.30773	0.900098	0.860846	0.351509	-0.0907834	0.113503
CATMA4A38960	AT4G37390	Encodes an IAA-amido synthase that conjugates Asp and other amino acids to auxin in vitro. Lines carrying insertions in this gene are hypersensitive to auxin. May function as a negative component in auxin signaling by regulating auxin activity.	auxin-responsive GH3 family protein	1.20481	1.65776	2.33772	1.62804	0.781573	1.56916	1.74636	2.54004	2.1354
CATMA4A39085	AT4G37520	Peroxidase superfamily protein; FUNCTIONS IN: protein binding, peroxidase activity; INVOLVED IN: oxidation reduction, response to oxidative stress; LOCATED IN: cytoplasm; CONTAINS InterPro DOMAIN/s: Haem peroxidase (InterPro:IPR010255), Plant peroxidase (InterPro:IPR000823), Peroxidases heam-ligand binding site (InterPro:IPR019793), Haem peroxidase, plant/fungal/bacterial (InterPro:IPR002016); BE…	peroxidase 50 (PER50) (P50) (PRXR2)	-2.29683	-1.76263	-2.56591	-2.28058	-2.31309	-1.40869	-2.11657	-3.15786	-1.97396
CATMA5A04520	AT5G05340	Peroxidase superfamily protein; FUNCTIONS IN: protein binding, peroxidase activity; INVOLVED IN: response to oxidative stress, oxidation reduction; LOCATED IN: apoplast, cell wall; EXPRESSED IN: 9 plant structures; EXPRESSED DURING: LP.04 four leaves visible, 4 anthesis, C globular stage, petal differentiation and expansion stage; CONTAINS InterPro DOMAIN/s: Haem peroxidase (InterPro:IPR010255), …	peroxidase, putative	1.61709	2.22191	2.2904	1.59953	1.63466	2.51483	1.92899	2.62315	1.95766
CATMA5A04600	AT5G05440	Encodes a member of the PYR (pyrabactin resistance )/PYL(PYR1-like)/RCAR (regulatory components of ABA receptor) family proteins with 14 members. PYR/PYL/RCAR family proteins function as abscisic acid sensors. Mediate ABA-dependent regulation of protein phosphatase 2Cs ABI1 and ABI2.	expressed protein	-1.12092	-1.27436	-1.64738	-0.973794	-1.26804	-1.21669	-1.33203	-1.78682	-1.50794
CATMA5A04670	AT5G05500	Pollen Ole e 1 allergen and extensin family protein; FUNCTIONS IN: molecular_function unknown; INVOLVED IN: biological_process unknown; LOCATED IN: endomembrane system; EXPRESSED IN: root; CONTAINS InterPro DOMAIN/s: Pollen Ole e 1 allergen/extensin (InterPro:IPR006041); BEST Arabidopsis thaliana protein match is: Pollen Ole e 1 allergen and extensin family protein (TAIR:AT2G34700.1); Has 30201 B…	pollen Ole e 1 allergen and extensin fam	-1.90684	-3.96618	-3.89094	-2.04616	-1.76753	-3.77056	-4.16179	-4.67969	-3.10219
CATMA5A05530	AT5G06320	encodes a protein whose sequence is similar to tobacco hairpin-induced gene (HIN1) and Arabidopsis non-race specific disease resistance gene (NDR1). Expression of this gene is induced by cucumber mosaic virus, spermine and Pseudomonas syringae pv. tomato DC3000. The gene product is localized to the plasma membrane.	harpin-induced family protein / HIN1 fam	1.82771	2.61141	2.48924	2.52253	1.13289	3.01344	2.20938	2.84151	2.13696
CATMA5A08890	AT5G10130	Pollen Ole e 1 allergen and extensin family protein; FUNCTIONS IN: molecular_function unknown; INVOLVED IN: biological_process unknown; LOCATED IN: extracellular space, endomembrane system; EXPRESSED IN: root; CONTAINS InterPro DOMAIN/s: Pollen Ole e 1 allergen/extensin (InterPro:IPR006041), Allergen Ole e 1, conserved site (InterPro:IPR006040); BEST Arabidopsis thaliana protein match is: Pollen …	pollen Ole e 1 allergen and extensin fam	-0.721775	-1.90164	-2.57213	-0.829743	-0.613807	-2.27557	-1.52771	-3.32059	-1.82368
CATMA5A14160	AT5G15890	Encodes a member of the TBL (TRICHOME BIREFRINGENCE-LIKE) gene family containing a plant-specific DUF231 (domain of unknown function) domain. TBL gene family has 46 members, two of which (TBR/AT5G06700 and TBL3/AT5G01360) have been shown to be involved in the synthesis and deposition of secondary wall cellulose, presumably by influencing the esterification state of pectic polymers. A nomenclature…	expressed protein	-1.00834	-1.57733	-2.00461	-1.11632	-0.900364	-1.60385	-1.55081	-2.30467	-1.70456
CATMA5A16550	AT5G18270	Arabidopsis NAC domain containing protein 87 (ANAC087); FUNCTIONS IN: sequence-specific DNA binding transcription factor activity; INVOLVED IN: multicellular organismal development, regulation of transcription; LOCATED IN: cellular_component unknown; EXPRESSED IN: 12 plant structures; EXPRESSED DURING: LP.06 six leaves visible, LP.04 four leaves visible, 4 anthesis, C globular stage, petal differ…	no apical meristem (NAM) family protein	1.12256	1.51403	2.46212	1.45973	0.785388	1.50081	1.52725	2.575	2.34925
CATMA5A18670	AT5G20230	Al-stress-induced gene	plastocyanin-like domain-containing prot	2.88353	2.41088	2.2102	3.40611	2.36096	2.68193	2.13984	2.84159	1.57881
CATMA5A24040	AT5G26340	Encodes a protein with high affinity, hexose-specific/H+ symporter activity. The activity of the transporter appears to be negatively regulated by phosphorylation. Importantly, microarray analysis, as well as the study of the expression of this gene in mutants involved in programmed cell death (PCD) demonstrated a tight correlation between this gene's expression and PCD.	hexose transporter, putative	1.20051	1.83535	2.46142	1.14159	1.25942	1.5055	2.1652	2.58925	2.3336
CATMA5A35240	AT5G39670	Calcium-binding EF-hand family protein; FUNCTIONS IN: calcium ion binding; INVOLVED IN: biological_process unknown; LOCATED IN: cellular_component unknown; EXPRESSED IN: 21 plant structures; EXPRESSED DURING: 13 growth stages; CONTAINS InterPro DOMAIN/s: EF-Hand 1, calcium-binding site (InterPro:IPR018247), EF-HAND 2 (InterPro:IPR018249), EF-hand-like domain (InterPro:IPR011992), Calcium-binding …	calcium-binding EF hand family protein	1.33061	1.75404	2.32316	1.68619	0.97503	1.93666	1.57142	2.63196	2.01436
CATMA5A36240	AT5G40590	Cysteine/Histidine-rich C1 domain family protein; CONTAINS InterPro DOMAIN/s: DC1 (InterPro:IPR004146), C1-like (InterPro:IPR011424); BEST Arabidopsis thaliana protein match is: Cysteine/Histidine-rich C1 domain family protein (TAIR:AT2G44370.1); Has 1807 Blast hits to 1807 proteins in 277 species: Archae - 0; Bacteria - 0; Metazoa - 736; Fungi - 347; Plants - 385; Viruses - 0; Other Eukaryotes -…	DC1 domain-containing protein	-1.35611	-1.91023	-2.40342	-1.25377	-1.45845	-1.8501	-1.97035	-2.22157	-2.58527
CATMA5A37730	AT5G42010	Transducin/WD40 repeat-like superfamily protein; CONTAINS InterPro DOMAIN/s: WD40 repeat 2 (InterPro:IPR019782), WD40 repeat, conserved site (InterPro:IPR019775), WD40 repeat (InterPro:IPR001680), G-protein beta WD-40 repeat, region (InterPro:IPR020472), WD40 repeat-like-containing domain (InterPro:IPR011046), WD40-repeat-containing domain (InterPro:IPR017986), WD40/YVTN repeat-like-containing do…	WD-40 repeat family protein	-1.67423	-1.19061	-1.24533	-1.29447	-2.05399	-1.17	-1.21123	-1.16503	-1.32562
CATMA5A38600	AT5G42785	unknown protein; FUNCTIONS IN: molecular_function unknown; INVOLVED IN: biological_process unknown; LOCATED IN: endomembrane system; Has 30201 Blast hits to 17322 proteins in 780 species: Archae - 12; Bacteria - 1396; Metazoa - 17338; Fungi - 3422; Plants - 5037; Viruses - 0; Other Eukaryotes - 2996 (source: NCBI BLink).	hypothetical protein	-1.1532	-2.03446	-2.20192	-1.21297	-1.09342	-1.94692	-2.122	-2.32147	-2.08236
CATMA5A40920	AT5G45080	phloem protein 2-A6 (PP2-A6); FUNCTIONS IN: carbohydrate binding; INVOLVED IN: signal transduction, defense response, innate immune response; LOCATED IN: intrinsic to membrane; EXPRESSED IN: 9 plant structures; EXPRESSED DURING: 9 growth stages; CONTAINS InterPro DOMAIN/s: Toll-Interleukin receptor (InterPro:IPR000157); BEST Arabidopsis thaliana protein match is: phloem protein 2-A8 (TAIR:AT5G450…	disease resistance protein-related	-2.72554	-2.46577	-3.49353	-2.14793	-3.30314	-2.16805	-2.76348	-3.40852	-3.57854
CATMA5A40930	AT5G45090	phloem protein 2-A7 (PP2-A7); FUNCTIONS IN: carbohydrate binding; INVOLVED IN: signal transduction, defense response, innate immune response; LOCATED IN: intrinsic to membrane; EXPRESSED IN: 7 plant structures; EXPRESSED DURING: 4 anthesis, F mature embryo stage, 4 leaf senescence stage; CONTAINS InterPro DOMAIN/s: Toll-Interleukin receptor (InterPro:IPR000157); BEST Arabidopsis thaliana protein …	lectin-related	-1.02336	-1.27884	-1.25228	-0.808875	-1.23784	-1.15321	-1.40447	-1.1602	-1.34437
CATMA5A40970	AT5G45110	Encodes a paralog of NPR1. Involved in negative regulation of defense responses against bacterial and oomycete pathogens. npr3 mutants has elevated level of PR1 expression. Interacts with TGA2, TGA3, TGA5 and TGA6 in yeast two hybrid assays.	ankyrin repeat family protein / BTB/POZ	1.47505	2.18515	1.60876	1.99858	0.951527	2.54104	1.82926	1.72601	1.49151
CATMA5A41330	AT5G45380	DEGRADATION OF UREA 3 (DUR3); CONTAINS InterPro DOMAIN/s: Sodium/solute symporter, subgroup (InterPro:IPR019900), Sodium/solute symporter (InterPro:IPR001734); Has 9388 Blast hits to 9377 proteins in 1702 species: Archae - 173; Bacteria - 6389; Metazoa - 719; Fungi - 340; Plants - 51; Viruses - 0; Other Eukaryotes - 1716 (source: NCBI BLink).	sodium:solute symporter family protein	-1.59414	-2.15073	-4.43295	-1.40561	-1.78266	-2.14965	-2.15182	-4.28071	-4.5852
CATMA5A41420	AT5G45480	Protein of unknown function (DUF594); FUNCTIONS IN: molecular_function unknown; INVOLVED IN: biological_process unknown; LOCATED IN: plasma membrane; EXPRESSED IN: 17 plant structures; EXPRESSED DURING: 12 growth stages; CONTAINS InterPro DOMAIN/s: Protein of unknown function DUF594 (InterPro:IPR007658); BEST Arabidopsis thaliana protein match is: Protein of unknown function (DUF594) (TAIR:AT5G45…	expressed protein	-2.21629	-1.16752	-2.65219	-2.07596	-2.35662	-1.11549	-1.21954	-3.19141	-2.11296
CATMA5A44160	AT5G48180	Encodes a nitrile-specifier protein NSP5. NSP5 is one out of five (At3g16400/NSP1, At2g33070/NSP2, At3g16390/NSP3, At3g16410/NSP4 and At5g48180/NSP5) A. thaliana epithiospecifier protein (ESP) homologues that promote simple nitrile, but not epithionitrile or thiocyanate formation.	kelch repeat-containing protein	1.11158	1.85075	2.96763	1.15837	1.06479	2.08327	1.61824	3.11663	2.81863
CATMA5A44410	AT5G48430	Eukaryotic aspartyl protease family protein; FUNCTIONS IN: aspartic-type endopeptidase activity; INVOLVED IN: proteolysis; LOCATED IN: endomembrane system; EXPRESSED IN: shoot apex, hypocotyl, root, leaf; CONTAINS InterPro DOMAIN/s: Peptidase aspartic (InterPro:IPR021109), Peptidase aspartic, catalytic (InterPro:IPR009007), Peptidase A1 (InterPro:IPR001461); BEST Arabidopsis thaliana protein matc…	expressed protein	-3.19876	-3.85958	-3.41605	-3.3717	-3.02583	-3.2955	-4.42367	-4.2038	-2.62831
CATMA5A45500	AT5G49520	Encodes WRKY48, a member of the WRKY Transcription Factor. WRKY48 is a stress- and pathogen-induced transcriptional activator that represses plant basal defense.	WRKY family transcription factor	1.47945	1.44992	1.49887	1.61153	1.34738	1.39268	1.50717	1.76027	1.23747
CATMA5A50230	AT5G54370	Late embryogenesis abundant (LEA) protein-related; FUNCTIONS IN: molecular_function unknown; INVOLVED IN: biological_process unknown; LOCATED IN: endomembrane system; EXPRESSED IN: root; CONTAINS InterPro DOMAIN/s: Root cap (InterPro:IPR009646); BEST Arabidopsis thaliana protein match is: Late embryogenesis abundant (LEA) protein-related (TAIR:AT4G27400.1); Has 1807 Blast hits to 1807 proteins in…	late embryogenesis abundant protein-rela	-0.91921	-2.31623	-3.27638	-0.963753	-0.874667	-2.09	-2.54246	-3.76883	-2.78392
CATMA5A52120	AT5G56320	member of Alpha-Expansin Gene Family. Naming convention from the Expansin Working Group (Kende et al, 2004. Plant Mol Bio)	expansin, putative (EXP14)	-1.05805	-1.7904	-2.30889	-1.06844	-1.04766	-1.93549	-1.64531	-2.5288	-2.08899
CATMA5A53230	AT5G57510	unknown protein; Has 27 Blast hits to 27 proteins in 9 species: Archae - 0; Bacteria - 0; Metazoa - 0; Fungi - 0; Plants - 27; Viruses - 0; Other Eukaryotes - 0 (source: NCBI BLink).	hypothetical protein	1.3513	1.67374	2.05146	1.62597	1.07663	1.60096	1.74651	2.26454	1.83838
CATMA5A53330	AT5G57625	CAP (Cysteine-rich secretory proteins, Antigen 5, and Pathogenesis-related 1 protein) superfamily protein; FUNCTIONS IN: molecular_function unknown; INVOLVED IN: biological_process unknown; LOCATED IN: endomembrane system, extracellular region; CONTAINS InterPro DOMAIN/s: Allergen V5/Tpx-1 related, conserved site (InterPro:IPR018244), Allergen V5/Tpx-1 related (InterPro:IPR001283), Ves allergen (…	allergen V5/Tpx-1-related family protein	-1.42887	-3.09245	-3.72546	-1.41747	-1.44026	-2.69159	-3.49332	-4.66295	-2.78797
CATMA5A54470	AT5G58750	NAD(P)-binding Rossmann-fold superfamily protein; BEST Arabidopsis thaliana protein match is: NAD(P)-binding Rossmann-fold superfamily protein (TAIR:AT4G24220.2); Has 1807 Blast hits to 1807 proteins in 277 species: Archae - 0; Bacteria - 0; Metazoa - 736; Fungi - 347; Plants - 385; Viruses - 0; Other Eukaryotes - 339 (source: NCBI BLink).	wound-responsive protein-related	-1.08592	-1.26706	-1.50572	-0.890364	-1.28147	-1.16932	-1.36479	-1.37895	-1.6325
CATMA5A59575	AT5G64100	Peroxidase superfamily protein; FUNCTIONS IN: peroxidase activity, heme binding; INVOLVED IN: oxidation reduction, response to oxidative stress; LOCATED IN: cell wall; EXPRESSED IN: hypocotyl, root, callus; EXPRESSED DURING: seedling growth; CONTAINS InterPro DOMAIN/s: Haem peroxidase (InterPro:IPR010255), Plant peroxidase (InterPro:IPR000823), Peroxidases heam-ligand binding site (InterPro:IPR01…	peroxidase, putative	-1.01668	-2.33961	-2.19723	-0.880986	-1.15237	-1.88726	-2.79195	-1.99118	-2.40328
CATMA5A60235	AT5G64810	member of WRKY Transcription Factor; Group II-c. Involved in jasmonic acid inducible defense responses.	WRKY family transcription factor	1.80354	2.25231	2.76039	1.94193	1.66514	2.05174	2.45287	2.9945	2.52628

## Sheet: FunCat.output
FUNCTIONAL CATEGORY	P-VALUE	abs SET	rel SET	genes SET	abs GENOME	rel GENOME	rel SETminusGENOME
32.01.01 oxidative stress response	2.27753e-11	12	10.8	AT1G05240 AT1G05250 AT1G30870 AT3G01190 AT3G17790 AT3G49960 AT4G26010 AT4G34710 AT4G37520 AT5G05340 AT5G20230 AT5G64100	200	0.70	10.1
32.07.07.05 peroxidase reaction	1.22893e-10	9	8.10	AT1G05240 AT1G05250 AT1G30870 AT3G01190 AT3G49960 AT4G26010 AT4G37520 AT5G05340 AT5G64100	94	0.33	7.77
32 CELL RESCUE, DEFENSE AND VIRULENCE	5.636e-09	23	20.7	AT1G05240 AT1G05250 AT1G17420 AT1G30870 AT1G74710 AT2G35980 AT2G46680 AT3G01190 AT3G09270 AT3G15500 AT3G17790 AT3G43800 AT3G49960 AT3G56400 AT4G26010 AT4G34710 AT4G37520 AT5G05340 AT5G06320 AT5G20230 AT5G45080 AT5G45090 AT5G64100	1425	5.01	15.69
32.07.07 oxygen and radical detoxification	6.70095e-09	11	9.90	AT1G05240 AT1G05250 AT1G30870 AT3G01190 AT3G09270 AT3G43800 AT3G49960 AT4G26010 AT4G37520 AT5G05340 AT5G64100	261	0.91	8.99
32.07 detoxification	8.15684e-09	11	9.90	AT1G05240 AT1G05250 AT1G30870 AT3G01190 AT3G09270 AT3G43800 AT3G49960 AT4G26010 AT4G37520 AT5G05340 AT5G64100	266	0.93	8.97
32.01 stress response	8.7855e-07	15	13.5	AT1G05240 AT1G05250 AT1G17420 AT1G30870 AT2G46680 AT3G01190 AT3G15500 AT3G17790 AT3G49960 AT4G26010 AT4G34710 AT4G37520 AT5G05340 AT5G20230 AT5G64100	832	2.92	10.58
34 INTERACTION WITH THE ENVIRONMENT	7.0604e-05	18	16.2	AT1G01580 AT1G03870 AT1G07730 AT1G33900 AT1G74710 AT2G23170 AT2G28670 AT2G34650 AT2G46680 AT3G15500 AT3G17790 AT3G47340 AT3G56400 AT4G19690 AT4G34710 AT4G37390 AT5G06320 AT5G20230	1651	5.81	10.39
01.20 secondary metabolism	0.000274969	8	7.20	AT1G17420 AT1G74710 AT3G09270 AT3G19450 AT3G24503 AT3G43800 AT3G56400 AT4G34710	426	1.49	5.71
70.01 cell wall	0.000297299	8	7.20	AT1G05240 AT1G11580 AT1G12560 AT1G23720 AT3G28550 AT3G54580 AT5G42010 AT5G56320	431	1.51	5.69
42.01 cell wall	0.000597672	6	5.40	AT1G11580 AT1G12560 AT1G23720 AT3G28550 AT3G54580 AT5G56320	263	0.92	4.48
20.01.01.01.01 heavy metal ion transport (Cu+, Fe3+, etc.)	0.00105422	3	2.70	AT1G01580 AT4G19690 AT5G20230	51	0.17	2.53
34.11.10 response to biotic stimulus	0.00110237	6	5.40	AT1G07730 AT1G33900 AT1G74710 AT2G28670 AT3G56400 AT5G06320	296	1.04	4.36
34.11 cellular sensing and response to external stimulus	0.00199795	14	12.6	AT1G07730 AT1G33900 AT1G74710 AT2G23170 AT2G28670 AT2G34650 AT2G46680 AT3G15500 AT3G47340 AT3G56400 AT4G34710 AT4G37390 AT5G06320 AT5G20230	1489	5.24	7.36
32.05 disease, virulence and defense	0.00223085	7	6.30	AT1G17420 AT1G74710 AT2G35980 AT3G56400 AT5G06320 AT5G45080 AT5G45090	460	1.61	4.69
36 SYSTEMIC INTERACTION WITH THE ENVIRONMENT	0.0029139	9	8.10	AT1G17420 AT1G74710 AT2G23170 AT2G34650 AT2G46680 AT3G56400 AT4G34710 AT4G37390 AT5G20230	757	2.66	5.44
34.01 homeostasis	0.00344071	3	2.70	AT1G01580 AT3G17790 AT4G19690	77	0.27	2.43
36.25.16.08 response to wounding	0.00383197	3	2.70	AT1G17420 AT4G34710 AT5G20230	80	0.28	2.42
70.27.01 extracellular matrix component	0.00618883	3	2.70	AT1G12560 AT5G56320 AT5G57625	95	0.33	2.37
70.27 extracellular / secretion proteins	0.00693467	3	2.70	AT1G12560 AT5G56320 AT5G57625	99	0.34	2.36
36.25.16 immune response	0.00712909	3	2.70	AT1G17420 AT4G34710 AT5G20230	100	0.35	2.35
20.01.01.01.01.01 siderophore-iron transport	0.0077982	1	0.90	AT1G01580	2	0.00	0.9
36.20.16.05 systemic acquired resistance	0.00782046	2	1.80	AT1G74710 AT3G56400	34	0.11	1.69
36.25 animal specific systemic sensing and response	0.00858064	3	2.70	AT1G17420 AT4G34710 AT5G20230	107	0.37	2.33
01.01.06.02.01 biosynthesis of asparagine	0.0116747	1	0.90	AT3G47340	3	0.01	0.89
01.02.03.03 assimilatory reduction of sulfur	0.0116747	1	0.90	AT4G04610	3	0.01	0.89
01.20.35 metabolism of secondary products derived from L-phenylalanine and L-tyrosine	0.0142069	3	2.70	AT1G74710 AT3G19450 AT3G24503	129	0.45	2.25
01.20.38 metabolism of toxins/drugs	0.015177	2	1.80	AT3G09270 AT3G43800	48	0.16	1.64
34.11.03 chemoperception and response	0.0174386	8	7.20	AT2G23170 AT2G34650 AT2G46680 AT3G15500 AT3G47340 AT3G56400 AT4G34710 AT4G37390	841	2.95	4.25
42 BIOGENESIS OF CELLULAR COMPONENTS	0.0183383	12	10.8	AT1G11580 AT1G12560 AT1G23720 AT1G80590 AT2G46400 AT2G46680 AT3G28550 AT3G54580 AT3G56400 AT5G49520 AT5G56320 AT5G64810	1554	5.46	5.34
36.20 plant / fungal specific systemic sensing and response	0.0190141	7	6.30	AT1G74710 AT2G23170 AT2G34650 AT2G46680 AT3G56400 AT4G34710 AT4G37390	692	2.43	3.87
32.07.07.03 glutathione conjugation reaction	0.0209918	2	1.80	AT3G09270 AT3G43800	57	0.20	1.6
34.01.01.01 homeostasis of metal ions (Na, K, Ca etc.)	0.0216868	2	1.80	AT1G01580 AT4G19690	58	0.20	1.6
34.01.01 homeostasis of cations	0.0231052	2	1.80	AT1G01580 AT4G19690	60	0.21	1.59
01.20.31 metabolism of secondary products derived from L-lysine, L-arginine and L-histidine	0.0232143	1	0.90	AT4G34710	6	0.02	0.88
34.01.03 homeostasis of anions	0.0232143	1	0.90	AT3G17790	6	0.02	0.88
34.01.03.03 homeostasis of phosphate	0.0232143	1	0.90	AT3G17790	6	0.02	0.88
36.20.18 plant hormonal regulation	0.0282428	6	5.40	AT2G23170 AT2G34650 AT2G46680 AT3G56400 AT4G34710 AT4G37390	589	2.07	3.33
20.03.02.02.02 sodium driven symporter	0.030833	1	0.90	AT5G45380	8	0.02	0.88
20.01.01.07.01 nitrate transport	0.0383929	1	0.90	AT1G12940	10	0.03	0.87
01.01.03.01 metabolism of glutamine	0.0421509	1	0.90	AT4G34710	11	0.03	0.87
01.01.05.01.01 biosynthesis of polyamines	0.0421509	1	0.90	AT4G34710	11	0.03	0.87
30.01.09.08 hormone mediated signal transduction	0.0465835	3	2.70	AT2G34650 AT2G46680 AT3G15500	205	0.72	1.98
01.02.03.01 sulfate assimilation	0.0496233	1	0.90	AT4G04610	13	0.04	0.86
01.01.05.01 metabolism of polyamines	0.0533378	1	0.90	AT4G34710	14	0.04	0.86
01.01.06.02 metabolism of asparagine	0.0533378	1	0.90	AT3G47340	14	0.04	0.86
01.05.03.03 chitin metabolism	0.0533378	1	0.90	AT3G54420	14	0.04	0.86
01.05.03.03.07 chitin catabolism	0.0533378	1	0.90	AT3G54420	14	0.04	0.86
47.02.01.05 seed	0.0607237	1	0.90	AT4G34710	16	0.05	0.85
36.20.18.01 auxin response	0.0707485	3	2.70	AT2G23170 AT2G34650 AT4G37390	244	0.85	1.85
01.20.35.01 metabolism of phenylpropanoids	0.0768436	2	1.80	AT3G19450 AT3G24503	117	0.41	1.39
34.11.03.12 water response	0.0791129	2	1.80	AT2G46680 AT3G15500	119	0.41	1.39
40.01 cell growth / morphogenesis	0.0791231	3	2.70	AT1G12560 AT1G17420 AT5G56320	256	0.90	1.8
20.03.01 channel / pore class transport	0.0837135	2	1.80	AT2G25810 AT2G34390	123	0.43	1.37
36.20.16 plant defense response	0.0848763	2	1.80	AT1G74710 AT3G56400	124	0.43	1.37
01.01.05 metabolism of urea cycle, creatine and polyamines	0.0861274	1	0.90	AT4G34710	23	0.08	0.82
01.20.05 metabolism of acetic acid derivatives	0.0861274	1	0.90	AT1G17420	23	0.08	0.82
36.20.16.03 jasmonic acid/ethylene dependent systemic resistance	0.0932598	1	0.90	AT3G56400	25	0.08	0.82
40 CELL FATE	0.100117	4	3.60	AT1G12560 AT1G17420 AT3G54420 AT5G56320	450	1.58	2.02
20.01.01 ion transport	0.105028	4	3.60	AT1G01580 AT1G12940 AT4G19690 AT5G20230	458	1.61	1.99
01.01.09.06.01 biosynthesis of tryptophan	0.107359	1	0.90	AT3G57880	29	0.10	0.8
40.10.02.01 anti-apoptosis	0.11085	1	0.90	AT3G54420	30	0.10	0.8
20.01.11 amine / polyamine transport	0.121242	1	0.90	AT5G45380	33	0.11	0.79
34.07 cell adhesion	0.124679	1	0.90	AT1G03870	34	0.11	0.79
36.20.18.05 abscisic acid response	0.130927	2	1.80	AT2G46680 AT4G34710	161	0.56	1.24
40.01.03 directional cell growth (morphogenesis)	0.134879	2	1.80	AT1G12560 AT5G56320	164	0.57	1.23
01.20.33 metabolism of secondary products derived from L-tryptophan	0.138294	1	0.90	AT3G56400	38	0.13	0.77
20.03.02.02 symporter	0.141665	1	0.90	AT5G45380	39	0.13	0.77
70.02 eukaryotic plasma membrane / membrane attached	0.144447	4	3.60	AT1G03870 AT5G06320 AT5G20230 AT5G42010	517	1.81	1.79
16.17.01 calcium binding	0.14689	2	1.80	AT3G47480 AT5G39670	173	0.60	1.2
01.01 amino acid metabolism	0.150014	3	2.70	AT3G47340 AT3G57880 AT4G34710	342	1.20	1.5
30.01.09 second messenger mediated signal transduction	0.151855	3	2.70	AT2G34650 AT2G46680 AT3G15500	344	1.21	1.49
20.01.01.01 cation transport (H+, Na+, K+, Ca2+ , NH4+, etc.)	0.162108	3	2.70	AT1G01580 AT4G19690 AT5G20230	355	1.24	1.46
01.01.09.06 metabolism of tryptophan	0.164898	1	0.90	AT3G57880	46	0.16	0.74
01.20.35.01.03 metabolism of lignins	0.164898	1	0.90	AT3G19450	46	0.16	0.74
36.20.18.99 other plant signalling molecules response (jasmonic acid, salicylic acid etc.)	0.179874	2	1.80	AT3G56400 AT4G34710	197	0.69	1.11
10.01.09.05 DNA conformation modification (e.g. chromatin)	0.18934	6	5.40	AT1G80590 AT2G46400 AT2G46680 AT3G56400 AT5G49520 AT5G64810	987	3.47	1.93
01.01.03 assimilation of ammonia, metabolism of the glutamate group	0.200154	1	0.90	AT4G34710	57	0.20	0.7
11.02.03.04.03 transcription repression	0.200154	1	0.90	AT3G56400	57	0.20	0.7
20.03 transport facilities	0.207923	4	3.60	AT1G33110 AT2G25810 AT2G34390 AT5G45380	600	2.11	1.49
10.01.09 DNA restriction or modification	0.208627	6	5.40	AT1G80590 AT2G46400 AT2G46680 AT3G56400 AT5G49520 AT5G64810	1019	3.58	1.82
01.05.02.04 sugar, glucoside, polyol and carboxylate anabolism	0.209511	1	0.90	AT2G18700	60	0.21	0.69
20.09.16 cellular export and secretion	0.212606	1	0.90	AT4G12120	61	0.21	0.69
20.01.27 drug/toxin transport	0.221818	1	0.90	AT1G33110	64	0.22	0.68
42.10.03 organization of chromosome structure	0.226062	6	5.40	AT1G80590 AT2G46400 AT2G46680 AT3G56400 AT5G49520 AT5G64810	1047	3.68	1.72
42.10 nucleus	0.226694	6	5.40	AT1G80590 AT2G46400 AT2G46680 AT3G56400 AT5G49520 AT5G64810	1048	3.68	1.72
30.01.05.05.03 trimeric G-protein mediated signal transduction	0.2279	1	0.90	AT5G42010	66	0.23	0.67
40.10.02 apoptosis (type I programmed cell death)	0.230923	1	0.90	AT3G54420	67	0.23	0.67
01.02.03 sulfur metabolism	0.245865	1	0.90	AT4G04610	72	0.25	0.65
01.07 metabolism of vitamins, cofactors, and prosthetic groups	0.257039	2	1.80	AT1G74710 AT3G24503	251	0.88	0.92
16.19.05 GTP binding	0.275842	2	1.80	AT1G33900 AT5G42010	264	0.92	0.88
34.11.01 photoperception and response	0.277289	2	1.80	AT3G47340 AT5G20230	265	0.93	0.87
01 METABOLISM	0.281324	22	19.8	AT1G17420 AT1G74710 AT2G15490 AT2G18193 AT2G18700 AT2G34650 AT2G36690 AT3G09270 AT3G17790 AT3G19450 AT3G24503 AT3G43800 AT3G47340 AT3G50930 AT3G54420 AT3G56400 AT3G57880 AT3G60130 AT3G62260 AT4G04610 AT4G34710 AT5G26340	4932	17.3	2.5
01.01.06 metabolism of the aspartate family	0.286189	1	0.90	AT3G47340	86	0.30	0.6
30.05.01 receptor enzyme mediated signalling	0.306154	2	1.80	AT5G45080 AT5G45090	285	1.00	0.8
40.10 cell death	0.327023	1	0.90	AT3G54420	101	0.35	0.55
20.01.01.07 anion transport	0.329662	1	0.90	AT1G12940	102	0.35	0.55
20.01.03.01 sugar transport	0.347846	1	0.90	AT5G26340	109	0.38	0.52
11.02.03.04.01 transcription activation	0.360535	1	0.90	AT2G46680	114	0.40	0.5
30.05 transmembrane signal transduction	0.367336	2	1.80	AT5G45080 AT5G45090	328	1.15	0.65
30 CELLULAR COMMUNICATION/SIGNAL TRANSDUCTION MECHANISM	0.386196	6	5.40	AT2G34650 AT2G46680 AT3G15500 AT5G42010 AT5G45080 AT5G45090	1283	4.51	0.890000000000001
41 DEVELOPMENT (Systemic)	0.389126	5	4.50	AT1G11580 AT3G15500 AT3G49530 AT4G34710 AT5G18270	1047	3.68	0.82
01.07.01 biosynthesis of vitamins, cofactors, and prosthetic groups	0.392392	1	0.90	AT1G74710	127	0.44	0.46
20.01.03 C-compound and carbohydrate transport	0.397152	1	0.90	AT5G26340	129	0.45	0.45
01.01.09 metabolism of the cysteine - aromatic group	0.413521	1	0.90	AT3G57880	136	0.47	0.43
70.10.07 nucleolus	0.424942	1	0.90	AT2G46400	141	0.49	0.41
30.01.05.05 G-protein mediated signal transduction	0.431689	1	0.90	AT5G42010	144	0.50	0.4
10.01 DNA processing	0.433222	6	5.40	AT1G80590 AT2G46400 AT2G46680 AT3G56400 AT5G49520 AT5G64810	1350	4.75	0.65
18.01.01 regulation by modification	0.435737	2	1.80	AT2G34650 AT3G62260	378	1.33	0.47
30.01 cellular signalling	0.44376	4	3.60	AT2G34650 AT2G46680 AT3G15500 AT5G42010	871	3.06	0.54
11.02.03.04 transcriptional control	0.446612	9	8.10	AT1G80590 AT2G46400 AT2G46680 AT3G15500 AT3G49530 AT3G56400 AT5G18270 AT5G49520 AT5G64810	2117	7.45	0.649999999999999
20.01 transported compounds (substrates)	0.461464	8	7.20	AT1G01580 AT1G12940 AT1G33110 AT4G12120 AT4G19690 AT5G20230 AT5G26340 AT5G45380	1892	6.65	0.55
11.02.03 mRNA synthesis	0.464686	9	8.10	AT1G80590 AT2G46400 AT2G46680 AT3G15500 AT3G49530 AT3G56400 AT5G18270 AT5G49520 AT5G64810	2149	7.56	0.539999999999999
18.01 regulation by	0.469739	2	1.80	AT2G34650 AT3G62260	404	1.42	0.38
01.02 nitrogen, sulfur and selenium metabolism	0.470555	1	0.90	AT4G04610	162	0.57	0.33
20 CELLULAR TRANSPORT, TRANSPORT FACILITIES AND TRANSPORT ROUTES	0.474377	10	9.00	AT1G01580 AT1G12940 AT1G33110 AT2G25810 AT2G34390 AT4G12120 AT4G19690 AT5G20230 AT5G26340 AT5G45380	2419	8.51	0.49
20.03.02 carrier (electrochemical potential-driven transport)	0.478827	1	0.90	AT5G45380	166	0.58	0.32
14.04 protein targeting, sorting and translocation	0.498952	1	0.90	AT4G12120	176	0.61	0.29
41.03.08 fruit development and ripening	0.508724	1	0.90	AT1G11580	181	0.63	0.27
30.01.05.01.06 serine/threonine kinase	0.514496	1	0.90	AT2G34650	184	0.64	0.26
01.05.02.01 nucleotide-sugar metabolism	0.516405	1	0.90	AT2G15490	185	0.65	0.25
30.01.05 enzyme mediated signal transduction	0.522028	2	1.80	AT2G34650 AT5G42010	446	1.56	0.24
47.02.01 shoot	0.538742	1	0.90	AT4G34710	197	0.69	0.21
70 SUBCELLULAR LOCALIZATION	0.546887	41	36.9	AT1G03870 AT1G05240 AT1G07740 AT1G11580 AT1G12560 AT1G13340 AT1G17420 AT1G23720 AT1G52200 AT1G59590 AT1G61340 AT1G80110 AT1G80590 AT2G18700 AT2G35980 AT2G44370 AT2G46400 AT2G46680 AT3G09270 AT3G28550 AT3G29410 AT3G43800 AT3G50930 AT3G54580 AT3G56400 AT3G60130 AT3G62260 AT4G04610 AT4G12120 AT4G37520 AT5G06320 AT5G15890 AT5G20230 AT5G42010 AT5G45080 AT5G45110 AT5G49520 AT5G56320 AT5G57510 AT5G57625…	10531	37.0	-0.100000000000001
11.02 RNA synthesis	0.547097	9	8.10	AT1G80590 AT2G46400 AT2G46680 AT3G15500 AT3G49530 AT3G56400 AT5G18270 AT5G49520 AT5G64810	2298	8.08	0.0199999999999996
10 CELL CYCLE AND DNA PROCESSING	0.54751	6	5.40	AT1G80590 AT2G46400 AT2G46680 AT3G56400 AT5G49520 AT5G64810	1518	5.34	0.0600000000000005
32.01.03 osmotic and salt stress response	0.553062	1	0.90	AT4G34710	205	0.72	0.18
34.11.03.13 osmosensing and response	0.558317	1	0.90	AT4G34710	208	0.73	0.17
16.17 metal binding	0.575159	5	4.50	AT1G17420 AT3G47480 AT4G22010 AT5G20230 AT5G39670	1296	4.56	-0.0600000000000005
01.05.03 polysaccharide metabolism	0.607619	1	0.90	AT3G54420	238	0.83	0.0700000000000001
47.02 plant organ	0.622808	1	0.90	AT4G34710	248	0.87	0.03
01.05 C-compound and carbohydrate metabolism	0.62749	6	5.40	AT2G15490 AT2G18700 AT3G17790 AT3G24503 AT3G54420 AT3G60130	1646	5.79	-0.39
99 UNCLASSIFIED PROTEINS	0.637668	30	27.0	AT1G11540 AT1G12080 AT1G25400 AT1G27100 AT1G53130 AT1G69840 AT1G77330 AT2G03505 AT2G20142 AT2G20515 AT2G47140 AT2G47540 AT3G02240 AT3G11550 AT3G12050 AT3G19990 AT3G25882 AT3G60420 AT4G02270 AT4G25670 AT5G05440 AT5G05500 AT5G10130 AT5G40590 AT5G42785 AT5G45480 AT5G48180 AT5G48430 AT5G54370 AT5G58750	7994	28.1	-1.1
47 ORGAN DIFFERENTIATION	0.640269	1	0.90	AT4G34710	260	0.91	-0.01
01.05.02 sugar, glucoside, polyol and carboxylate metabolism	0.651575	3	2.70	AT2G15490 AT2G18700 AT3G60130	853	3.00	-0.3
30.01.05.01 protein kinase	0.667606	1	0.90	AT2G34650	280	0.98	-0.08
20.01.10 protein transport	0.684261	1	0.90	AT4G12120	293	1.03	-0.13
18.02 regulation of protein activity	0.685626	2	1.80	AT2G34650 AT3G62260	603	2.12	-0.32
18 REGULATION OF METABOLISM AND PROTEIN FUNCTION	0.690003	2	1.80	AT2G34650 AT3G62260	608	2.13	-0.33
11 TRANSCRIPTION	0.723881	9	8.10	AT1G80590 AT2G46400 AT2G46680 AT3G15500 AT3G49530 AT3G56400 AT5G18270 AT5G49520 AT5G64810	2664	9.37	-1.27
01.04 phosphate metabolism	0.742986	6	5.40	AT2G18193 AT2G34650 AT3G17790 AT3G50930 AT3G62260 AT5G26340	1863	6.55	-1.15
16.17.09 heavy metal binding (Cu, Fe, Zn)	0.743231	3	2.70	AT1G17420 AT4G22010 AT5G20230	983	3.45	-0.75
20.01.15 electron transport	0.773603	2	1.80	AT1G01580 AT5G20230	717	2.52	-0.72
70.03 cytoplasm	0.79114	3	2.70	AT3G09270 AT3G43800 AT4G37520	1066	3.75	-1.05
70.16 mitochondrion	0.798149	10	9.00	AT1G07740 AT1G13340 AT1G61340 AT1G80110 AT2G18700 AT2G44370 AT3G50930 AT3G60130 AT5G15890 AT5G57510	3146	11.0	-2
70.26.03 chloroplast	0.801348	11	9.90	AT1G17420 AT1G52200 AT1G59590 AT1G80590 AT2G35980 AT3G29410 AT3G62260 AT4G04610 AT4G12120 AT5G45080 AT5G45110	3439	12.1	-2.2
41.03.03 embryonal development	0.804548	1	0.90	AT4G34710	414	1.45	-0.55
70.26 plastid	0.808955	11	9.90	AT1G17420 AT1G52200 AT1G59590 AT1G80590 AT2G35980 AT3G29410 AT3G62260 AT4G04610 AT4G12120 AT5G45080 AT5G45110	3464	12.1	-2.2
20.09 transport routes	0.812161	1	0.90	AT4G12120	424	1.49	-0.59
16.03.03 RNA binding	0.825825	1	0.90	AT1G78260	443	1.55	-0.65
41.03 plant development	0.857306	2	1.80	AT1G11580 AT4G34710	869	3.05	-1.25
14.07.03 modification by phosphorylation, dephosphorylation, autophosphorylation	0.868982	3	2.70	AT2G34650 AT3G17790 AT3G62260	1243	4.37	-1.67
70.10 nucleus	0.870151	6	5.40	AT1G80590 AT2G46400 AT2G46680 AT3G56400 AT5G49520 AT5G64810	2207	7.76	-2.36
16.19 nucleotide/nucleoside/nucleobase binding	0.893383	4	3.60	AT1G33900 AT2G18193 AT3G50930 AT5G42010	1655	5.82	-2.22
16.19.03 ATP binding	0.95416	2	1.80	AT2G18193 AT3G50930	1218	4.28	-2.48
01.06 lipid, fatty acid and isoprenoid metabolism	0.962568	1	0.90	AT1G17420	827	2.91	-2.01
14.07 protein modification	0.992272	3	2.70	AT2G34650 AT3G17790 AT3G62260	2165	7.61	-4.91
14 PROTEIN FATE (folding, modification, destination)	0.998655	4	3.60	AT2G34650 AT3G17790 AT3G62260 AT4G12120	3104	10.9	-7.3
16.01 protein binding	0.999737	2	1.80	AT5G42010 AT5G45110	2619	9.21	-7.41
16.03 nucleic acid binding	0.999872	1	0.90	AT1G78260	2200	7.74	-6.84
16 PROTEIN WITH BINDING FUNCTION OR COFACTOR REQUIREMENT (structural or catalytic)	0.999979	11	9.90	AT1G17420 AT1G33900 AT1G78260 AT2G18193 AT3G47480 AT3G50930 AT4G22010 AT5G20230 AT5G39670 AT5G42010 AT5G45110	7027	24.7	-14.8

## Sheet: integration
Up or down	catma	At Id	Functional category or Name, description	2h.1	2h.2	6h.1	6h.2	30h.1	30h.2
			32 CELL RESCUE, DEFENSE AND VIRULENCE
			32.01 Stress response
+	CATMA1A16465	AT1G17420	Lipoxygenase 3 (chloroplastic) (present also in the 'secondary metabolism' category)	1.95	1.74	1.57	1.79	1.52	1.25	http://www.arabidopsis.org/servlets/TairObject?id=434296&type=gene
+	CATMA4A36503	AT4G34710	Arginine decarboxylase (ADC2), a rate-limiting enzyme that catalyzes the first step of polyamine (PA) biosynthesis via ADC pathway in Arabidopsis thaliana (Also present in the 'secondary metabolism' category)	1.41	1.63	1.99	2.28	3.2	3.66	http://www.arabidopsis.org/servlets/TairObject?id=131409&type=gene
			32.01.01 Oxidative stress response
+	CATMA5A04520	AT5G05340	Peroxidase, putative	1.6	1.63	2.51	1.93	2.62	1.96	http://www.arabidopsis.org/servlets/TairObject?id=133197&type=gene
+	CATMA1A12340	AT1G13340	Expressed protein (induced in response to oxidative stress)	1.47	0.66	1.98	1.95	2.59	2.25	http://www.arabidopsis.org/servlets/TairObject?id=431601&type=gene
-	CATMA5A59575	AT5G64100	Peroxidase, putative	-0.88	-1.15	-1.89	-2.79	-1.99	-2.4	http://www.arabidopsis.org/servlets/TairObject?id=134708&type=gene						Involved in response to oxidative stress and located in cell wall
-	CATMA1A29020	AT1G30870	Cationic peroxidase, putative	-1.2	-1.5	-2.06	-2.97	-3.24	-3.73	http://www.arabidopsis.org/servlets/TairObject?id=430986&type=gene						Involved in response to oxidative stress, endomembrane system
-	CATMA3A43010	AT3G49960	Peroxidase, putative	-1.41	-1.71	-2.11	-2	-3.81	-2.94	http://www.arabidopsis.org/servlets/TairObject?id=38478&type=gene						Involved in response to oxidative stress, endomembrane system
-	CATMA4A27640	AT4G26010	Peroxidase, putative	-1.62	-1.92	-3.03	-2.68	-4.19	-3.35	http://www.arabidopsis.org/servlets/TairObject?id=128727&type=gene						Involved in response to oxidative stress, endomembrane system
-	CATMA3A00185	AT3G01190	Peroxidase 27 (PER27) (P27) (PRXR7)	-1.68	-2.31	-2.57	-2.91	-3.5	-3.65	http://www.arabidopsis.org/servlets/TairObject?id=41789&type=gene						Involved in response to oxidative stress, endomembrane system
-	CATMA1A04090	AT1G05250	Peroxidase, putative	-2.16	-0.77	-3.06	-2.55	-6.43	-2.09
	CATMA1A04085			-2.25	-1.82	-2.96	-3.59	-5.46	-3.19	http://www.arabidopsis.org/servlets/TairObject?id=139324&type=gene						Involved in response to oxidative stress, endomembrane system
-	CATMA4A39085	AT4G37520	Peroxidase 50 (PER50) (P50) (PRXR2)	-2.28	-2.31	-1.41	-2.12	-3.16	-1.97	http://www.arabidopsis.org/servlets/TairObject?id=432340&type=gene						Involved in response to oxidative stress, cytoplasm
+	CATMA5A18670	AT5G20230	Arabidopsis blue-copper-binding protein (AtBCB), Al-stress-induced gene	3.41	2.36	2.68	2.14	2.84	1.58	http://www.arabidopsis.org/servlets/TairObject?id=132620&type=gene
			32.07 Detoxification
+	CATMA3A08130	AT3G09270	Glutathione S-transferase Tau8 (AtGSTU8) (also present in the 'secondary metabolism' category)	1.12	1	1.67	1.47	2.49	1.86	http://www.arabidopsis.org/servlets/TairObject?id=38561&type=gene
-	CATMA3A36640	AT3G43800	Glutathione S-transferase Tau27 (AtGSTU27) (present also in 'secondary metabolism' category)	-1.05	-0.61	-1.5	-1.26	-1.36	-1.31	http://www.arabidopsis.org/servlets/TairObject?id=41618&type=gene
			32.05 disease, virulence and defense
+	CATMA2A34180	AT2G35980	Encodes a protein whose sequence is similar to tobacco hairpin-induced gene (HIN1) and Arabidopsis non-race specific disease resistance gene (NDR1). Expression of this gene is induced by cucumber mosaic virus, spermine and during senescence. The gene product is localized to the chloroplast. YELLOW-LEAF-SPECIFIC GENE 9 (YSL9)	1.69	1.87	2	1.89	2.76	3.34	http://www.arabidopsis.org/servlets/TairObject?id=32674&type=gene
-	CATMA5A40930	AT5G45090	Phloem protein 2-A7 (AtPP2-A7)	-0.81	-1.24	-1.15	-1.4	-1.16	-1.34	http://www.arabidopsis.org/servlets/TairObject?id=133156&type=gene
-	CATMA5A40920	AT5G45080	Phloem protein 2-A6 (AtPP2-A6)	-2.15	-3.3	-2.17	-2.76	-3.41	-3.58	http://www.arabidopsis.org/servlets/TairObject?id=133155&type=gene
			34 INTERACTION WITH THE ENVIRONMENT
-	CATMA1A00560	AT1G01580	Encodes the low-iron-inducible ferric chelate reductase (FRO2) responsible for reduction of iron at the root surface. It is likely to be the major Fe(III) chelate reductase in Arabidopsis iron metabolism. Coordinately regulated with IRT1, the major transporter responsible for high-affinity iron uptake from the soil, at both transcriptional and posttranscriptional levels. Steady state mRNA levels …	-1.17	-1.83	-2.86	-3.83	-3.95	-4.89	http://www.arabidopsis.org/servlets/TairObject?id=30447&type=gene
-	CATMA1A02720	AT1G03870	Fasciclin-like arabinogalactan-protein (located in plasma membrane, anchored to plasma membrane)	-1.32	-0.9	-2.5	-2.94	-3.81	-3.49	http://www.arabidopsis.org/servlets/TairObject?id=30219&type=gene
			34.01 homeostasis
+	CATMA3A17300	AT3G17790	Purple acid phosphatase (PAP17) (AtACP5), involved in response to hydrogen peroxide, cellular phosphate ion homeostasis	0.72	0.65	0.66	0.55	1.65	1.12	http://www.arabidopsis.org/servlets/TairObject?id=39460&type=gene
	CATMA3A17290			0.75	0.78	1.57	1.54	4.1	3.47	http://www.arabidopsis.org/servlets/TairObject?id=39460&type=gene
			34.11 cellular sensing and response to external stimulus
+	CATMA2A32773	AT2G34650	Encodes a protein serine/threonine kinase that may act as a positive regulator of cellular auxin efflux, as a a binary switch for PIN polarity, and as a negative regulator of auxin signaling (PINOID, PID). Also in 30 CELLULAR COMMUNICATION/SIGNAL TRANSDUCTION MECHANISM	1.17	1.25	1.86	2.25	1.83	1.24	http://www.arabidopsis.org/servlets/TairObject?id=36286&type=gene
+	CATMA4A38960	AT4G37390	Auxin-responsive GH3 family protein. Encodes an IAA-amido synthase that conjugates Asp and other amino acids to auxin in vitro. Lines carrying insertions in this gene are hypersensitive to auxin. May function as a negative component in auxin signaling by regulating auxin activity	1.63	0.78	1.57	1.75	2.54	2.14	http://www.arabidopsis.org/servlets/TairObject?id=129543&type=gene
+	CATMA2A21670	AT2G23170	Auxin-responsive GH3 family protein, encodes an IAA-amido synthase that conjugates Asp and other amino acids to auxin in vitro	1.55	2.02	2.01	2.38	1.93	2.15	http://www.arabidopsis.org/servlets/TairObject?id=35683&type=gene
			34.11.10 response to biotic stimulus
+	CATMA5A05530	AT5G06320	Encodes a protein whose sequence is similar to tobacco hairpin-induced gene (HIN1) and Arabidopsis non-race specific disease resistance gene (NDR1). Expression of this gene is induced by cucumber mosaic virus, spermine and Pseudomonas syringae pv. tomato DC3000. The gene product is localized to the plasma membrane	2.52	1.13	3.01	2.21	2.84	2.14	http://www.arabidopsis.org/servlets/TairObject?id=134691&type=gene
-	CATMA1A32130	AT1G33900	Avirulence-responsive protein, putative	-0.96	-1.01	-1.91	-1.85	-2.36	-1.33	http://www.arabidopsis.org/servlets/TairObject?id=138855&type=gene
-	CATMA2A27080	AT2G28670	Disease resistance-responsive family protein (function unkown)	-1.29	-1.74	-1.92	-2.09	-2.82	-2.05	http://www.arabidopsis.org/servlets/TairObject?id=36796&type=gene
-	CATMA1A06800	AT1G07730	Disease resistance-responsive family protein	-0.84	-1.53	-1.45	-1.49	-2.29	-2.12	http://www.arabidopsis.org/servlets/TairObject?id=1000643997&type=gene
			70.01 or 42.01 Cell wall
-	CATMA5A37730	AT5G42010	WD-40 repeat family protein	-1.29	-2.05	-1.17	-1.21	-1.17	-1.33	http://www.arabidopsis.org/servlets/TairObject?id=134876&type=gene
-	CATMA3A47520	AT3G54580	Proline-rich extensin-like family protein (involved in plant-type cell wall organization)	-0.73	-1.6	-2.41	-2.64	-4.26	-3.87	http://www.arabidopsis.org/servlets/TairObject?id=40896&type=gene
-	CATMA5A08890	AT5G10130	Pollen Ole e 1 allergen?, extensin family protein, function unknown; located in extracellular space, endomembrane system	-0.83	-0.61	-2.28	-1.53	-3.32	-1.82	http://www.arabidopsis.org/servlets/TairObject?id=137349&type=gene
-	CATMA1A11550	AT1G12560	Member of Alpha-Expansin Gene Family (AtEXP7). Naming convention from the Expansin Working Group (Kende et al, 2004. Plant Mol Bio). Containing a conserved root hair-specific cis-element RHE. Expressed specifically in root hair cell. Located in extracellular region, endomembrane system	-0.92	-0.69	-1.62	-2.48	-2.11	-2.06	http://www.arabidopsis.org/servlets/TairObject?id=431224&type=gene
-	CATMA4A02540	AT4G02270	Pollen Ole e 1 allergen?, extensin family protein	-0.93	-1.88	-2.54	-3.98	-4.65	-4.55	http://www.arabidopsis.org/servlets/TairObject?id=131187&type=gene
-	CATMA1A22610	AT1G23720	Proline-rich extensin-like family protein, functions in structural constituent of cell wall; involved in plant-type cell wall organization	-0.95	-1.65	-2.63	-3.25	-3.34	-3.81	http://www.arabidopsis.org/servlets/TairObject?id=31987&type=gene
-	CATMA5A52120	AT5G56320	Member of Alpha-Expansin Gene Family (AtEXPA14), located in extracellular region, endomembrane system	-1.07	-1.05	-1.94	-1.65	-2.53	-2.09	http://www.arabidopsis.org/servlets/TairObject?id=134237&type=gene
-	CATMA3A28430	AT3G28550	Proline-rich extensin-like family protein (involved in plant-type cell wall organization)	-1.21	-1.36	-2.03	-2.68	-3.46	-3.44	http://www.arabidopsis.org/servlets/TairObject?id=40651&type=gene
-	CATMA2A46000	AT2G47540	Extensin family protein	-1.34	-1.36	-2.34	-3.59	-2.45	-3.2	http://www.arabidopsis.org/servlets/TairObject?id=36249&type=gene
-	CATMA5A04670	AT5G05500	Pollen Ole e 1 allergen?, extensin family protein	-2.05	-1.77	-3.77	-4.16	-4.68	-3.1	http://www.arabidopsis.org/servlets/TairObject?id=432962&type=gene
-	CATMA1A10550	AT1G11580	Methylesterase PCR A (PMEPCRA), functions in: enzyme inhibitor activity, pectinesterase activity; involved in cell wall modification; located in cell wall, plasma membrane	-2.02	-2.45	-1.46	-1.27	-2.23	-1.43	http://www.arabidopsis.org/servlets/TairObject?id=138382&type=gene
			36 SYSTEMIC INTERACTION WITH THE ENVIRONMENT
			36.20.16.05 Systemic acquired resistance
+	CATMA1A64075	AT1G74710	Isochorismate synthase 1 (ICS1). Mutants fail to accumulate salicylic acid. Its function may be redundant with that of ICS2 (AT1G18870). Involved in SA-mediated defense response. Also present also in the 'secondary metabolism' category.	1.38	0.87	3.57	3.46	5	4.42	http://www.arabidopsis.org/servlets/TairObject?id=434184&type=gene
			14 PROTEIN FATE (folding, modification, destination)
+	CATMA3A25700	AT3G25882	Encodes a kinase that physically interacts with NPR1/NIM1 (NPR1/NIM1-interacting protein 2)	1.67	1.22	1.69	2.34	3.21	2.46	http://www.arabidopsis.org/servlets/TairObject?id=500439935&type=gene
+	CATMA4A38530	AT4G36950	Member of MEKK subfamily, involved in protein amino acid phosphorylation (MAPKKK21)	1.53	1.72	1.63	2.02	1.44	1.69	http://www.arabidopsis.org/servlets/TairObject?id=127923&type=gene
	CATMA4A38520			1.31	0.9	0.86	0.35	-0.09	0.11	http://www.arabidopsis.org/servlets/TairObject?id=127923&type=gene
+	CATMA3A55410	AT3G62260	Protein phosphatase 2C, putative (PP2C)	1.36	1.17	1.98	2.08	2.95	2.74	http://www.arabidopsis.org/servlets/TairObject?id=41087&type=gene
+	CATMA4A12240	AT4G12120	Member of KEULE Gene Family, involved in vesicle docking during exocytosis, in vesicle-mediated transport	1.1	0.91	1.62	1.27	1.24	1.24	http://www.arabidopsis.org/servlets/TairObject?id=128372&type=gene
			70 SUBCELLULAR LOCALIZATION
+	CATMA1A50390	AT1G61340	F-box family protein (mitochondrion)	2.14	1.08	1.76	1.93	1.82	1.42	http://www.arabidopsis.org/servlets/TairObject?id=138013&type=gene
+	CATMA5A53230	AT5G57510	Unknown protein (mitochondrion)	1.63	1.08	1.6	1.75	2.26	1.84	http://www.arabidopsis.org/servlets/TairObject?id=136057&type=gene
+	CATMA1A48650	AT1G59590	Expressed protein (plastid)	1.28	0.68	2.22	2.5	2.36	2.07	http://www.arabidopsis.org/servlets/TairObject?id=138773&type=gene
-	CATMA2A42780	AT2G44370	DC1 domain-containing protein (mitochondrion)	-0.62	-0.97	-1.65	-1.97	-1.68	-2.46	http://www.arabidopsis.org/servlets/TairObject?id=34396&type=gene
-	CATMA1A06800	AT1G07740	Pentatricopeptide (PPR) repeat-containing protein (mitochondrion)	-0.84	-1.53	-1.45	-1.49	-2.29	-2.12
-	CATMA5A14160	AT5G15890	Expressed protein (mitochondrion)	-1.12	-0.9	-1.6	-1.55	-2.3	-1.7	http://www.arabidopsis.org/servlets/TairObject?id=132196&type=gene
-	CATMA1A43271	AT1G52200	Expressed protein (plastid)	-1.53	-1.61	-1.71	-2.1	-1.54	-1.8	http://www.arabidopsis.org/servlets/TairObject?id=32430&type=gene
			70.27 Extracellular / secretion proteins
-	CATMA5A53330	AT5G57625	Allergen V5/Tpx-1-related family protein, function unkown, located in: extracellular region, endomembrane system	-1.42	-1.44	-2.69	-3.49	-4.66	-2.79	http://www.arabidopsis.org/servlets/TairObject?id=500439051&type=gene
			20 CELLULAR TRANSPORT, TRANSPORT FACILITIES AND TRANSPORT ROUTES
+	CATMA5A24040	AT5G26340	Encodes a protein with high affinity, hexose-specific/H+ symporter activity (sugar transport protein 13). The activity of the transporter appears to be negatively regulated by phosphorylation. Importantly, microarray analysis, as well as the study of the expression of this gene in mutants involved in programmed cell death (PCD) demonstrated a tight correlation between this gene's expression and P…	1.14	1.26	1.51	2.17	2.59	2.33	http://www.arabidopsis.org/servlets/TairObject?id=132881&type=gene					http://www.sciencedirect.com/science?_ob=ArticleURL&_udi=B6T36-4JKRVXV-3&_user=1480218&_coverDate=04%2F17%2F2006&_rdoc=1&_fmt=high&_orig=search&_sort=d&_docanchor=&view=c&_acct=C000053039&_version=1&_urlVersion=0&_userid=1480218&md5=bf2012cfbda15da11decc54a4ee20815	Norholm et al (2006) FEBS Lett
+	CATMA1A31460	AT1G33110	MATE efflux family protein, involved in multidrug transport, has antiporter activity and drug transmembrane transporter activity	0.84	0.91	1.47	1.89	2.08	2.38	http://www.arabidopsis.org/servlets/TairObject?id=139287&type=gene
-	CATMA4A20925	AT4G19690	Iron-responsive transporter (IRT1)	-0.77	-1.37	-2.29	-2.16	-3.1	-3.11	http://www.arabidopsis.org/servlets/TairObject?id=130681&type=gene
-	CATMA2A32530	AT2G34390	Aquaporin NIP2.1 (NOD26-Like intrinsic protein 2;1). the data of Choi et al (2007) suggest that AtNIP2;1 is anaerobic-induced gene that encodes a lactic acid transporter, and may play a role in adaptation to lactic fermentation under anaerobic stress.	0.02	-0.07	0.05	-0.41	-0.31	-0.12	http://www.arabidopsis.org/servlets/TairObject?id=434655&type=gene
	CATMA2A32540			-0.96	-3.35	-2.67	-3.88	-3.65	-4.67	http://www.arabidopsis.org/servlets/TairObject?id=434655&type=gene	http://www.ncbi.nlm.nih.gov/pubmed/17584741?dopt=Abstract
-	CATMA5A41330	AT5G45380	Sodium:solute symporter family protein (urea transmembrane transporter activity) (AtDUR3). Localized in plasma membrane.	-1.41	-1.78	-2.15	-2.15	-4.28	-4.59	http://www.arabidopsis.org/servlets/TairObject?id=134588&type=gene	http://www.ncbi.nlm.nih.gov/pubmed/17672841?dopt=Abstract
-	CATMA2A24210	AT2G25810	Tonoplast intrinsic protein (TIP 4;1)	-1.47	-1.04	-2.83	-2.45	-3.3	-2.68	http://www.arabidopsis.org/servlets/TairObject?id=33412&type=gene
-	CATMA1A11930	AT1G12940	Member of high-affinity nitrate transporter (AtNRT2.5); Expression of AtNRT2.5, one of the nitrate-repressible genes, was strongly suppressed by nitrate provision in both roots and shoots (Okamoto et al, 2003), located in plasma membrane and phosphorylated (Benshop et al, 2007)	-2.4	-2.65	-3.3	-3.16	-4.83	-4.41	http://www.arabidopsis.org/servlets/TairObject?id=28548&type=gene	http://pcp.oxfordjournals.org.gate1.inist.fr/cgi/reprint/44/3/304					http://www.mcponline.org/content/6/7/1198.full.pdf+html
			01 METABOLISM
+	CATMA3A43940	AT3G50930	Cytochrome BC1 synthesis (BCS1); AAA-type ATPase family protein (mitochondrial)	2.44	1.93	2.42	3.18	2.41	1.78	http://www.arabidopsis.org/servlets/TairObject?id=37606&type=gene
+	CATMA3A40350	AT3G47340	Glutamine-dependent asparagine synthetase (ASN1)	1.82	1.48	2.14	2.36	2.71	1.53	http://www.arabidopsis.org/servlets/TairObject?id=41365&type=gene
+	CATMA3A53140	AT3G60130	BETA Glucosidase (BGLU16)	1.62	1.92	2.51	2.49	3.01	2.71	http://www.arabidopsis.org/servlets/TairObject?id=41668&type=gene
+	CATMA5A44160	AT5G48180	Encodes a nitrile-specifier protein NSP5. NSP5 is one out of five (At3g16400/NSP1, At2g33070/NSP2, At3g16390/NSP3, At3g16410/NSP4 and At5g48180/NSP5) A. thaliana epithiospecifier protein (ESP) homologues that promote simple nitrile, but not epithionitrile or thiocyanate formation (glucosinolate degradation)	1.16	1.06	2.08	1.62	3.12	2.82	http://www.arabidopsis.org/servlets/TairObject?id=134746&type=gene
+	CATMA2A14420	AT2G15490	UDP-glucosyl transferase 73B4 (UGT73B4); functions in quercetin 3-O-glucosyltransferase activity, quercetin 7-O-glucosyltransferase activity (last step in the anthocyanin …). The At5g17050 encodes a anthocyanidin 3-O-glucosyltransferase which specifically glucosylates the 3-position of the flavonoid C-ring. Anthocyanidins such as cyanidin and pelargonidin as well as flavonols such as kaempferol a…	1.05	0.96	1.24	1.55	1.74	2.11	http://www.arabidopsis.org/servlets/TairObject?id=34899&type=gene		http://www3.interscience.wiley.com/cgi-bin/fulltext/118705381/PDFSTART
+	CATMA3A50890	AT3G57880	C2 domain-containing protein (related to tryptophan biosynthetic process)	1	0.78	1.88	2.12	1.54	1.69	http://www.arabidopsis.org/servlets/TairObject?id=40724&type=gene
+	CATMA2A17350	AT2G18700	Encodes an enzyme putatively involved in trehalose biosynthesis. The protein has a trehalose synthase (TPS)-like domain that may or may not be active as well as a trehalose phosphatase (TPP)-like domain.	0.77	1.31	1.45	1.93	2.95	2.59	http://www.arabidopsis.org/servlets/TairObject?id=34957&type=gene
-	CATMA3A24400	AT3G24503	Aldehyde dehydrogenase (ALDH1a), a sinapaldehyde dehydrogenase that catalyzes both the oxidation of coniferylaldehyde and sinapaldehyde forming ferulic acid and sinapic acid, respectively	-0.66	-0.73	-0.39	-0.88	-2.36	-1.83
	CATMA3A24410			-2.49	-2.64	-1.5	-1.62	-4.34	-2.36	http://www.arabidopsis.org/servlets/TairObject?id=435311&type=gene
-	CATMA2A02430	AT2G03505	Glycosyl hydrolase family protein 17	-0.89	-0.85	-1.12	-1.31	-1.89	-1.66	http://www.arabidopsis.org/servlets/TairObject?id=500440120&type=gene
-	CATMA3A19045	AT3G19450	Cinnamyl-alcohol dehydrogenase (CAD-C), which uses p-coumaryl aldehyde as a preferred substrate. It can also use caffeyl, coniferyl and d-hydroxyconiferyl aldehydes as substrates. Also present in the 'secondary metabolism' category.	-0.91	-0.81	-1.49	-1.86	-2.8	-2.42	http://www.arabidopsis.org/servlets/TairObject?id=39836&type=gene
-	CATMA3A29610	AT3G29410	Terpene synthase/cyclase family protein (magnesium ion binding)	-1.02	-0.88	-1.74	-2.39	-2.2	-2.97	http://www.arabidopsis.org/servlets/TairObject?id=40391&type=gene
-	CATMA2B34910	AT2G36690	Oxidoreductase, 2OG-Fe(II) oxygenase family protein	-2.12	-2.51	-1.91	-2.26	-0.98	-1.52
	CATMA2A34910			-2.31	-1.87	-3.16	-3.05	-1.87	-2.48	http://www.arabidopsis.org/servlets/TairObject?id=32911&type=gene
-	CATMA4A05135	AT4G04610	5'-adenylylsulfate reductase (APR1)	-2.31	-3.52	-1.33	-1.42	-2.87	-1.82	http://www.arabidopsis.org/servlets/TairObject?id=129474&type=gene
-	CATMA3A47350	AT3G54420	Class IV chitinase (CHIV), encodes an EP3 chitinase that is expressed during somatic embryogenesis in 'nursing' cells surrounding the embryos but not in embryos themselves. The gene is also expressed in mature pollen and growing pollen tubes until they enter the receptive synergid, but not in endosperm and integuments as in carrot. Post-embryonically, expression is found in hydathodes, stipules, …	-1.26	-1.72	-1.21	-1.3	-2.12	-2.23	http://www.arabidopsis.org/servlets/TairObject?id=435353&type=gene
+	CATMA2A16860	AT2G18193	AAA-type ATPase family protein	1.85	2.25	2.27	3.14	2.21	2.22	http://www.arabidopsis.org/servlets/TairObject?id=1000639784&type=gene
			11 TRANSCRIPTION
			11.02.03.04 Transcriptional control
+	CATMA2A44770	AT2G46400	Member of WRKY Transcription Factor; Group III (WRKY46)	2.72	1.65	2.78	3.01	2.9	2.65	http://www.arabidopsis.org/servlets/TairObject?id=32663&type=gene
+	CATMA3A49380	AT3G56400	Member of WRKY Transcription Factor; Group III (WRKY70). Function as activator of SA-dependent defense genes and a repressor of JA-regulated genes. WRKY70-controlled suppression of JA-signaling is partly executed by NPR1. Also present in the 'secondary metabolism' category.	2.24	1.57	2.4	2.93	2.97	2.6	http://www.arabidopsis.org/servlets/TairObject?id=41862&type=gene
+	CATMA5A40970	AT5G45110	Encodes a paralog of NPR1 (NPR3), receptor for the immune signal salicylic acid. Involved in negative regulation of defense responses against bacterial and oomycete pathogens. npr3 mutants has elevated level of PR1 expression. Interacts with TGA2, TGA3, TGA5 and TGA6 in yeast two hybrid assays.	2	0.95	2.54	1.83	1.73	1.49	http://www.arabidopsis.org/servlets/TairObject?id=133150&type=gene
+	CATMA5A60235	AT5G64810	Member of WRKY Transcription Factor; Group II-c (WRKY51)	1.94	1.67	2.05	2.45	2.99	2.53	http://www.arabidopsis.org/servlets/TairObject?id=136482&type=gene
+	CATMA1A69790	AT1G80590	Member of WRKY Transcription Factor; Group III (WRKY66)	1.76	1.32	2.48	2.72	3.12	2.71	http://www.arabidopsis.org/servlets/TairObject?id=434394&type=gene
+	CATMA3A42560	AT3G49530	Transcription factor that serves as a molecular link between cold signals and pathogen resistance responses	1.75	1.25	1.86	1.36	1.95	1.37	http://www.arabidopsis.org/servlets/TairObject?id=127878&type=gene
+	CATMA2A45105	AT2G46680	Homeobox-leucine zipper protein 7 (HB-7)	1.62	1.92	2.24	2.46	3.58	3.94	http://www.arabidopsis.org/servlets/TairObject?id=36368&type=gene
+	CATMA5A45500	AT5G49520	Member of the WRKY Transcription Factor (WRKY48). WRKY48 is a stress- and pathogen-induced transcriptional activator that represses plant basal defense.	1.61	1.35	1.39	1.51	1.76	1.24	http://www.arabidopsis.org/servlets/TairObject?id=133780&type=gene
+	CATMA5A16550	AT5G18270	ANAC087, transcription factor activity	1.46	0.79	1.5	1.53	2.57	2.35	http://www.arabidopsis.org/servlets/TairObject?id=135741&type=gene
+	CATMA3A14910	AT3G15500	Encodes an ATAF-like NAC-domain transcription factor that doesn't contain C-terminal sequences shared by CUC1, CUC2 and NAM. Note: this protein (AtNAC3) is not to be confused with the protein encoded by locus AT3G29035, which, on occasion, has also been referred to as AtNAC3. (also in 32 CELL RESCUE, DEFENSE AND VIRULENCE & 30.01.09.08 hormone mediated signal transduction)	0.9	1.48	1.56	2.08	3.63	3.05	http://www.arabidopsis.org/servlets/TairObject?id=39741&type=gene
			16 PROTEIN WITH BINDING FUNCTION OR COFACTOR REQUIREMENT (structural or catalytic)
+	CATMA3A40490	AT3G47480	Calcium-binding EF hand family protein	1.72	0.75	2.3	1.97	2.4	1.9	http://www.arabidopsis.org/servlets/TairObject?id=37784&type=gene
+	CATMA5A35240	AT5G39670	Calcium-binding EF hand family protein	1.69	0.98	1.94	1.57	2.63	2.01	http://www.arabidopsis.org/servlets/TairObject?id=134766&type=gene
-	CATMA1A67370	AT1G78260	RNA recognition motif (RRM)-containing protein	-1.16	-0.88	-1.52	-2.07	-3.24	-2.15	http://www.arabidopsis.org/servlets/TairObject?id=31544&type=gene
-	CATMA4A23690	AT4G22010	SKU5 Similar 4 (sks4), functions in: oxidoreductase activity, copper ion binding	-1.25	-1.69	-1.32	-1.14	-2.92	-2.12	http://www.arabidopsis.org/servlets/TairObject?id=128714&type=gene
			Unclassified proteins
+	CATMA3A53430	AT3G60420	Phosphoglycerate mutase family protein	1.77	0.87	1.85	1.81	4.08	2.58	http://www.arabidopsis.org/servlets/TairObject?id=42001&type=gene
+	CATMA1A24060	AT1G25400	unknown protein	1.76	1.26	1.48	1.33	2.91	1.96	http://www.arabidopsis.org/servlets/TairObject?id=31398&type=gene
+	CATMA3A19600	AT3G19990	unknown protein	1.09	1.12	1.34	1.53	2.36	1.49	http://www.arabidopsis.org/servlets/TairObject?id=40632&type=gene
+	CATMA4A27360	AT4G25670	unknown protein	1.03	1.08	1.17	1.33	2.07	1.9	http://www.arabidopsis.org/servlets/TairObject?id=130313&type=gene
+	CATMA1A25320	AT1G27100	Actine cross-linking protein	0.92	0.88	1.14	1.22	1.76	1.49	http://www.arabidopsis.org/servlets/TairObject?id=139130&type=gene
	CATMA1A25330			-0.36	NA	0.35	-0.11	0	0.11	http://www.arabidopsis.org/servlets/TairObject?id=139130&type=gene
-	CATMA3A10500	AT3G11550	Uncharacterised protein family (UPF0497)	-0.88	-1.03	-2.68	-2.55	-2.86	-2.05	http://www.arabidopsis.org/servlets/TairObject?id=38053&type=gene
-	CATMA2A19010	AT2G20515	unknown protein	-0.9	-0.7	-1.86	-1.49	-2.2	-1.56	http://www.arabidopsis.org/servlets/TairObject?id=434834&type=gene
-	CATMA5A04600	AT5G05440	Encodes a member of the PYR (pyrabactin resistance )/PYL(PYR1-like)/RCAR (regulatory components of ABA receptor) family proteins with 14 members. PYR/PYL/RCAR family proteins function as abscisic acid sensors. Mediate ABA-dependent regulation of protein phosphatase 2Cs ABI1 and ABI2	-0.97	-1.27	-1.22	-1.33	-1.79	-1.51	http://www.arabidopsis.org/servlets/TairObject?id=133201&type=gene
-	CATMA1A11132	AT1G12080	Vacuolar calcium-binding protein-related	-1.02	-1.25	-1.69	-1.6	-2.81	-1.78	http://www.arabidopsis.org/servlets/TairObject?id=431445&type=gene
-	CATMA5A38600	AT5G42785	unknown protein	-1.21	-1.09	-1.95	-2.12	-2.32	-2.08	http://www.arabidopsis.org/servlets/TairObject?id=500439109&type=gene
-	CATMA3A01220	AT3G02240	Encodes a root meristem growth factor (RGF). Belongs to a family of functionally redundant homologous peptides that are secreted, tyrosine-sulfated, and expressed mainly in the stem cell area and the innermost layer of central columella cells. RGFs are required for maintenance of the root stem cell niche and transit amplifying cell proliferation	-1.22	-1	-1.9	-1.62	-1.45	-1.38	http://www.arabidopsis.org/servlets/TairObject?id=37343&type=gene
-	CATMA5A36240	AT5G40590	DC1 domain-containing protein	-1.25	-1.46	-1.85	-1.97	-2.22	-2.59	http://www.arabidopsis.org/servlets/TairObject?id=135253&type=gene
-	CATMA5A41420	AT5G45480	Protein of unknown function (DUF594)	-2.08	-2.36	-1.12	-1.22	-3.19	-2.11	http://www.arabidopsis.org/servlets/TairObject?id=134594&type=gene
-	CATMA1A10500	AT1G11540	Sulfite exporter TauE/SafE family protein	-2.1	-2.52	-1.95	-2.25	-2.93	-2.27	http://www.arabidopsis.org/servlets/TairObject?id=138379&type=gene
-	CATMA2A45590	AT2G47140	NAD(P)-binding Rossmann-fold superfamily protein; FUNCTIONS IN: oxidoreductase activity, binding, catalytic activity	-1.41	-1.28	-2.1	-1.51	-2.82	-1.79	http://www.arabidopsis.org/servlets/TairObject?id=33055&type=gene
-	CATMA1A66550	AT1G77330	Similar to 1-aminocyclopropane-1-carboxylate oxidase GI:3386565 from (Sorghum bicolor)	-2.02	-1.89	-1.34	-1.49	-2.97	-1.75	http://www.arabidopsis.org/servlets/TairObject?id=31435&type=gene
-	CATMA5A54470	AT5G58750	NAD(P)-binding Rossmann-fold superfamily protein; BEST Arabidopsis thaliana protein match is: NAD(P)-binding Rossmann-fold superfamily protein (TAIR:AT4G24220.2)	-0.89	-1.28	-1.17	-1.36	-1.38	-1.63	http://www.arabidopsis.org/servlets/TairObject?id=136633&type=gene
-	CATMA1A44160	AT1G53130	Encodes GRIM REAPER (GRI), involved in the regulation of cell death induced by extracellular ROS (reactive oxygen species). Secreted into the extracellular space.	-1.27	-0.92	-2.05	-1.98	-2.21	-1.61	http://www.arabidopsis.org/servlets/TairObject?id=32367&type=gene
-	CATMA3A10960	AT3G12050	Aha1 domain-containing protein (functions in ATPase activator activity, chaperone binding; involved in response to stress)	-1.16	-0.72	-2.36	-2.33	-3.37	-2.38	http://www.arabidopsis.org/servlets/TairObject?id=435281&type=gene
+	CATMA2A18610	AT2G20142	Toll-Interleukin-Resistance (TIR) domain family protein; FUNCTIONS IN: transmembrane receptor activity; INVOLVED IN: signal transduction, innate immune response; LOCATED IN: intrinsic to membrane	1.47	1.4	1.54	1.64	2	1.93	http://www.arabidopsis.org/servlets/TairObject?id=1000642620&type=gene
+	CATMA1A59160	AT1G69840	Band 7 family protein	1.85	1.42	1.91	1.75	1.75	1.39	http://www.arabidopsis.org/servlets/TairObject?id=137888&type=gene
+	CATMA1A69290	AT1G80110	Arabidopsis thaliana phloem protein 2-B11 (AtPP2-B11)	1.19	1.21	2.85	2.74	3.48	4.05	http://www.arabidopsis.org/servlets/TairObject?id=29518&type=gene
-	CATMA5A50230	AT5G54370	Late embryogenesis abundant protein-related	-0.96	-0.87	-2.09	-2.54	-3.77	-2.78	http://www.arabidopsis.org/servlets/TairObject?id=134468&type=gene
-	CATMA5A44410	AT5G48430	Aspartic-type endopeptidase	-3.37	-3.03	-3.3	-4.42	-4.2	-2.63	http://www.arabidopsis.org/servlets/TairObject?id=134917&type=gene
