# Supplementary material for: Uranium perturbs signaling and iron uptake response in Arabidopsis thaliana roots
Source: Royal Society of Chemistry journal article supplement (doi:10.1039/c4mt00005f), 2014-01-01
Supplement: c4mt00005f6.xlsx [file c4mt00005f6.xlsx]

## Sheet: Feuil1
		Supplemental Table 3. Selection of differentially expressed genes under 50 µM uranyle nitrate treatment at the 3 time points of analysis.
		Gene name	Accession no.	2h	6h	30h
		IRON HOMEOSTASIS RELATED GENES
		Iron Regulated Transporter 1 (IRT1)	At4g19690	-1.09	-2.2	-3.14
		Ferric Reductase Oxidase 2 (FRO2)	At1g01580	-1.53	-3.32	-4.5
		Plasma Membrane Proton ATPase 2 (AHA2)	At4g30190	-0.9	-0.78	-1.63
		Plasma Membrane Proton ATPase 7 (AHA7)	At3g60330	0.01	-0.94	-1.72
		Fe-Deficiency Induced Transcription Factor 1 (FIT1)	At2g28160	-1.53	-1.77	-2.2
		Natural Resistance-Associated Macrophage Protein 1 (NRAMP1)	At1g80830	-0.89	-1.21	-2.25
		ZRT, IRT-like Protein 3 (ZIP3)	At2g32270	-1.3	-0.57	-2
		ZRT, IRT-like Protein 8 (ZIP8)	At5g45105	-0.22	-0.71	-0.83
		Iron Regulated 1 (IREG1)	At2g38460	-0.21	-0.27	-1.06
		Iron Regulated 2 (IREG2)	At5g03570	-0.25	-0.65	-1.17
		Ferric Reductase Defective 3 (FRD3)	At3g08040	0.23	0	-0.94
		Iron Regulated Transporter 3 (IRT3)	At1g60960	0.37	-0.04	1.15
		Bush-and-Chlorotic-Dwarf 1 (BCD1)	At1g58340	0.62	1.43	4.84
		Ferric Reductase Oxidase 8 (FRO8)	At5g50160	-0.1	0.65	0.9
		Ferritin 3 (FER3)	At3g56090	-0.96	-0.8	-1.48
		Brutus (BTS)	At3g18290	0.22	0.93	-0.01
		PHOSPHATE HOMEOSTASIS RELATED GENES
		Purple Acid Phosphatase 17 (PAP17)	At3g17790	0.86	1.55	3.69
		Purple Acid Phosphatase 21 (PAP21)	At3g52810	0.02	0.5	1.45
		Purple Acid Phosphatase 22 (PAP22)	At3g52820	0.63	1.11	3.46
		Pyrophosphate-specific Phosphatase 1 (PPsPase1)	At1g73010	1.53	1.47	2.35
		Phosphoethanolamine / Phosphocholine Phosphatase 1 (PECP1)	At1g17710	0.02	0.19	2.97
		Phosphate Transporter 1;4 (PHT1;4)	At2g38940	-0.78	-1.09	-0.35
		Phosphate Transporter 3;1 (PHT3;1)	At5g14040	-1.36	-0.6	-1.22
		Phosphate Deficiency Response 2 (PDR2)	At5g23630	-0.88	0.26	-1.16
		Phosphate Starvation Response 1 (PHR1)	At4g28610	-1.08	-0.55	-1
		Ubiquitin-conjugating Enzyme 24 (PHO2)	At2g33770	-1.48	-0.08	-1.94
		Glycerophosphodiester Phosphodiesterase (GDPD1)	At3g02040	0.36	0.38	0.89
		Induced by Pi Starvation 2 (At4)	At5g03545	0.04	-0.31	1.52
		SPX Domain gene 1 (SPX1)	At5g20150	0.34	0.44	2.03
		WRKY DNA-binding Protein 75 (WRKY75)	At5g13080	0.6	1.22	2.5
		SUMO E3 Ligase (SIZ1)	At5g60410	-0.53	0.27	-0.96
		Basic Helix-Loop-Helix 32 (BHLH32)	At3g25710	0.44	0.72	0.97
		Scarecrow (SCR)	At3g46600	-0.89	0.08	-0.59
		Values at 2, 6 or 30 h of U exposition are log2 Ratio U-treated/control. Bold ratios were found to be statistically significant with a P-value < 0.05) and bold and underlined ratios were found to be statistically significant after Benjamini-Hochberg correction (P-value < 0.001).
