# Supplementary material for: Uranium perturbs signaling and iron uptake response in Arabidopsis thaliana roots
Source: Royal Society of Chemistry journal article supplement (doi:10.1039/c4mt00005f), 2014-01-01
Supplement: c4mt00005f7.xlsx [file c4mt00005f7.xlsx]

## Sheet: Feuil1
Supplementary Table 4
Experiment name in CATdb	Pubmed Identifier	Experimental setup	# Edges	Organs	#dye-swaps	Description of the experiment
RS05-08_NO_exp80	19168643	Abiotic stress	52	roots	4	Transcriptionnal impact of Cd-induced nitric oxide synthesis.
AF31_HAF2_GCN5_exp20	NA	Mutant	45	seedling	6	Histone acetylation required for gene expression during germination
CEA06-01_Uranyl_nitrate_exp150	NA	Abiotic stress, time course	40	roots, leaves	20	Dynamic analyses of transcriptomic response to urany l nitrate
AF51_ATM	17487278	Abiotic stress	32	roots, whole plant	16	A functional study of genes that might play a role in DNA repair/recombination and in the response to oxidative stress (Microarrays expression studies, Microbiological assays, In planta functional studies)
AU05-01_P25_exp70	20602166	Biotic stress	26	roots	6	Characterization of genes differentially expressed in roots of transgenic arabidopsis lines expressing the p25 protein of beet necrotic yellow vein virus.
GNP3_TRI33-Arabidoseed_exp165	NA	Development	21	seedling	106	Establishing the network of seed gene expression and analysis of its biodiversity
AF01_Cul3a2_Cul3b_exp19	NA	Mutant	20	seedling	4	Study of the function of SCF complexes in Arabidopsis.
RA03-05_Clubroot_exp51	NA	Biotic stress	18	roots, whole plant	14	Deciphering the Arabidopsis mechanisms of resistance to clubroot (Plasmodiophora brassicae) by differential analysis of transcriptome.
AU07-02_TRV_exp216	NA	Biotic stress	17	roots, rosette	9	Functional Genomic study in virus-infected plants.
RS08-05_BAC2_exp269	NA	Abiotic stress	17	rosette	8	bac2 mutant transcriptome modification during osmotic stress
ADT07-03_miR398-mutants_exp179	NA	Mutant	15	rosette	4	Defining new targets of miR398 by transcriptome analysis of two miR398 mutant alleles
RA06-04_BOS1_exp214	NA	Biotic stress	14	whole plant	15	BOS1 signaling pathway in Arabidopsis thaliana / Erwinia chrysanthemi interaction
RS04-05_Nickel_exp41	NA	Abiotic stress	14	roots	4	Effect of nicotianamine over-accumulation in standard condition and in response to nickel treatment
CEA03-01_Cadmium_exp16	16797112	Abiotic stress	12	roots, rosette	24	Dynamic of the Arabidopsis thaliana transcriptome following a cadmium exposition
RA03-07_TOR_exp23	NA	Mutant	12	roots	10	Transcriptome analysis of TOR (Target of Rapamycin) mutant.
RA04-03_Nin7_exp60	18826430	Mutant	12	roots, rosette	8	atnin7-1 (atnlp7) in two different nitrogen conditions.
RA04-07_PGPR_exp63	18184068	Biotic stress	11	roots	10	Arabidopsis thaliana transcriptome analysis in response to plant growth promoting rhizobacteria
