# Supplementary figures and images for: Uranium perturbs signaling and iron uptake response in Arabidopsis thaliana roots
Source: Royal Society of Chemistry journal article supplement (doi:10.1039/c4mt00005f), 2014-01-01

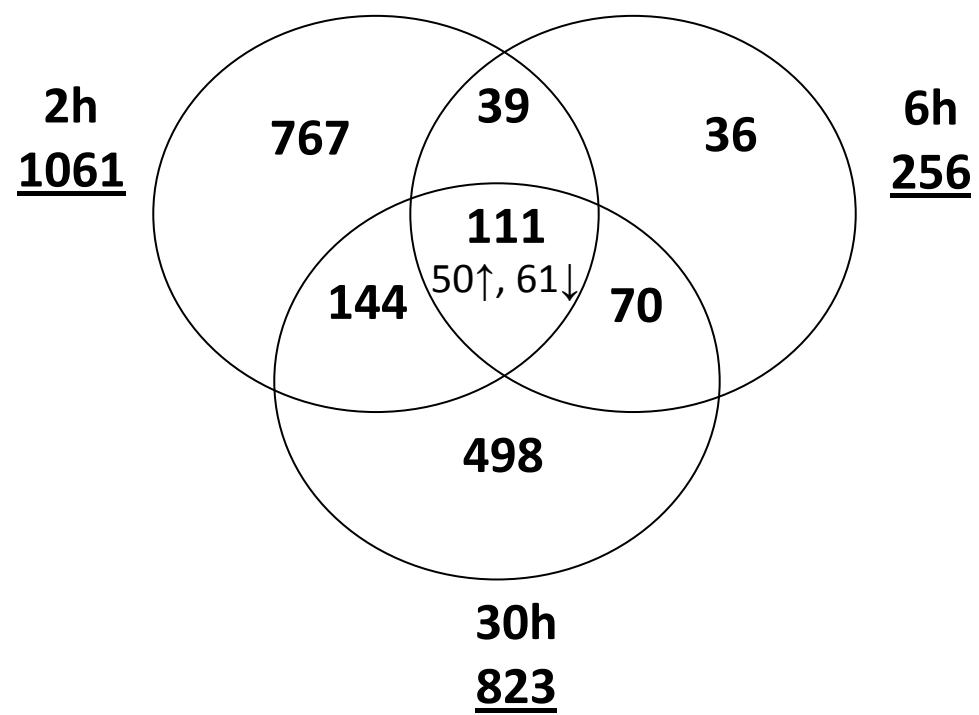

Supplement: c4mt00005f2.pdf [file c4mt00005f2.pdf]
